# Supplementary material
Source: PubMed Central journal article supplement (PMC4633758)
Supplement: supp_jiv288_jiv288supp_table1.pdf [file supp_jiv288_jiv288supp_table1.pdf]

## Supplementary Table 1

### A. Details of quasi-species population at day 9

| Reference NA                     | Pos  | Ref | Var | Frq1   | Frq2   | Frq3   | Pst1   | Pst2   | Pst3   | Fvar | Rvar | Ftot | Rtot | Pval     | Qval |
|----------------------------------|------|-----|-----|--------|--------|--------|--------|--------|--------|------|------|------|------|----------|------|
| BRISBANE_15_2011_pdm09-NA-332645 | 131  | A   | G   | 1      | -      | 1      | 1.0889 | -      | 1.1667 | 190  | 21   | 192  | 21   | 0.958268 | 1    |
| BRISBANE_15_2011_pdm09-NA-332645 | 135  | G   | T   | 1      | -      | 1      | 1.0889 | -      | 1.1667 | 187  | 20   | 187  | 20   | 1        | 1    |
| BRISBANE_15_2011_pdm09-NA-332645 | 244  | T   | C   | 0.9736 | 1      | 1      | 1.0029 | 0.9883 | 1.0061 | 265  | 380  | 268  | 380  | 0.980006 | 1    |
| BRISBANE_15_2011_pdm09-NA-332645 | 316  | A   | G   | 1      | 1      | 1      | 1.0061 | 1.0198 | 1.0017 | 376  | 320  | 376  | 325  | 0.957118 | 1    |
| BRISBANE_15_2011_pdm09-NA-332645 | 486  | C   | T   | 1      | 1      | 1      | 1.0974 | 1.2828 | 1.1235 | 258  | 232  | 261  | 237  | 0.982049 | 1    |
| BRISBANE_15_2011_pdm09-NA-332645 | 627  | C   | T   | 1      | 0.9801 | 1      | 1.1397 | 0.9995 | 1.1525 | 169  | 191  | 174  | 193  | 0.956532 | 1    |
| BRISBANE_15_2011_pdm09-NA-332645 | 823  | T   | C   | -      | 0.8297 | 0.5468 | -      | 1.1398 | 1.0341 | 89   | 101  | 160  | 178  | 0.972977 | 1    |
| BRISBANE_15_2011_pdm09-NA-332645 | 961  | A   | G   | 0.9905 | 1      | 1      | 1      | 1.3169 | 1.0022 | 369  | 306  | 371  | 306  | 0.985918 | 1    |
| BRISBANE_15_2011_pdm09-NA-332645 | 1131 | A   | G   | 1      | -      | 1      | 1.2061 | -      | 1.1333 | 171  | 70   | 171  | 70   | 1        | 1    |
| BRISBANE_15_2011_pdm09-NA-332645 | 1134 | C   | T   | 1      | -      | 1      | 1.2061 | -      | 1.1333 | 171  | 76   | 171  | 76   | 1        | 1    |
| BRISBANE_15_2011_pdm09-NA-332645 | 1191 | T   | A   | 1      | 1      | 0.9946 | 1.1333 | 1.1291 | 1      | 359  | 226  | 361  | 228  | 1        | 1    |
| BRISBANE_15_2011_pdm09-NA-332645 | 1248 | C   | T   | 1      | 1      | 0.9937 | 1.1291 | 0.9999 | 0.9995 | 453  | 456  | 455  | 462  | 0.975173 | 1    |
| BRISBANE_15_2011_pdm09-NA-332645 | 1288 | C   | A   | 0.0054 | 0.0063 | -      | 0.9746 | 0.9347 | -      | 3    | 1    | 499  | 512  | 0.613338 | 1    |
| BRISBANE_15_2011_pdm09-NA-332645 | 1291 | C   | G   | 0.0054 | 0.0063 | -      | 0.9746 | 0.9347 | -      | 2    | 1    | 517  | 520  | 0.995703 | 1    |
| BRISBANE_15_2011_pdm09-NA-332645 | 1294 | A   | G   | 1      | 1      | *      | 0.9991 | 0.9995 | *      | 514  | 543  | 515  | 543  | 1        | 1    |
| BRISBANE_15_2011_pdm09-NA-332645 | 1297 | G   | A   | 0.0063 | 0.0028 | *      | 0.9347 | 0.9045 | *      | 1    | 1    | 400  | 550  | 1        | 1    |

Quasi-species frequencies were estimated by first mapping the high-throughput sequencing data to reference NA (Brisbane 15 2011) and then inferring NA haplotypes from mapped reads [12]. The spreadsheet contains frequencies for each detected nucleotide change relative to reference sequence.

**B. Sequences of each inferred NA haplotype in the influenza virus population with corresponding frequencies at day 9**

>HAP0\_0.509519 | global\_haplotype frequency=0.509519

AATTGGAATGGCTAACTTAATATTACAAATTGGAAACATAATCTCAATATGGGTTAGCCACTCAATTCAACTTGGGAATCAAAGTCATATTGAAACATGCAATCAAAGC  
GTCATTACTTATGAAAACAACACTTGGGTAAATCAGACATATGTTAACATCAGCAACACCAACTTTGCTGCTGGACAGTCAGTGGTTCCCGTGAAATTAGCGGGCAAT  
TCCTCTCTCTGCCCTGTTAGTGGATGGGCTATATACAGTAAAGACAACAGTGTAAAGAATCGGTTCCAAGGGGGATGTGTTTGTGATAAGGGAACCATTCATATCATG  
CTCCCCCTTGGAAATGCAGAACCTTCTTCTTGACTCAAGGGGCCTTGCTAAATGACAAACATTCCAATGGAACCATTAAGACAGGAGCCCATATCGAACCCATTAATGA  
GCTGTCCTATTGGTGAAGTTCCTCTCCATACAACTCAAGATTTGAGTCAGTCGCTTGGTCAGCAAGTGCTTGTGATGATGGCATCAATTGGCTAACAATTGGAATTT  
CTGGCCAGACAATGGGGCAGTGGCTGTGTTAAAGTACAATGGCATAATAACAGACACTATCAAGAGTTGGAGAAACAATATATTGAGAACACAAGAGTCTGAATGT  
GCATGTGTAATGGTTCTTGCTTTACCATAATGACCGATGGACCAAGTGATGGACAGGCCTCATACAAGATCTTCAGAATAGAAAAGGGAAAGATAGTCAAATCAGT  
CGAAATGAATGCCCTAATTACTATGAGGAATGCTCCTGTTATCCTGATTCTAGTGAAATCACATGTGTGTGCAGGGATAACTGGCATGGCTCGAATCGACCGT  
GGGTGTCTTTCAACCAGAATCTGGAATATCAGATAGGATACATATGCAGTGGGGTTTTTCGGAGACAATCCACGCCCTAATGATAAGACAGGCAGTTGTGGTCCAGTA  
TCGTCTAATGGAGCAAATGGAGTAAAAGGATTTTCATTCAAATACGGCAATGGTGTGGATAGGGAGAACTAAAAGCATTAGTTCAAGAAAAGGTTTTGAGATGATT  
TGGGATCCGAATGGATGGACTGGGACAGACAATAACTTCTCAATAAAGCAAGATATCGTAGGAATAAAAGAGTGGTCAGGATATAGCGGGAGTTTTGTTTCAGCATCC  
AGAACTAACAGGGCTGGATTGTATAAGACCTTGCTTCTGGGTTGAACTAATCAGAGGGCGACCCGAAGAGAACACAATCTGGACTAGCGGGAGCAGCATATCCTTT  
TGTGGTGTAACAGTGACACTGTGGGTTGGTCT

>HAP1\_0.347995 | global\_haplotype frequency=0.347995

AATTGGAATGGCTAACTTAATATTACAAATTGGAAACATAATCTCAATATGGGTTAGCCACTCAATTCAACTTGGGAATCAAAGTCATATTGAAACATGCAATCAAAGC  
GTCATTACTTATGAAAACAACACTTGGGTAAATCAGACATATGTTAACATCAGCAACACCAACTTTGCTGCTGGACAGTCAGTGGTTCCCGTGAAATTAGCGGGCAAT  
TCCTCTCTCTGCCCTGTTAGTGGATGGGCTATATACAGTAAAGACAACAGTGTAAAGAATCGGTTCCAAGGGGGATGTGTTTGTGATAAGGGAACCATTCATATCATG  
CTCCCCCTTGGAAATGCAGAACCTTCTTCTTGACTCAAGGGGCCTTGCTAAATGACAAACATTCCAATGGAACCATTAAGACAGGAGCCCATATCGAACCCATTAATGA  
GCTGTCCTATTGGTGAAGTTCCTCTCCATACAACTCAAGATTTGAGTCAGTCGCTTGGTCAGCAAGTGCTTGTGATGATGGCATCAATTGGCTAACAATTGGAATTT  
CTGGCCAGACAATGGGGCAGTGGCTGTGTTAAAGTACAATGGCATAATAACAGACACTATCAAGAGTTGGAGAAACAATATATTGAGAACACAAGAGTCTGAATGT  
GCATGTGTAATGGTTCTTGCTTTACCATAATGACCGATGGACCAAGTGATGGACAGGCCTCATACAAGATCTTCAGAATAGAAAAGGGAAAGATAGTCAAATCAGT  
CGAAATGAATGCCCTAATTACTATGAGGAATGCTCCTGTTATCCTGATTCTAGTGAAATCACATGTGTGTGCAGGGATAACTGGCATGGCTCGAATCGACCGT  
GGGTGTCTTTCAACCAGAATCTGGAATATCAGATAGGATACATATGCAGTGGGGTTTTTCGGAGACAATCCACGCCCTAATGATAAGACAGGCAGTTGTGGTCCAGTA  
TCGTCTAATGGAGCAAATGGAGTAAAAGGATTTTCATTCAAATACGGCAATGGTGTGGATAGGGAGAACTAAAAGCATTAGTTCAAGAAAAGGTTTTGAGATGATT  
TGGGATCCGAATGGATGGACTGGGACAGACAATAACTTCTCAATAAAGCAAGATATCGTAGGAATAAAAGAGTGGTCAGGATATAGCGGGAGTTTTGTTTCAGCATCC  
AGAACTAACAGGGCTGGATTGTATAAGACCTTGCTTCTGGGTTGAACTAATCAGAGGGCGACCCGAAGAGAACACAATCTGGACTAGCGGGAGCAGCATATCCTTT  
TGTGGTGTAACAGTGACACTGTGGGTTGGTCT

>HAP2\_0.0267038 | global\_haplotype frequency=0.026704

AATTGGAATGGCTAACTTAATATTACAAATTGGAAACATAATCTCAATATGGGTTAGCCACTCAATTCAACTTGGGAATCAAAGTCATATTGAAACATGCAATCAAAGC  
GTCATTACTTATGAAAACAACACTTGGGTAAATCAGACATATGTTAACATCAGCAACACCAACTTTGCTGCTGGACAGTCAGTGGTTCCCGTGAAATTAGCGGGCAAT  
TCCTCTCTCTGCCCTGTTAGTGGATGGGCTATATACAGTAAAGACAACAGTGTAAAGAATCGGTTCCAAGGGGGATGTGTTTGTGATAAGGGAACCATTCATATCATG  
CTCCCCCTTGGAAATGCAGAACCTTCTTCTTGACTCAAGGGGCCTTGCTAAATGACAAACATTCCAATGGAACCATTAAAGACAGGAGCCCATATCGAACCTAATGA  
GCTGTCCTATTGGTGATCTTCCCTGTCCATACAACACTCAAGATTTGAGTCAGTCGCTTGGTCAGCAAGTGCTTGTGTCATGATGGCATCAATTGGCTAACAATTGGAATTT  
CTGGCCCAGACAATGGGGCAGTGGCTGTGTTAAAGTACAATGGCATAATAACAGACACTATCAAGAGTTGGAGAAACAATATATTGAGAACAACAAGAGTCTGAATGT  
GCATGTGTAATGGTTCTTGCTTTACCATAATGACCGATGGACCAAGTGATGGACAGGCCTCATACAAGATCTTCAGAATAGAAAAGGGAAAGATAGTCAAATCAGT  
CGAAATGAATGCCCTAATTACTATGAGGAATGCTCCTGTTATCCTGATTCTAGTGAAATCACATGTGTGTGCAGGGATAACTGGCATGGCTCGAATCGACCGT  
GGGTGTCTTTCAACCAGAATCTGGAATATCAGATAGGATACATATGCAGTGGGGTTTTCGGAGACAATCCACGCCCTAATGATAAGACAGGCAGTTGTGGTCCAGTA  
TCGTCTAATGGAGCAAATGGAGTAAAAGGATTTTTCAATCAATACGGCAATGGTGTGGATAGGGAGAATAAAAAGCATTAGTTCAAGAAAAGGTTTTGAGATGATT  
TGGGATCCGAATGGATGGACTGGGACAGACAATAACTTCTCAATAAAGCAAGATATCGTAGGAATAAAAAGAGTGGTCAGGATATAGCGGGAGTTTTGTTTCAGCATCC  
AGAATAACAGGGCTGGATTGTATAAGACCTTGCTTCTGGGTTGAACTAATCAGAGGGCGACCCGAAGAGAACAACAATCTGGACTAGCGGGAGCAGCATATCCTTT  
TGTGGTGTAACAGTGACACTGTGGGTTGGTCT

>HAP3\_0.0261443 | global\_haplotype frequency=0.026144

AATTGGAATGGCTAACTTAATATTACAAATTGGAAACATAATCTCAATATGGGTTAGCCACTCAATTCAACTTGGGAATCAAAGTCATATTGAAACATGCAATCAAAGC  
GTCATTACTTATGAAAACAACACTTGGGTAAATCAGACATATGTTAACATCAGCAACACCAACTTTGCTGCTGGACAGTCAGTGGTTCCCGTGAAATTAGCGGGCAAT  
TCCTCTCTCTGCCCTGTTAGTGGATGGGCTATATACAGTAAAGACAACAGTGTAAAGAATCGGTTCCAAGGGGGATGTGTTTGTGATAAGGGAACCATTCATATCATG  
CTCCCCCTTGGAAATGCAGAACCTTCTTCTTGACTCAAGGGGCCTTGCTAAATGACAAACATTCCAATGGAACCATTAAAGACAGGAGCCCATATCGAACCTAATGA  
GCTGTCCTATTGGTG-  
AGTTCCCTCTCCATACAACACTCAAGATTTGAGTCAGTCGCTTGGTCAGCAAGTGCTTGTGTCATGATGGCATCAATTGGCTAACAATTGGAATTTCTGGCCCAGACAATG  
GGGCAGTGGCTGTGTTAAAGTACAATGGCATAATAACAGACACTATCAAGAGTTGGAGAAACAATATATTGAGAACAACAAGAGTCTGAATGTGCATGTGTAATGGT  
TCTTGCTTTACCATAATGACCGATGGACCAAGTGATGGACAGGCCTCATACAAGATCTTCAGAATAGAAAAGGGAAAGATAGTCAAATCAGTCGAAATGAATGCCCC  
TAATTATCACTATGAGGAATGCTCCTGTTATCCTGATTCTAGTGAAATCACATGTGTGTGCAGGGATAACTGGCATGGCTCGAATCGACCGTGGGTGTCTTTCAACC  
AGAATCTGGAATATCAGATAGGATACATATGCAGTGGGGTTTTCGGAGACAATCCACGCCCTAATGATAAGACAGGCAGTTGTGGTCCAGTATCGTCTAATGGAGCA  
AATGGAGTAAAAGGATTTTCAATCAATACGGCAATGGTGTGGATAGGGAGAATAAAAAGCATTAGTTCAAGAAAAGGTTTTGAGATGATTTGGGATCCGAATGGA  
TGGACTGGGACAGACAATAACTTCTCAATAAAGCAAGATATCGTAGGAATAAAAAGAGTGGTCAGGATATAGCGGGAGTTTTGTTTCAGCATCCAGAATAACAGGGCT  
GGATTGTATAAGACCTTGCTTCTGGGTTGAACTAATCAGAGGGCGACCCGAAGAGAACAACAATCTGGACTAGCGGGAGCAGCATATCCTTTTGTGGTGTAACAGT  
GACACTGTGGCTTGGTCT

>HAP4\_0.0173052 | global\_haplotype frequency=0.017305

AATTGGAATGGCTAACTTAATATTACAAATTGGAAACATAATCTCAATATGGGTTAGCCACTCAATTCAACTTGGGAATCAAAGTCATATTGAAACATGCAATCAAAGC  
GTCATTACTTATGAAAACAACACTTGGGTAAATCAGACATATGTTAACATCAGCAACACCAACTTTGCTGCTGGACAGTCAGTGGTTCCCGTCAAATTAGCGGGCAAT  
TCCTCTCTCTGCCCTGTTAGTGGATGGGCTATATACAGTAAAGACAACAGTGTAAAGAATCGGTTCCAAGGGGGATGTGTTTGTGATAAGGGAACCATTTCATATCATG  
CTCCCCCTTGGAAATGCAGAACCTTCTTCTTACTCAAGGGGCTTGGCTAAATGACAAACATTCCAATGGAACCATTAAAGACAGGAGCCCATATCGAACCCCTAATGA  
GCTGTCCTATTGGTGAAGTTCCTCTCCATACAACACTCAAGATTTGAGTCAGTCGCTTGGTCAGCAAGTGTGTCATGATGGCATCAATTGGCTAACAATTGGAATTT  
CTGGCCCAGACAATGGGGCAGTGGCTGTGTTAAAGTACAATGGCATAATAACAGACACTATCAAGAGTTGGAGAAACAATATATTGAGAACTCAAGAGTCTGAATGT  
GCATGTGTAAATGGTTCTTGGCTTTACCATAATGACCGATGGACCAAGTGTGACAGGCCTCATAACAAGATCTTCAGAATAGAAAAGGGAAAGATAGTCAAATCAGT  
CGAAATGAATGCCCTAATTATCACTATGAGGAATGCTCCTGTTATCCTGATTCTAGTGAAATCACATGTGTGTGCAGGGATAACTGGCATGGCTCGAATCGACCGT  
GGGTGTCTTTCAACCAGAATCTGGAATATCAGATAGGATACATATGCAGTGGGGTTTTTCGGAGACAATCCACGCCCTAATGATAAGACAGGCAGTTGTGGTCCAGTA  
TCGTCTAATGGAGCAAATGGAGTAAAAGGATTTTCATTCAAATACGGCAATGGTGTGGATAGGGGAGAACTAAAAGCATTAGTTCAAGAAAAGGTTTTGAGATGATT  
TGGGATCCGAATGGATGGACTGGGACAGACAATAACTTCTCAATAAAGCAAGATATCGTAGGAATAAAGAGTGGTCAGGATATAGCGGGAGTTTTGTTTCAGCATCC  
AGAATAACAGGGCTGGATTGTATAAGACCTTGCTTCTGGGTTGAACTAATCAGAGGGCGACCCGAAGAGAACACAATCTGGACTAGCGGGAGCAGCATATCCTTT  
TGTGGTGTAAACAGTGACACTGTGGCTTGGTCT

>HAP5\_0.00720593 | global\_haplotype frequency=0.007206

AATTGGAATGGCTAACTTAATATTACAAATTGGAAACATAATCTCAATATGGGTTAGCCACTCAATTCAACTTGGGAATCAAAGTCATATTGAAACATGCAATCAAAGC  
GTCATTACTTATGAAAACAACACTTGGGTAAATCAGACATATGTTAACATCAGCAACACCAACTTTGCTGCTGGACAGTCAGTGAGATCGGGCACATTAGCGGGCAA  
TTCCTCTCTCTGCCCTGTTAGTGGATGGGCTATATACAGTAAAGACAACAGTGTAAAGAATCGGTTCCAAGGGGGATGTGTTTGTGATAAGGGAACCATTTCATATCAT  
GCTCCCCCTTGGAAATGCAGAACCTTCTTCTTACTCAAGGGGCTTGGCTAAATGACAAACATTCCAATGGAACCATTAAAGACAGGAGCCCATATCGAACCCCTAATG  
AGCTGTCCTATTGGTGAAGTTCCTCTCCATACAACACTCAAGATTTGAGTCAGTCGCTTGGTCAGCAAGTGTGTCATGATGGCATCAATTGGCTAACAATTGGAATT  
TCTGGCCCAGACAATGGGGCAGTGGCTGTGTTAAAGTACAATGGCATAATAACAGACACTATCAAGAGTTGGAGAAACAATATATTGAGAACAACAAGAGTCTGAATG  
TGCATGTGTAAATGGTTCTTGGCTTTACCATAATGACCGATGGACCAAGTGTGACAGGCCTCATAACAAGATCTTCAGAATAGAAAAGGGAAAGATAGTCAAATCAG  
TCGAAATGAATGCCCTAATTATTACTATGAGGAATGCTCCTGTTATCCTGATTCTAGTGAAATCACATGTGTGTGCAGGGATAACTGGCATGGCTCGAATCGACCG  
TGGGTGTCTTTCAACCAGAATCTGGAATATCAGATAGGATACATATGCAGTGGGGTTTTTCGGAGACAATCCACGCCCTAATGATAAGACAGGCAGTTGTGGTCCAGT  
ATCGTCTAATGGAGCAAATGGAGTAAAAGGATTTTCATTCAAATACGGCAATGGTGTGGATAGGGGAGAACTAAAAGCATTAGTTCAAGAAAAGGTTTTGAGATGAT  
TTGGGATCCGAATGGATGGACTGGGACAGACAATAACTTCTCAATAAAGCAAGATATCGTAGGAATAAAGAGTGGTCAGGATATAGCGGGAGTTTTGTTTCAGCATC  
CAGAATAACAGGGCTGGATTGTATAAGACCTTGCTTCTGGGTTGAACTAATCAGAGGGCGACCCGAAGAGAACACAATCTGGACTAGCGGGAGCAGCATATCCTT  
TTGTGGTGTAAACAGTGACACTGTGGGTTGGTCT

>HAP6\_0.00715258 | global\_haplotype frequency=0.007153

AATTGGAATGGCTAACTTAATATTACAAATTGGAAACATAATCTCAATATGGGTTAGCCACTCAATTCAACTTGGGAATCAAAGTCATATTGAAACATGCAATCAAAGC  
GTCATTACTTATGAAAACAACACTTGGGTAAATCAGACATATGTTAACATCAGCAACACCAACTTTGCTGCTGGACAGTCAGTGGTTCCCGTGAAATTAGCGGGCAAT  
TCCTCTCTCTGCCCTGTTAGTGGATGGGCTATATACAGTAAAGACAACAGTGTAAAGAATCGGTTCCAAGGGGGATGTGTTTGTGATAAGGGAACCATTCATATCATG  
CTCCCCCTTGGAAATGCAGAACCTTCTTCTTGA CTCAAGGGGCCTTGCTAAATGACAAACATTCCAATGGAACCATTAAGACAGGAGCCCATATCGAACCCTAATGA  
GCTGTCCTATTGGTGAAGTTCCTCTCCATACAACTCAAGATTTGAGTCAGTCGCTTGGTCAGCAAGTGCTTGTGTCATGATGGCATCAATTGGCTAACAATTGGAATTT  
CTGGCCCAGACAATGGGGCAGTGGCTGTGTTAAAGTACAATGGCATAATAACAGACACTATCAAGAGTTGGAGAAACAATATATTGAGAACACAAGAGTCTGAATGT  
GCATGTGTAAATGGTTCTTGCTTTACCATAATGACCGATGGACCAAGTGATGGACAGGCCTCATAAAGATCTTCAGAATAGAAAAGGGAAAGATAGTCAAATCAGT  
CGAAATGAATGCCCTAATTACTATGAGGAATGCTCCTGTTATCCTGATTCTAGTGAAATCACATGTGTGTGCAGGGATAACTGGCATGGCTCGAATCGACCGT  
GGGTGTCTTTCAACCAGAATCTGGAATATCAGATAGGATACATATGCAGTGGGGTTTTTCGGAGACAATCCAGATCGGAATGATAAGACAGGCAGTTGTGGTCCAGT  
ATCGTCTAATGGAGCAAATGGAGTAAAAGGATTTTCATTCAAATACGGCAATGGTGTGGATAGGGGAGAACTAAAAGCATTAGTTCAAGAAAAGGTTTTGAGATGAT  
TTGGGATCCGAATGGATGGACTGGGACAGACAATAACTTCTCAATAAAGCAAGATATCGTAGGAATAAAGAGTGGTCAGGATATAGCGGGAGTTTTGTTTCAGCATC  
CAGAATAACAGGGCTGGATTGTATAAGACCTTGCTTCTGGGTTGAACTAATCAGAGGGCGACCCGAAGAGAACAACAATCTGGACTAGCGGGAGCAGCATATCCTT  
TTGTGGTGTAACAGTGACACTGTGGCTTGGTCT

>HAP7\_0.006165 | global\_haplotype frequency=0.006165

AATTGGAATGGCTAACTTAATATTACAAATTGGAAACATAATCTCAATATGGGTTAGCCACTCAATTCAACTTGGGAATCAAAGTCATATTGAAACATGCAATCAAAGC  
GTCATTACTTATGAAAACAACACTTGGGTAAATCAGACATATGTTAACATCAGCAACACCAACTTTGCTGCTGGACAGTCAGTGGTTCCCGTGAAATTAGCGGGCAAT  
TCCTCTCTCTGCCCTGTTAGTGGATGGGCTATATACAGTAAAGACAACAGTGTAAAGAATCGGTTCCAAGAGCGATGTGTTTGTGATAAGGGAACCATTCATATCATG  
CTCCCCCTTGGAAATGCAGAACCTTCTTCTTGA CTCAAGGGGCCTTGCTAAATGACAAACATTCCAATGGAACCATTAAGACAGGAGCCCATATCGAACCCTAATGA  
GCTGTCCTATTGGTGAAGTTCCTCTCCATACAACTCAAGATTTGAGTCAGTCGCTTGGTCAGCAAGTGCTTGTGTCATGATGGCATCAATTGGCTAACAATTGGAATTT  
CTGGCCCAGACAATGGGGCAGTGGCTGTGTTAAAGTACAATGGCATAATAACAGACACTATCAAGAGTTGGAGAAACAATATATTGAGAACACAAGAGTCTGAATGT  
GCATGTGTAAATGGTTCTTGCTTTACCATAATGACCGATGGACCAAGTGATGGACAGGCCTCATAAAGATCTTCAGAATAGAAAAGGGAAAGATAGTCAAATCAGT  
CGAAATGAATGCCCTAATTACTATGAGGAATGCTCCTGTTATCCTGATTCTAGTGAAATCACATGTGTGTGCAGGGATAACTGGCATGGCTCGAATCGACCGT  
GGGTGTCTTTCAACCAGAATCTGGAATATCAGATAGGATACATATGCAGTGGGGTTTTTCGGAGACAATCCACGCCCTAATGATAAGACAGGCAGTTGTGGTCCAGTA  
TCGTCTAATGGAGCAAATGGAGTAAAAGGATTTTCATTCAAATACGGCAATGGTGTGGATAGGGGAGAACTAAAAGCATTAGTTCAAGAAAAGGTTTTGAGATGATT  
TGGGATCCGAATGGATGGACTGGGACAGACAATAACTTCTCAATAAAGCAAGATATCGTAGGAATAAAGAGTGGTCAGGATATAGCGGGAGTTTTGTTTCAGCATCC  
AGAATAACAGGGCTGGATTGTATAAGACCTTGCTTCTGGGTTGAACTAATCAGAGGGCGACCCGAAGAGAACAACAATCTGGACTAGCGGGAGCAGCATATCCTTT  
TGTGGTGTAACAGTGACACTGTGGCTTGGTCT

>HAP8\_0.00510781 | global\_haplotype frequency=0.005108

AATTGGAATGGCTAACTTAATATTACAAATTGGAAACATAATCTCAATATGGGTTAGCCACTCAATTCAACTTGGGAATCAAAGTCATATTGAAACATGCAATCAAAGC  
GTCATTACTTATGAAAACAACACTTGGGTAAATCAGACATATGTTAACATCAGCAACACCAACTTTGCTGCTGGACAGTCAGTGGTTCCCGTGAAATTAGCGGGCAAT  
TCCTCTCTCTGCCCTGTTAGTGGATGGGCTATATACAGTAAAGACAACAGTGTAAAGAATCGGTTCCAAGGGGGATGTGTTTGTGATAAGGGAACCATTTCATATCATG  
CTCCCCCTTGGAAATGCAGAACCTTCTTCTTGACTCAAGGGGCCTTGCTAAATGACAAACATTCCAATGGAACCATTAAAGACAGGAGCCCATATCGAACCCTAATGA  
GCTGTCCTATTGGTGAAGTTCCTCTCCATACAACTCAAGATTTGAGTCAGTCGCTTGGTCAGCAAGTCTTGTGTCATGATGGCATCAATTGGCTAACAATTGGAATTT  
CTGGCCCAGACAATGGGGCAGTGGCTGTGTTAAAGTACAATGGCATAATAACAGACACTATCAAGAGTTGGAGAAACAATATATTGAGAACAACAAGAGTCTGAATGT  
GCATGTGTAATGGTTCTTGCTTTACCATAATGACCGATGGACCAAGTGATGGACAGGCCTCATAACAAGATCTTCAGAATAGAAAAGGGAAAGATAGTCAAATCAGT  
CGAAATGAATGCCCTAATTATCACTATGAGGAATGCTCCTGTTATCCTGATTCTAGTGAAATCACATGTGTGTGCAGGGATAACTGGCATGGCTCGAATCGACCGT  
GGGTGTCTTTCAACCAGAATCTGGAATATCAGATAGGATACATATGCAGTGGGGTTTTTCGGAGACAATCCACGCCCTAATGATAAGACAGGCAGTTGTGGTCCAGTA  
TCGTCTAATGGAGCAAATGGAGTAAAAGGATTTTCATTCAAATACGGCAATGGTGTGGATAGGGGAGAACTAAAAGCATTAGTTCAAGAAAAGGTTTTGAGATGATT  
TGGGATCCGAATGGATGGACTGGGACAGACAATAACTTCTCAATAAAGCAAGATATCGTAGGAATAAAGAGTGGTCAGGATATAGCGGGAGTTTTGTTTCAGCATCC  
AGAATAACAGGGCTGGATTGTATAAGACCTTGCTTCTGGGTTGAACTAATCAGAGGGCGACCCGAAGAGAACAACAATCTGGACTAGCGAGAGCAGCATATCCTTT  
TGTGGTGTAAACAGTGACACTGTGGCTTGGTCT

>HAP9\_0.00494511 | global\_haplotype frequency=0.004945

AATTGGAATGGCTAACTTAATATTACAAATTGGAAACATAATCTCAATATGGGTTAGCCACTCAATTCAACTTGGGAATCAAAGTCATATTGAAACATGCAATCAAAGC  
GTCATTACTTATGAAAACAACACTTGGGTAAATCAGACATATGTTAACATCAGCAACACCAACTTTGCTGCTGGACAGTCAGTGGTTCCCGTGAAATTAGCGGGCAAT  
TCCTCTCTCTGCCCTGTTAGTGGATGGGCTATATACAGTAAAGACAACAGTGTAAAGAATCGGTTCCAAGGGGGATGTGTTTGTGATAAGGGAACCATTTCATATCATG  
CTCCCCCTTGGAAATGCAGAACCTTCTTCTTGACTCAAGGGGCCTTGCTAAATGACAAACATTCCAATGGAACCATTAAAGACAGGAGCCCATATCGAACCCTAATGA  
GCTGTCCTATTGGTGAAGTCCCCTCTCCATACAACTCAAGATTTGAGTCAGTCGCTTGGTCAGCAAGTCTTGTGTCATGATGGCATCAATTGGCTAACAATTGGAATT  
TCAGATCGGAAGAATGGGGCAGTGGCTGTGTTAAAGTACAATGGCATAATAACAGACACTATCAAGAGTTGGAGAAACAATATATTGAGAACAACAAGAGTCTGAATG  
TGCATGTGTAATGGTTCTTGCTTTACCATAATGACCGATGGACCAAGTGATGGACAGGCCTCATAACAAGATCTTCAGAATAGAAAAGGGAAAGATAGTCAAATCAG  
TCGAAATGAATGCCCTAATTATCACTATGAGGAATGCTCCTGTTATCCTGATTCTAGTGAAATCACATGTGTGTGCAGGGATAACTGGCATGGCTCGAATCGACCG  
TGGGTGTCTTTCAACCAGAATCTGGAATATCAGATAGGATACATATGCAGTGGGGTTTTTCGGAGACAATCCACGCCCTAATGATAAGACAGGCAGTTGTGGTCCAGT  
ATCGTCTAATGGAGCAAATGGAGTAAAAGGATTTTCATTCAAATACGGCAATGGTGTGGATAGGGGAGAACTAAAAGCATTAGTTCAAGAAAAGGTTTTGAGATGAT  
TTGGGATCCGAATGGATGGACTGGGACAGACAATAACTTCTCAATAAAGCAAGATATCGTAGGAATAAAGAGTGGTCAGGATATAGCGGGAGTTTTGTTTCAGCATC  
CAGAATAACAGGGCTGGATTGTATAAGACCTTGCTTCTGGGTTGAACTAATCAGAGGGCGACCCGAAGAGAACAACAATCTGGACTAGCGGGAGCAGCATATCCTT  
TTGTGGTGTAAACAGTGACACTGTGGCTTGGTCT
