# Supplementary material
Source: PubMed Central journal article supplement (PMC4633758)
Supplement: supp_jiv288_jiv288supp_table2.pdf [file supp_jiv288_jiv288supp_table2.pdf]

## Supplementary Table 2

### A. Details of quasi-species population at day 15

| Reference NA                     | Pos  | Ref | Var | Frq1   | Frq2   | Frq3   | Pst1   | Pst2   | Pst3   | Fvar | Rvar | Ftot | Rtot | Pval      | Qval      |
|----------------------------------|------|-----|-----|--------|--------|--------|--------|--------|--------|------|------|------|------|-----------|-----------|
| BRISBANE_15_2011_pdm09-NA-332645 | 131  | A   | G   | 1      | -      | 1      | 1.1646 | -      | 1.206  | 691  | 62   | 695  | 62   | 0.924777  | 1         |
| BRISBANE_15_2011_pdm09-NA-332645 | 135  | G   | T   | 1      | -      | 1      | 1.1646 | -      | 1.206  | 683  | 57   | 692  | 57   | 0.907647  | 1         |
| BRISBANE_15_2011_pdm09-NA-332645 | 244  | T   | C   | 1      | 1      | 0.9672 | 1      | 1      | 0.9999 | 1410 | 1311 | 1424 | 1335 | 0.972332  | 1         |
| BRISBANE_15_2011_pdm09-NA-332645 | 316  | A   | G   | 1      | 0.993  | 1      | 0.9998 | 1.0027 | 1      | 1945 | 1773 | 1950 | 1783 | 0.992508  | 1         |
| BRISBANE_15_2011_pdm09-NA-332645 | 331  | A   | G   | 0.011  | -      | 0.0029 | 0.9978 | -      | 1      | 12   | 2    | 1904 | 1738 | 0.0293243 | 0.6451346 |
| BRISBANE_15_2011_pdm09-NA-332645 | 436  | A   | G   | 0.0069 | -      | 0.0152 | 0.9519 | -      | 0.9359 | 3    | 9    | 1418 | 1577 | 0.230864  | 1         |
| BRISBANE_15_2011_pdm09-NA-332645 | 486  | C   | T   | 0.9619 | 1      | 1      | 0.9997 | 1.0041 | 0.9992 | 1807 | 1408 | 1828 | 1432 | 0.988179  | 1         |
| BRISBANE_15_2011_pdm09-NA-332645 | 627  | C   | T   | 0.9728 | 1      | 1      | 1.0009 | 1      | 1.0095 | 1092 | 1299 | 1132 | 1310 | 0.900372  | 1         |
| BRISBANE_15_2011_pdm09-NA-332645 | 823  | T   | C   | 0.0325 | 0.1175 | 0.0257 | 0.9476 | 1      | 0.9487 | 54   | 74   | 1222 | 1247 | 0.299895  | 1         |
| BRISBANE_15_2011_pdm09-NA-332645 | 898  | A   | -   | 0.0024 | -      | 0.0072 | 0.9755 | -      | 0.9605 | 4    | 6    | 2133 | 1655 | 0.489105  | 1         |
| BRISBANE_15_2011_pdm09-NA-332645 | 951  | A   | G   | -      | 0.0023 | 0.0133 | -      | 0.9071 | 1      | 2    | 3    | 1467 | 1594 | 1         | 1         |
| BRISBANE_15_2011_pdm09-NA-332645 | 961  | A   | G   | 0.9878 | 0.9706 | 1      | 0.9995 | 0.9996 | 1.0107 | 1678 | 1609 | 1712 | 1627 | 0.966023  | 1         |
| BRISBANE_15_2011_pdm09-NA-332645 | 961  | A   | -   | 0.0059 | 0.0077 | -      | 0.9526 | 1      | -      | 12   | 7    | 1712 | 1627 | 0.461593  | 1         |
| BRISBANE_15_2011_pdm09-NA-332645 | 973  | A   | C   | 0.0063 | 0.0012 | -      | 1      | 0.9054 | -      | 8    | 1    | 1499 | 1659 | 0.0336176 | 0.6451346 |
| BRISBANE_15_2011_pdm09-NA-332645 | 981  | C   | G   | 0.005  | 0.0012 | -      | 0.9996 | 0.9028 | -      | 2    | 1    | 1393 | 1562 | 0.915142  | 1         |
| BRISBANE_15_2011_pdm09-NA-332645 | 1131 | A   | G   | 0.9911 | 1      | 1      | 1      | 1.0232 | 1.1821 | 1033 | 496  | 1036 | 498  | 1         | 1         |
| BRISBANE_15_2011_pdm09-NA-332645 | 1134 | C   | T   | 0.9911 | 1      | 1      | 1      | 1.0232 | 1.1821 | 1034 | 502  | 1042 | 505  | 0.9793    | 1         |
| BRISBANE_15_2011_pdm09-NA-332645 | 1191 | T   | A   | 1      | 1      | 0.9824 | 1.1821 | 1.1054 | 1      | 1884 | 1347 | 1900 | 1366 | 0.989835  | 1         |
| BRISBANE_15_2011_pdm09-NA-332645 | 1248 | C   | T   | 1      | 1      | 1      | 1.1054 | 1      | 1      | 2112 | 2152 | 2121 | 2159 | 0.998366  | 1         |
| BRISBANE_15_2011_pdm09-NA-332645 | 1275 | A   | G   | 0.0053 | -      | 0.005  | 1      | -      | 1      | 5    | 7    | 2663 | 2526 | 0.719609  | 1         |
| BRISBANE_15_2011_pdm09-NA-332645 | 1278 | A   | C   | 0.0053 | -      | 0.005  | 1      | -      | 1      | 9    | 6    | 2659 | 2513 | 0.708007  | 1         |
| BRISBANE_15_2011_pdm09-NA-332645 | 1294 | A   | G   | 1      | 1      | *      | 1      | 1      | *      | 2200 | 2276 | 2211 | 2278 | 0.986384  | 1         |

Quasi-species frequencies were estimated by first mapping the high-throughput sequencing data to reference NA (Brisbane 15 2011) and then inferring NA haplotypes from mapped reads [12]. The spreadsheet contains frequencies for each detected nucleotide change relative to reference sequence.

**B. Sequences of each inferred NA haplotype in the influenza virus population with corresponding frequencies at day 15**

>HAP0\_0.406517 | global\_haplotype frequency=0.406517

CTGTATGACAATTGGAATGGCTAACTTAATATTACAAATTGGAAACATAATCTCAATATGGGTTAGCCACTCAATTCAACTTGGGAATCAAAGTCATATTGAAACATGC  
AATCAAAGCGTCATTACTTATGAAAACAACACTTGGGTAAATCAGACATATGTTAACATCAGCAACACCAACTTTGCTGCTGGACAGTCAGTGGTTCCCGTCAAATTA  
GCGGGCAATTCCTCTCTCTGCCCTGTTAGTGGATGGGCTATATACAGTAAAGACAACAGTGTAAAGAACCGTTCCAAGGGGGATGTGTTTGTGATAAGGGGAACCAT  
TCATATCATGCTCCCCCTTGAATGCAGAACCTTCTTCTTGAAGGAGGCTTAAATGACAAACATTCCAATGGAACCATTAAAGACAGGAGCCCATATCGA  
ACCCTAATGAGCTGTCCTATTGGTGAAGTTCCTCTCCATACAACTCAAGATTTGAGTCAGTCGCTTGGTCAGCAAGTGTGCTTGTGATGATGGCATCAATTGGCTAAC  
AATTGGAATTTCTGGCCCAGACAATGGGGCAGTGGCTGTGTTAAAGTACAATGGCATAATAACAGACACTATCAAGAGTTGGAGAAACAATATATTGAGAACAACAAG  
AGTCTGAATGTGCATGTGTAATGGTTCTTGTCTTACCATAATGACCGATGGACCAAGTGTGACAGGCCTCATAACAAGATCTTCAGAATAGAAAAGGGAAAGATA  
GTCAAATCAGTCGAAATGAATGCCCTAATTACTATGAGGAATGCTCCTGTTATCCTGATTCTAGTGAAATCACATGTGTGTGCAGGGATAACTGGCATGGCTC  
GAATCGACCGTGGGTGTCTTTCAACCAGAATCTGGAATATCAGATAGGATACATATGCAGTGGGGTTTTTCGAGACAATCCACGCCCTAATGATAAGACAGGCAGTT  
GTGGTCCAGTATCGTCTAATGGAGCAAATGGAGTAAAAGGATTTTCAATCAAATACGGCAATGGTGTGTTGGATAGGGGAGAACTAAAAGCATTAGTTCAAGAAAAGGT  
TTTGAGATGATTTGGGATCCGAATGGATGGACTGGGGCAGACAATAACTTCTCAATAAAGCAAGATATCGTAGGAATAAAGAGTGGTCAGGATATAGCGGGAGTTT  
TGTTGAGCATCCAGAATAACAGGGCTGGATTGTATAAGACCTTGCTTCTGGGTTGAACTAATCAGAGGGCGACCCGAAGAGAACACAATCTGGACTAGCGGGAGC  
AGCATATCCTTTTGTGGTGTAAACAGTGACACTGTGGGTTGGTCT

>HAP1\_0.0897058 | global\_haplotype frequency=0.089706

CTGTATGACAATTGGAATGGCTAACTTAATATTACAAATTGGAAACATAATCTCAATATGGGTTAGCCACTCAATTCAACTTGGGAATCAAAGTCATATTGAAACATGC  
AATCAAAGCGTCATTACTTATGAAAACAACACTTGGGTAAATCAGACATATGTTAACATCAGCAACACCAACTTTGCTGCTGGACAGTCAGTGGTTCCCGTCAAATTA  
GCGGGCAATTCCTCTCTCTGCCCTGTTAGTGGATGGGCTATATACAGTAAAGACAACAGTGTAAAGAACCGTTCCAAGGGGGATGTGTTTGTGATAAGGGGAACCAT  
TCATATCATGCTCCCCCTTGAATGCAGAACCTTCTTCTTGAAGGAGGCTTAAATGACAAACATTCCAATGGAACCATTAAAGACAGGAGCCCATATCGA  
ACCCTAATGAGCTGTCCTATTGGTGAAGTTCCTCTCCATACAACTCAAGATTTGAGTCAGTCGCTTGGTCAGCAAGTGTGCTTGTGATGATGGCATCAATTGGCTAAC  
AATTGGAATTTCTGGCCCAGACAATGGGGCAGTGGCTGTGTTAAAGTACAATGGCATAATAACAGACACTATCAAGAGTTGGAGAAACAATATATTGAGAACAACAAG  
AGTCTGAATGTGCATGTGTAATGGTTCTTGTCTTACCATAATGACCGATGGACCAAGTGTGACAGGCCTCATAACAAGATCTTCAGAATAGAAAAGGGAAAGATA  
GTCAAATCAGTCGAAATGAATGCCCTAATTACTATGAGGAATGCTCCTGTTATCCTGATTCTAGTGAAATCACATGTGTGTGCAGGGATAACTGGCATGGCTC  
GAATCGACCGTGGGTGTCTTTCAACCAGAATCTGGAATATCAGATAGGATACATATGCAGTGGGGTTTTTCGAGACAATCCACGCCCTAATGATAAGACAGGCAGTT  
GTGGTCCAGTATCGTCTAATGGAGCAAATGGAGTAAAAGGATTTTCAATCGGATACGGCAATGGTGTGTTGGATAGGGGAGAACTAAAAGCATTAGTTCAAGAAAAGGT  
TTTGAGATGATTTGGGATCCGAATGGATGGACTGGGACAGACAATAACTTCTCAATAAAGCAAGATATCGTAGGAATAAAGAGTGGTCAGGATATAGCGGGAGTTT  
TGTTGAGCATCCAGAATAACAGGGCTGGATTGTATAAGACCTTGCTTCTGGGTTGAACTAATCAGAGGGCGACCCGAAGAGAACACAATCTGGACTAGCGGGAGC  
AGCATATCCTTTTGTGGTGTAAACAGTGACACTGTGGGTTGGTCT

>HAP2\_0.0807671 | global\_haplotype frequency=0.080767

CTGTATGACAATTGGAATGGCTAACTTAATATTACAAATTGGAAACATAATCTCAATATGGGTTAGCCACTCAATTCAACTTGGGAATCAAAGTCATATTGAAACATGC  
AATCAAAGCGTCATTACTTATGAAAACAACACTTGGGTAAATCAGACATATGTTAACATCAGCAACACCAACTTTGCTGCTGGACAGTCAGTGGTTCCCGTGAAATTA  
GCGGGCAATTCCTCTCTCTGCCCTGTTAGTGGATGGGCTATATACAGTAAAGACAACAGTGTAAAGAATCGGTTCCAAGGGGGATGTGTTTGTGATAAGGGGAACCAT  
TCATATCATGCTCCCCCTTGAATGCAGAACCTTCTTCTTGACTCAAGGGGCCCTTGCTAAATGACAAACATTCCAATGGAACCATTAAAGACAGGAGCCCATATCGA  
ACCCTAATGAGCTGTCCTATTGGTGAAGTTCCTCTCCATACAACACTCAAGATTTGAGTCAGTCGCTTGGTCAGCAAGTGCTTGTGATGATGGCATCAATTGGCTAAC  
AATTGGAATTTCTGGCCCAGACAATGGGGCAGTGGCTGTGTTAAAGTACAATGGCATAATAACAGACACTATCAAGAGTTGGAGAAACAATATATTGAGAACACAAG  
AGTCTGAATGTGCATGTGTAATGGTTCTTGCTTTACCATAATGACCGATGGACCAAGTGTGACAGGGCCTCATACAAGATCTTCAGAATAGAAAAGGGAAAGATA  
GTCAAATCAGTCGAAATGAATGCCCTAATTACTATGAGGAATGCTCCTGTTATCCTGATTCTAGTGAATCACATGTGTGTGCAGGGATAACTGGCATGGCTC  
GAATCGACCGTGGGTGTCTTTCAACCAGAATCTGGAATATCAGATAGGATACATATGCAGTGGGGTTTTTCGGAGACAATCCACGCCCTAATGATAAGACAGGCAGTT  
GTGGTCCAGTATCGTCTAATGGAGCAAATGGAGTAAAAGGATTTTCATTAGATACGGCAATGGTGTGGATAGGGGAGAACTAAAAGCATTAGTTCAAGAAAAGGT  
TTTGAGATGATTTGGGATCCGAATGGATGGACTGGGACAGACAATAAATTCTCAATAAAGCAAGATATCGTAGGAATAAAGAGTGGTCAGGATATAGCGGGAGTTT  
TGTTTCAGCATCCAGAATAACAGGGCTGGATTGTATAAGACCTTGCTTCTGGGTTGAACTAATCAGAGGGCGACCCGAAGAGAACACAATCTGGACTAGCGGGAGC  
AGCATATCCTTTTGTGGTGTAAACAGTGACACTGTGGGTTGGTCT

>HAP3\_0.0450393 | global\_haplotype frequency=0.045039

CTGTATGACAATTGGAATGGCTAACTTAATATTACAAATTGGAAACATAATCTCAATATGGGTTAGCCACTCAATTCAACTTGGGAATCAAAGTCATATTGAAACATGC  
AATCAAAGCGTCATTACTTATGAAAACAACACTTGGGTAAATCAGACATATGTTAACATCAGCAACACCAACTTTGCTGCTGGACAGTCAGTGGTTCCCGTGAAATTA  
GCGGGCAATTCCTCTCTCTGCCCTGTTAGTGGATGGGCTATATACAGTAAAGACAACAGTGTAAAGAATCGGTTCCAAGGGGGATGTGTTTGTGATAAGGGGAACCAT  
TCATATCATGCTCCCCCTTGAATGCAGAACCTTCTTCTTGACTCAAGGGGCCCTTGCTAAATGACAAACATTCCAATGGAACCATTAAAGACAGGAGCCCATATCGA  
ACCCTAATGAGCTGTCCTATTGGTGAAGTTCCTCTCCATACAACACTCAAGATTTGAGTCAGTCGCTTGGTCAGCAAGTGCTTGTGATGATGGCATCAATTGGCTAAC  
AATTGGAATTTCTGGCCCAGACAATGGGGCAGTGGCTGTGTTAAAGTACAATGGCATAATAACAGACACTATCAAGAGTTGGAGAAACAATATATTGAGAACACAAG  
AGTCTGAATGTGCATGTGTAATGGTTCTTGCTTTACCATAATGACCGATGGACCAAGTGTGACAGGGCCTCATACAAGATCTTCAGAATAGAAAAGGGAAAGATA  
GTCAAATCAGTCGAAATGAATGCCCTAATTACTATGAGGAATGCTCCTGTTATCCTGATTCTAGTGAATCACATGTGTGTGCAGGGATAACTGGCATGGCTC  
GAATCGACCGTGGGTGTCTTTCAACCAGAATCTGGAATATCAGATAGGATACATATGCAGTGGGGTTTTTCGGAGACAATCCACGCCCTAATGATAAGACAGGCAGTT  
GTGGTCCAGTATCGTCTAATGGAGCAAATGGAGTAAAAGGATTTTCATTAGATACGGCAATGGTGTGGATAGGGGAGAACTAAAAGCATTAGTTCAAGAAAAGGT  
TTTGAGATGATTTGGGATCCGAATGGATGGACTGGGACAGACAATAAATTCTCAATAAAGCAAGATATCGTAGGAATAAAGAGTGGTCAGGATATAGCGGGAGTTT  
TGTTTCAGCATCCAGAATAACAGGGCTGGATTGTATAAGACCTTGCTTCTGGGTTGAACTAATCAGAGGGCGACCCGAAGAGAACACAATCTGGACTAGCGGGAGC  
AGCATATCCTTTTGTGGTGTAAACAGTGACACTGTGGGTTGGTCT

>HAP4\_0.0256499 | global\_haplotype frequency=0.025650

CTGTATGACAATTGGAATGGCTAACTTAATATTACAAATTGGAAACATAATCTCAATATGGGTTAGCCACTCAATTCAACTTGGGAATCAAAGTCATATTGAAACATGC  
AATCAAAGCGTCATTAATTATGAAAACAACACTTGGGTAAATCAGACATATGTTAACATCAGCAACACCAACTTTGCTGCTGGACAGTCAGTGGTTCCCGTGAAATTA  
GCGGGCAATTCCTCTCTCTGCCCTGTTAGTGGATGGGCTATATACAGTAAAGACAACAGTGTAAAGAATCGGTTCCAAGGGGGATGTGTTTGTGATAAGGGGAACCAT  
TCATATCATGCTCCCCCTTGAATGCAGAACCTTCTTCTTGACTCAAGGGGCCCTTGCTAAATGACAAACATTCCAATGGAACCATTAAAGACAGGAGCCCATATCGA  
ACCCTAATGAGCTGTCCTATTGGTGAAGTTCCTCTCCATACAACACTCAAGATTTGAGTCAGTCGCTTGGTCAGCAAGTGCTTGTGATGATGGCATCAATTGGCTAAC  
AATTGGAATTTCTGGCCCAGACAATGGGGCAGTGGCTGTGTTAAAGTACAATGGCATAATAACAGACACTATCAAGAGTTGGAGAAACAATATATTGAGAACACAAG  
AGTCTGAATGTGCATGTGTAATGGTTCTTGCTTTACCATAATGACCGATGGACCAAGTGTGACAGGGCCTCATACAAGATCTTCAGAATAGAAAAGGGAAAGATA  
GTCAAATCAGTCGAAATGAATGCCCTAATTACTATGAGGAATGCTCCTGTTATCCTGATTCTAGTGAATCACATGTGTGTGCAGGGATAACTGGCATGGCTC  
GAATCGACCGTGGGTGTCTTTCAACCAGAATCTGGAATATCAGATAGGATACATATGCAGTGGGGTTTTTCGGAGACAATCCACGCCCTAATGATAAGACAGGCAGTT  
GTGGTCCAGTATCGTCTAATGGAGCAAATGGAGTAAAAGGATTTTCATTCAAATACGGCAATGGTGTGGATAGGGGAGAACTAAAAGCATTAGTTCAAGAAAAGGT  
TTTGAGATGATTTGGGATCCGAATGGATGGACTGGGGCAGACAATAACTTCTCAATAAAGCAAGATATCGTAGGAATAAAGAGTGGTCAGGATATAGCGGGAGTTT  
TGTTTCAGCATCCAGAATAACAGGGCTGGATTGTATAAGACCTTGCTTCTGGGTTGAACTAATCAGAGGGCGACCCGAAGAGAACACAATCTGGACTAGCGGGAGC  
AGCATATCCTTTTGTGGTGTAAACAGTGACACTGTGGGTTGGAGA

>HAP5\_0.0252457 | global\_haplotype frequency=0.025246

CTGTATGACAATTGGAATGGCTAACTTAATATTACAAATTGGAAACATAATCTCAATATGGGTTAGCCACTCAATTCAACTTGGGAATCAAAGTCATATTGAAACATGC  
AATCAAAGCGTCATTAATTATGAAAACAACACTTGGGTAAATCAGACATATGTTAACATCAGCAACACCAACTTTGCTGCTGGACAGTCAGTGGTTCCCGTGAAATTA  
GCGGGCAATTCCTCTCTCTGCCCTGTTAGTGGATGGGCTATATACAGTAAAGACAACAGTGTAAAGAATCGGTTCCAAGGGGGATGTGTTTGTGATAAGGGGAACCAT  
TCATATCATGCTCCCCCTTGAATGCAGAACCTTCTTCTTGACTCAAGGGGCCCTTGCTAAATGACAAACATTCCAATGGAACCATTAAAGACAGGAGCCCATATCGA  
ACCCTAATGAGCTGTCCTATTGGTGAAGTTCCTCTCCATACAACACTCAAGATTTGAGTCAGTCGCTTGGTCAGCAAGTGCTTGTGATGATGGCATCAATTGGCTAAC  
AATTGGAATTTCTGGCCCAGACAATGGGGCAGTGGCTGTGTTAAAGTACAATGGCATAATAACAGACACTATCAAGAGTTGGAGAAACAATATATTGAGAACACAAG  
AGTCTGAATGTGCATGTGTAATGGTTCTTGCTTTACCATAATGACCGATGGACCAAGTGTGACAGGGCCTCATACAAGATCTTCAGAATAGAAAAGGGAAAGATA  
GTCAAATCAGTCGAAATGAATGCCCTAATTACTATGAGGAATGCTCCTGTTATCCTGATTCTAGTGAATCACATGTGTGTGCAGGGATAACTGGCATGGCTC  
GAATCGACCGTGGGTGTCTTTCAACCAGAATCTGGAATATCAGATAGGATACATATGCAGTGGGGTTTTTCGGAGACAATCCACGCCCTAATGATAAGACAGGCAGTT  
GTGGTCCAGTATCGTCTAATGGAGCAAATGGAGTAAAAGGATTTTCATTCAAATACGGCAATGGTGTGGATAGGGGAGAACTAAAAGCATTAGTTCAAGAAAAGGT  
TTTGAGATGATTTGGGATCCGAATGGATGGACTGGGACAGACAATAACTTCTCAATAAAGCAAGATATCGTAGGAATAAAGAGTGGTCAGGATATAGCGGGAGTTT  
TGTTTCAGCATCCAGAATAACAGGGCTGGATTGTATAAGGCCTTGCTTCTGGGTTGAACTAATCAGAGGGCGACCCGAAGAGAACACAATCTGGACTAGCGGGAGC  
AGCATATCCTTTTGTGGTGTAAACAGTGACACTGTGGGTTGGTCT

>HAP6\_0.0227872 | global\_haplotype frequency=0.022787

CTGTATGACAATTGGAATGGCTAACTTAATATTACAAATTGGAAACATAATCTCAATATGGGTTAGCCACTCAATTCAACTTGGGAATCAAAGTCATATTGAAACATGC  
AATCAAAGCGTCATTAATTATGAAAACAACACTTGGGTAAATCAGACATATGTTAACATCAGCAACACCAACTTTGCTGCTGGACAGTCAGTGGTTCCCGTGAAATTA  
GCGGGCAATTCCTCTCTCTGCCCTGTTAGTGGATGGGCTATATACAGTAAAGACAACAGTGTAAAGAACCGTTCCAAGGGGGATGTGTTTGTGATAAGGGGAACCAT  
TCATATCATGCTCCCCCTTGAATGCAGAACCTTCTTCTTGACTCAAGGGGCCCTTGCTAAATGACAAACATTCCAATGGAACCATTAAAGACAGGAGCCCATATCGA  
ACCCTAATGAGCTGTCCTATTGGTGAAGTTCCTCTCCATACAACACTCAAGATTTGAGTCAGTCGCTTGGTCAGCAAGTGCTTGTGATGATGGCATCAATTGGCTAAC  
AATTGGAATTTCTGGCCCAGACAATGGGGCAGTGGCTGTGTTAAAGTACAATGGCATCGGAACAGACACTATCAAGAGTTGGAGAAACAATATATTGAGAACAACAAG  
AGTCTGAATGTGCATGTGTAATGGTTCTTGCTTTACCATAATGACCGATGGACCAAGTGTGACAGGGCCTCATACAAGATCTTCAGAATAGAAAAGGGAAAGATA  
GTCAAATCAGTCGAAATGAATGCCCTAATTACTATGAGGAATGCTCCTGTTATCCTGATTCTAGTGAATCACATGTGTGTGCAGGGATAACTGGCATGGCTC  
GAATCGACCGTGGGTGTCTTTCAACCAGAATCTGGAATATCAGATAGGATACATATGCAGTGGGGTTTTTCGGAGACAATCCACGCCCTAATGATAAGACAGGCAGTT  
GTGGTCCAGTATCGTCTAATGGAGCAAATGGAGTAAAAGGATTTTCATTCAAATACGGCAATGGTGTGGATAGGGGAGAACTAAAAGCATTAGTTCAAGAAAAGGT  
TTTGAGATGATTTGGGATCCGAATGGATGGACTGGGACAGACAATAAATTCTCAATAAAGCAAGATATCGTAGGAATAAAGAGTGGTCAGGATATAGCGGGAGTTT  
TGTTTCAGCATCCAGAATAACAGGGCTGGATTGTATAAGACCTTGCTTCTGGGTTGAACTAATCAGAGGGCGACCCGAAGAGAACACAATCTGGACTAGCGGGAGC  
AGCATATCCTTTTGTGGTGTAAACAGTGACACTGTGGGTTGGTCT

>HAP7\_0.0185432 | global\_haplotype frequency=0.018543

CTGTATGACAATTGGAATGGCTAACTTAATATTACAAATTGGAAACATAATCTCAATATGGGTTAGCCACTCAATTCAACTTGGGAATCAAAGTCATATTGAAACATGC  
AATCAAAGCGTCATTAATTATGAAAACAACACTTGGGTAAATCAGACATATGTTAACATCAGCAACACCAACTTTGCTGCTGGACAGTCAGTGGTTCCCGTGAAATTA  
GCGGGCAATTCCTCTCTCTGCCCTGTTAGTGGATGGGCTATATACAGTAAAGACAACAGTGTAAAGAACCGTTCCAAGGGGGATGTGTTTGTGATAAGGGGAACCAT  
TCATATCATGACAGCCCCTTGAATGCAGAACCTTCTTCTTGACTCAAGGGGCCCTTGCTAAATGACAAACATTCCAATGGAACCATTAAAGACAGGAGCCCATATCGA  
ACCCTAATGAGCTGTCCTATTGGTGAAGTTCCTCTCCATACAACACTCAAGATTTGAGTCAGTCGCTTGGTCAGCAAGTGCTTGTGATGATGGCATCAATTGGCTAAC  
AATTGGAATTTCTGGCCCAGACAATGGGGCAGTGGCTGTGTTAAAGTACAATGGCATAATAACAGACACTATCAAGAGTTGGAGAAACAATATATTGAGAACAACAAG  
AGTCTGAATGTGCATGTGTAATGGTTCTTGCTTTACCATAATGACCGATGGACCAAGTGTGACAGGGCCTCATACAAGATCTTCAGAATAGAAAAGGGAAAGATA  
GTCAAATCAGTCGAAATGAATGCCCTAATTACTATGAGGAATGCTCCTGTTATCCTGATTCTAGTGAATCACATGTGTGTGCAGGGATAACTGGCATGGCTC  
GAATCGACCGTGGGTGTCTTTCAACCAGAATCTGGAATATCAGATAGGATACATATGCAGTGGGGTTTTTCGGAGACAATCCACGCCCTAATGATAAGACAGGCAGTT  
GTGGTCCAGTATCGTCTAATGGAGCAAATGGAGTAAAAGGATTTTCATTCAAATACGGCAATGGTGTGGATAGGGGAGAACTAAAAGCATTAGTTCAAGAAAAGGT  
TTTGAGATGATTTGGGATCCGAATGGATGGACTGGGACAGACAATAAATTCTCAATAAAGCAAGATATCGTAGGAATAAAGAGTGGTCAGGATATAGCGGGAGTTT  
TGTTTCAGCATCCAGAATAACAGGGCTGGATTGTATAAGACCTTGCTTCTGGGTTGAACTAATCAGAGGGCGACCCGAAGAGAACACAATCTGGACTAGCGGGAGC  
AGCATATCCTTTTGTGGTGTAAACAGTGACACTGTGGGTTGGTCT

>HAP8\_0.0184056 | global\_haplotype frequency=0.018406

CTGTATGACAATTGGAATGGCTAACTTAATATTACAAATTGGAAACATAATCTCAATATGGGTTAGCCACTCAATTCAACTTGGGAATCAAAGTCATATTGAAACATGC  
AATCAAAGCGTCATTAATTATGAAAACAACACTTGGGTAAATCAGACATATGTTAACATCAGCAACACCAACTTTGCTGCTGGACAGTCAGTGGTTCCCGTGAAATTA  
GCGGGCAATTCCTCTCTCTGCCCTGTTAGTGGATGGGCTATATACAGTAAAGACAACAGTGTAAAGAATCGGTTCCAAGGGGGATGTGTTTGTGATAAGGGGAACCAT  
TCATATCATGCTCCCCCTTGAATGCAGAACCTTCTTCTTGACTCAAGGGGCCCTTGCTAAATGACAAACATTCCAATGGAACCATTAAAGACAGGAGCCCATATCGA  
ACCCTAATGAGCTGTCCTATTGGTGAAGTTCCTCTCCATACAACACTCAAGATTTGAGTCAGTCGCTTGGTCAGCAAGTGCTTGTGATGATGGCATCAATTGGCTAAC  
AATTGGAATTTCTGGCCAGACAATGGGGCAGTGGCTGTGTTAAAGTACAATGGCATAATAACAGACACTATCAAGAGTTGGAGAAACAATATATTGAGAACAACAAG  
AGTCTGAATGTGCATGTGTAATGGTTCCTTGCTTTACCATAATGACCGATGGACCAAGTGTGATGGACAGGCCTCATACAAGATCTTCAGAATAGAAAAGGGAAAGATA  
GTCAAATCAGTCGAAATGAATGCCCTAATTACTATGAGGAATGCTCCTGTTATCCTGATTCTAGTGAATCACATGTGTGTGCAGGGATAACTGGCATGGCTC  
GAATCGACCGTGGGTGTCTTTCAACCAGAATCTGGAATATCAGATAGGATACATATGCAGTGGGGTTTTTCGGAGACAATCCACGCCCTAATGATAAGACAGGCAGTT  
GTGGTCCAGTATCGTCTAATGGAGCAAATGGAGTAAAAGGATTTTCATTCAAATACGGCAATGGTGTGGATAGGGGAGAACTAAAAGCATTAGTTCAAGAAAAGGT  
TTTGAGATGATTTGGGATCCGAATGGATGGACTGGGACAGACAATAAATTCTCAATAAAGCAAGATATCGTAGGAATTCTTGATCTGTGATGATAGCGGGAGTTT  
TGTTGAGCATCCAGAACTAACAGGGCTGGATTGTATAAGACCTTGCTTCTGGGTTGAACTAATCAGAGGGCGACCCGAAGAGAACACAATCTGGACTAGCGGGAGC  
AGCATATCCTTTTGTGGTGTAAACAGTGACACTGTGGGTTGGTCT

>HAP9\_0.0183322 | global\_haplotype frequency=0.018332

CTGTATGACAATTGGAATGGCTAACTTAATATTACAAATTGGAAACATAATCTCAATATGGGTTAGCCACTCAATTCAACTTGGGAATCAAAGTCATATTGAAACATGC  
AATCAAAGCGTCATTAATTATGAAAACAACACTTGGGTAAATCAGACATATGTTAACATCAGCAACACCAACTTTGCTGCTGGACAGTCAGTGGTTCCCGTGAAATTA  
GCGGGCAATTCCTCTCTCTGCCCTGTTAGTGGATGGGCTATATACAGTAAAGACAACAGTGTAAAGAATCGGTTCCAAGGGGGATGTGTTTGTGATAAGGGGAACCAT  
TCATATCATGCTCCCCCTTGAATGCAGAACCTTCTTCTTGACTCAAGGGGCCCTTGCTAAATGACAAACATTCCAATGGAACCATTAAAGACAGGAGCCCATATCGA  
ACCCTAATGAGCTGTCCTATTGGTGAAGTTCCTCTCCATACAACACTCAAGATTTGAGTCAGTCGCTTGGTCAGCAAGTGCTTGTGATGATGGCATCAATTGGCTAAC  
AATTGGAATTTCTGGCCAGACAATGGGGCAGTGGATCGGAAGAGCACACGGGCATAATAACAGACACTATCAAGAGTTGGAGAAACAATATATTGAGAACAACA  
GAGTCTGAATGTGCATGTGTAATGGTTCCTTGCTTTACCATAATGACCGATGGACCAAGTGTGATGGACAGGCCTCATACAAGATCTTCAGAATAGAAAAGGGAAAGAT  
AGTCAAATCAGTCGAAATGAATGCCCTAATTACTATGAGGAATGCTCCTGTTATCCTGATTCTAGTGAATCACATGTGTGTGCAGGGATAACTGGCATGGCTC  
GAATCGACCGTGGGTGTCTTTCAACCAGAATCTGGAATATCAGATAGGATACATATGCAGTGGGGTTTTTCGGAGACAATCCACGCCCTAATGATAAGACAGGCAGTT  
GTGGTCCAGTATCGTCTAATGGAGCAAATGGAGTAAAAGGATTTTCATTCAAATACGGCAATGGTGTGGATAGGGGAGAACTAAAAGCATTAGTTCAAGAAAAGGT  
TTTGAGATGATTTGGGATCCGAATGGATGGACTGGGACAGACAATAAATTCTCAATAAAGCAAGATATCGTAGGAATAAAGAGTGGTCAGGATATAGCGGGAGTTT  
TGTTGAGCATCCAGAACTAACAGGGCTGGATTGTATAAGACCTTGCTTCTGGGTTGAACTAATCAGAGGGCGACCCGAAGAGAACACAATCTGGACTAGCGGGAGC  
AGCATATCCTTTTGTGGTGTAAACAGTGACACTGTGGGTTGGTCT

>HAP10\_0.0147949 | global\_haplotype frequency=0.014795

CTGTATGACAATTGGAATGGCTAACTTAATATTACAAATTGGAAACATAATCTCAATATGGGTTAGCCACTCAATTCAACTTGGGAATCAAAGTCATATTGAAACATGC  
AATCAAAGCGTCATTACTTATGAAAACAACACTTGGGTAAATCAGACATATGTTAACATCAGCAACACCAACTTTGCTGCTGGACAGTCAGTGGTTCCCGTGAAATTA  
GCGGGCAATTCCTCTCTCTGCCCTGTTAGTGGATGGGCTATATACAGTAAAGACAACAGTGTAAAGAATCGGTTCCAAGGGGGATGTGTTTGTGATAAGGGAACCAT  
TCATATCATGCTCCCCCTTGAATGCAGAACCTTCTTCTTGACTCAAGGGGCCCTTGCTAAATGACAAACATTCCAATGGAACCATTAAAGACAGGAGCCCATATCGA  
ACCCTAATGAGCTGTCCTATTGGTGAAGTTCCTCTCCATACAACACTCAAGATTTGAGTCAGTCGCTTGGTCAGCAAGTGCTTGTGATGATGGCATCAATTGGCTAAC  
AATTGGAATTTCTAGATCAGAGCATGGGGCAGTGGCTGTGTTAAAGTACAATGGCATAATAACAGACACTATCAAGAGTTGGAGAAACAATATATTGAGAACACAAGA  
GTCTGAATGTGCATGTGTAATGGTTCTTGCTTTACCATAATGACCGATGGACCAAGTGATGGACAGGCCTCATACAAGATCTTCAGAATAGAAAAGGGAAAGATAG  
TCAAATCAGTCGAAATGAATGCCCTAATTACTATGAGGAATGCTCCTGTTATCCTGATTCTAGTGAATCACATGTGTGTGCAGGGATAACTGGCATGGCTCGA  
ATCGACCGTGGGTGTCTTTCAACCAGAATCTGGAATATCAGATAGGATACATATGCAGTGGGGTTTTTCGGAGACAATCCACGCCCTAATGATAAGACAGGCAGTTGT  
GGTCCAGTATCGTCTAATGGAGCAAATGGAGTAAAAGGATTTTCATTCAAATACGGCAATGGTGTGGATAGGGGAGAACTAAAAGCATTAGTTCAAGAAAAGGTTTT  
GAGATGATTTGGGATCCGAATGGATGGACTGGGACAGACAATAACTTCTCAATAAAGCAAGATATCGTAGGAATAAAGAGTGGTCAGGATATAGCGGGAGTTTTGT  
TCAGCATCCAGAACTAACAGGGCTGGATTGTATAAGACCTTGCTTCTGGGTTGAACTAATCAGAGGGCGACCCGAAGAGAACACAATCTGGACTAGCGGGAGCAGC  
ATATCCTTTTTGTGGTGTAACAGTGACACTGTGGGTTGGTCT

>HAP11\_0.0143732 | global\_haplotype frequency=0.014373

CTGTATGACAATTGGAATGGCTAACTTAATATTACAAATTGGAAACATAATCTCAATATGGGTTAGCCACTCAATTCAACTTGGGAATCAAAGTCATATTGAAACATGC  
AATCAAAGCGTCATTACTTATGAAAACAACACTTGGGTAAATCAGACATATGTTAACATCAGCAACACCAACTTTGCTGCTGGACAGTCAGTGGTTCCCGTGAAATTA  
GCGGGCAATTCCTCTCTCTGCCCTGTTAGTGGATGGGCTATATACAGTAAAGACAACAGTGTAAAGAATCGGTTCCAAGGGGGATGTGTTTGTGATAAGGGAACCAT  
TCATATCATGCTCCCCCTTGAATGCAGAACCTTCTTCTTGACTCAAGGGGCCCTTGCTAAATGACAAACATTCCAATGGAACCATTAAAGACAGGAGCCCATATCGA  
ACCCTAATGAGCTGTCCTATTGGTGAAGTTCCTCTCCATACAACACTCAAGATTTGAGTCAGTCGCTTGGTCAGCAAGTGCTTGTGATGATGGCATCAATTGGCTAAC  
AATTGGAATTTCTGGCCCAGACAATGGGGCAGTGGCTGTGTTAAAGTACAATGGCATAATAACAGACACTATCAAGAGTTGGAGAAACAATATATTGAGAACACAAG  
AGTCTGAATGTGCATGTGTAATGGTTCTTGCTTTACCATAATGACCGATGGACCAAGTGATGGACAGGCCTCATACAAGATCTTCAGAATAGAAAAGGGAAAGATA  
GTCAAATCAGTCGAAATGAATGCCCTAATTACTATGAGGAATGCTCCTGTTATCCTGATTCTAGTGAATCACATGTGTGTGCAGGGATAACTGGCATGGCTC  
GAATCGACCGTGGGTGTCTTTCAACCAGAATCTGGAATATCAGATAGGATACATATGCAATGGGATTTTCGGAGACAATCCACGCCCTAATGATAAGACAGGCAGTT  
GTGGTCCAGTATCGTCTAATGGAGCAAATGGAGTAAAAGGATTTTCATTCAAATACGGCAATGGTGTGGATAGGGGAGAACTAAAAGCATTAGTTCAAGAAAAGGT  
TTTGAGATGATTTGGGATCCGAATGGATGGACTGGGACAGACAATAACTTCTCAATAAAGCAAGATATCGTAGGAATAAAGAGTGGTCAGGATATAGCGGGAGTTT  
TGTTTCAGCATCCAGAACTAACAGGGCTGGATTGTATAAGACCTTGCTTCTGGGTTGAACTAATCAGAGGGCGACCCGAAGAGAACACAATCTGGACTAGCGGGAGC  
AGCATATCCTTTTTGTGGTGTAACAGTGACACTGTGGGTTGGTCT

>HAP12\_0.0139483 | global\_haplotype frequency=0.013948

CTGTATGACAATTGGAATGGCTAACTTAATATTACAAATTGGAAACATAATCTCAATATGGGTTAGCCACTCAATTCAACTTGGGAATCAAAGTCATATTGAAACATGC  
AATCAAAGCGTCATTAATTATGAAAACAACACTTGGGTAAATCAGACATATGTTAACATCAGCAACACCAACTTTGCTGCTGGACAGTCAGTGGTTCCCGTGAAATTA  
GCGGGCAATTCCTCTCTCTGCCCTGTTAGTGGATGGGCTATATACAGTAAAGACAACAGTGTAAAGAACCGTTCCAAGGGGGATGTGTTTGTGATAAGGGGAACCAT  
TCATATCATGCTCCCCCTTGAATGCAGAACCTTCTTCTTGACTCAAGGGGCCCTTGCTAAATGACAAACATTCCAATGGAACAGATAAAGACAGGAGCCCATATCGA  
ACCCTAATGAGCTGTCCTATTGGTGAAGTTCCTCTCCATACAACACTCAAGATTTGAGTCAGTCGCTTGGTCAGCAAGTGCTTGTGATGATGGCATCAATTGGCTAAC  
AATTGGAATTTCTGGCCAGACAATGGGGCAGTGGCTGTGTTAAAGTACAATGGCATAATAACAGACACTATCAAGAGTTGGAGAAACAATATATTGAGAACACAAG  
AGTCTGAATGTGCATGTGTAATGGTTCTTGCTTTACCATAATGACCGATGGACCAAGTGTGACAGGGCCTCATACAAGATCTTCAGAATAGAAAAGGGAAAGATA  
GTCAAATCAGTCGAAATGAATGCCCTAATTACTATGAGGAATGCTCCTGTTATCCTGATTCTAGTGAATCACATGTGTGTGCAGGGATAACTGGCATGGCTC  
GAATCGACCGTGGGTGTCTTTCAACCAGAATCTGGAATATCAGATAGGATACATATGCAGTGGGGTTTTCGGAGACAATCCACGCCCTAATGATAAGACAGGCAGTT  
GTGGTCCAGTATCGTCTAATGGAGCAAATGGAGTAAAAGGATTTTCAATCAAATACGGCAATGGTGTGGATAGGGGAGAACTAAAAGCATTAGTTCAAGAAAAGGT  
TTTGAGATGATTTGGGATCCGAATGGATGGACTGGGACAGACAATAAATTCTCAATAAAGCAAGATATCGTAGGAATAAAGAGTGGTCAGGATATAGCGGGAGTTT  
TGTTTCAGCATCCAGAATAACAGGGCTGGATTGTATAAGACCTTGCTTCTGGGTTGAACTAATCAGAGGGCGACCCGAAGAGAACACAATCTGGACTAGCGGGAGC  
AGCATATCCTTTTGTGGTGTAAACAGTGACACTGTGGGTTGGTCT

>HAP13\_0.0118923 | global\_haplotype frequency=0.011892

CTGTATGACAATTGGAATGGCTAACTTAATATTACAAATTGGAAACATAATCTCAATATGGGTTAGCCACTCAATTCAACTTGGGAATCAAAGTCATATTGAAACATGC  
AATCAAAGCGTCATTAATTATGAAAACAACACTTGGGTAAATCAGACATATGTTAACATCAGCAACACCAACTTTGCTGCTGGACAGTCAGTGGTTCCCGTGAAATTA  
GCGGGCAATTCCTCTCTCTGCCCTGTTAGTGGATGGGCTATATACAGTAAAGACAACAGTGTAAAGAACCGTTCCAAGGGGGATGTGTTTGTGATAAGGGGAACCAT  
TCATATCATGCTCCCCCTTGAATGCAGAACCTTCTTCTTGACTCAAGGGGCCCTTGCTAAATGACAAACATTCCAATGGAACATTAAAGACAGGAGCCCATATCGA  
ACCCTAATGAGCTGTCCTATTGGTGAAGTTCCTCTCCATACAACACTCAAGATTTGAGTCAGTCGCTTGGTCAGCAAGTGCTTGTGATAGAGGCATCAATTGGCTAAC  
AATTGGAATTTCTGGCCAGACAATGGGGCAGTGGCTGTGTTAAAGTACAATGGCATAATAACAGACACTATCAAGAGTTGGAGAAACAATATATTGAGAACACAAG  
AGTCTGAATGTGCATGTGTAATGGTTCTTGCTTTACCATAATGACCGATGGACCAAGTGTGACAGGGCCTCATACAAGATCTTCAGAATAGAAAAGGGAAAGATA  
GTCAAATCAGTCGAAATGAATGCCCTAATTACTATGAGGAATGCTCCTGTTATCCTGATTCTAGTGAATCACATGTGTGTGCAGGGATAACTGGCATGGCTC  
GAATCGACCGTGGGTGTCTTTCAACCAGAATCTGGAATATCAGATAGGATACATATGCAGTGGGGTTTTCGGAGACAATCCACGCCCTAATGATAAGACAGGCAGTT  
GTGGTCCAGTATCGTCTAATGGAGCAAATGGAGTAAAACGACTTTTCAATCAAATACGGCAATGGTGTGGATAGGGGAGAACTAAAAGCATTAGTTCAAGAAAAGGT  
TTTGAGATGATTTGGGATCCGAATGGATGGACTGGGACAGACAATAAATTCTCAATAAAGCAAGATATCGTAGGAATAAAGAGTGGTCAGGATATAGCGGGAGTTT  
TGTTTCAGCATCCAGAATAACAGGGCTGGATTGTATAAGACCTTGCTTCTGGGTTGAACTAATCAGAGGGCGACCCGAAGAGAACACAATCTGGACTAGCGGGAGC  
AGCATATCCTTTTGTGGTGTAAACAGTGACACTGTGGGTTGGTCT



>HAP14\_0.0118606 | global\_haplotype frequency=0.011861

CTGTATGACAATTGGAATGGCTAACTTAATATTACAAATTGGAAACATAATCTCAATATGGGTTAGCCACTCAATTCAACTTGGGAATCAAAGTCATATTGAAACATGC  
AATCAAAGCGTCATTACTTATGAAAACAACACTTGGGTAAATCAGACATATGTTAACATCAGCAACACCAACTTTGCTGCTGGACAGTCAGTGGTTCCCGTGAAATTA  
GCGGGCAATTCCTCTCTCTGCCCTGTTAGTGGATGGGCTATATACAGTAAAGACAACAGTGTAAAGAATCGGTTCCAAGGGGGATGTGTTTGTGATAAGGGGAACCAT  
TCATATCATGCTCCCCCTTGAATGCAGAACCTTCTTCTTGACTCAAGGGGCCCTTGCTAAATGACAAACATTCCAATGGAACCATTAAAGACAGGAGCCCATATCGA  
ACCCTAATGAGCTGTCCTATTGGTGAAGTTCCTCTCCATACAACACTCAAGATTTGAGAGATCCGCTTGGTCAGCAAGTGCTTGTGATGATGGCATCAATTGGCTAAC  
AATTGGAATTTCTGGCCCAGACAATGGGGCAGTGGCTGTGTTAAAGTACAATGGCATAATAACAGACACTATCAAGAGTTGGAGAAACAATATATTGAGAACAACAAG  
AGTCTGAATGTGCATGTGTAATGGTTCTTGCTTTACCATAATGACCGATGGACCAAGTGTGACAGGGCCTCATACAAGATCTTCAGAATAGAAAAGGGAAAGATA  
GTCAAATCAGTCGAAATGAATGCCCTAATTACTATGAGGAATGCTCCTGTTATCCTGATTCTAGTGAATCACATGTGTGTGCAGGGATAACTGGCATGGCTC  
GAATCGACCGTGGGTGTCTTTCAACCAGAATCTGGAATATCAGATAGGATACATATGCAGTGGGGTTTTTCGGAGACAATCCACGCCCTAATGATAAGACAGGCAGTT  
GTGGTCCAGTATCGTCTAATGGAGCAAATGGAGTAAAAGGATTTTCATTCAAATACGGCAATGGTGTGGATAGGGGAGAACTAAAAGCATTAGTTCAAGAAAAGGT  
TTTGAGATGATTTGGGATCCGAATGGATGGACTGGGACAGACAATAAATTCTCAATAAAGCAAGATATCGTAGGAATAAAGAGTGGTCAGGATATAGCGGGAGTTT  
TGTTTCAGCATCCAGAATAACAGGGCTGGATTGTATAAGACCTTGCTTCTGGGTTGAACTAATCAGAGGGCGACCCGAAGAGAACACAATCTGGACTAGCGGGAGC  
AGCATATCCTTTTGTGGTGTAAACAGTGACACTGTGGGTTGGTCT

>HAP15\_0.0118283 | global\_haplotype frequency=0.011828

CTGTATGACAATTGGAATGGCTAACTTAATATTACAAATTGGAAACATAATCTCAATATGGGTTAGCCACTCAATTCAACTTGGGAATCAAAGTCATATTGAAACATGC  
AATCAAAGCGTCATTACTTATGAAAACAACACTTGGGTAAATCAGACATATGTTAACATCAGCAACACCAACTTTGCTGCTGGACAGTCAGTGGTTCCCGTGAAATTA  
GCGGGCAATTCCTCTCTCTGCCCTGTTAGTGGATGGGCTATATACAGTAAAGACAACAGTGTAAAGAATCGGTTCCAAGGGGGATGTGTTTGTGATAAGGGGAACCAT  
TCATATCATGCTCCCCCTTGAATGCAGAACCTTCTTCTTGACTCAAGGGGCCCTTGCTAAATGACAAACATTCCAATGGAACCATTAAAGACAGGAGCCCATATCGA  
ACCCTAATGAGCTGTCCTATTGGTGAAGTTCCTCTCCATACAACACTCAAGATTTGAGTCAGTCGCTTGGTCAGCAAGTGCTTGTGATGATGGCATCAATTGGCTAAC  
AATTGGAATTTCTGGCCCAGACAATGGGGCAGTGGCTGTGTTAAAAGAGAAGAGCACAAATAACAGACACTATCAAGAGTTGGAGAAACAATATATTGAGAACAACAAG  
AGTCTGAATGTGCATGTGTAATGGTTCTTGCTTTACCATAATGACCGATGGACCAAGTGTGACAGGGCCTCATACAAGATCTTCAGAATAGAAAAGGGAAAGATA  
GTCAAATCAGTCGAAATGAATGCCCTAATTACTATGAGGAATGCTCCTGTTATCCTGATTCTAGTGAATCACATGTGTGTGCAGGGATAACTGGCATGGCTC  
GAATCGACCGTGGGTGTCTTTCAACCAGAATCTGGAATATCAGATAGGATACATATGCAGTGGGGTTTTTCGGAGACAATCCACGCCCTAATGATAAGACAGGCAGTT  
GTGGTCCAGTATCGTCTAATGGAGCAAATGGAGTAAAAGGATTTTCATTCAAATACGGCAATGGTGTGGATAGGGGAGAACTAAAAGCATTAGTTCAAGAAAAGGT  
TTTGAGATGATTTGGGATCCGAATGGATGGACTGGGACAGACAATAAATTCTCAATAAAGCAAGATATCGTAGGAATAAAGAGTGGTCAGGATATAGCGGGAGTTT  
TGTTTCAGCATCCAGAATAACAGGGCTGGATTGTATAAGACCTTGCTTCTGGGTTGAACTAATCAGAGGGCGACCCGAAGAGAACACAATCTGGACTAGCGGGAGC  
AGCATATCCTTTTGTGGTGTAAACAGTGACACTGTGGGTTGGTCT

>HAP16\_0.0117239 | global\_haplotype frequency=0.011724

CTGTATGACAATTGGAATGGCTAACTTAATATTACAAATTGGAAACATAATCTCAATATGGGTTAGCCACTCAATTCAACTTGGGAATCAAAGTCATATTGAAACATGC  
AATCAAAGCGTCATTAATTATGAAAACAACACTTGGGTAAATCAGACATATGTTAACATCAGCAACACCAACTTTGCTGCTGGACAGTCAGTGGTTCCCGTGAAATTA  
GCGGGCAATTCCTCTCTCTGCCCAGATCGGAAATGGGCTATATACAGTAAAGACAACAGTGTAAGAATCGGTTCCAAGGGGGATGTGTTTGTGATAAGGGGAACCAT  
TCATATCATGCTCCCCCTTGAATGCAGAACCTTCTTCTTGAAGGCGCTTGAATGACAAACATTCCAATGGAACCATTAAAGACAGGAGCCCATATCGA  
ACCCTAATGAGCTGTCCTATTGGTGAAGTTCCTCTCCATACAACACTCAAGATTTGAGTCAGTCGCTTGGTCAGCAAGTGCTTGTGATGATGGCATCAATTGGCTAAC  
AATTGGAATTTCTGGCCAGACAATGGGGCAGTGGCTGTGTTAAAGTACAATGGCATAATAACAGACACTATCAAGAGTTGGAGAAACAATATATTGAGAACACAAG  
AGTCTGAATGTGCATGTGTAATGGTTCCTTGGCTTTACCATAATGACCGATGGACCAAGTGATGGACAGGCCTCATAACAAGATCTTCAGAATAGAAAAGGGAAAGATA  
GTCAAATCAGTCGAAATGAATGCCCTAATTACTATGAGGAATGCTCCTGTTATCCTGATTCTAGTGAATCACATGTGTGTGCAGGGATAACTGGCATGGCTC  
GAATCGACCGTGGGTGTCTTTCAACCAGAATCTGGAATATCAGATAGGATACATATGCAGTGGGGTTTTCGGAGACAATCCACGCCCTAATGATAAGACAGGCAGTT  
GTGGTCCAGTATCGTCTAATGGAGCAAATGGAGTAAAAGGATTTTCAATCAAATACGGCAATGGTGTGGATAGGGGAGAACTAAAAGCATTAGTTCAAGAAAAGGT  
TTTGAGATGATTTGGGATCCGAATGGATGGACTGGGACAGACAATAAATTCTCAATAAAGCAAGATATCGTAGGAATAAAGAGTGGTCAGGATATAGCGGGAGTTT  
TGTTGAGCATCCAGAATAACAGGGCTGGATTGTATAAGACCTTGCTTCTGGGTTGAACTAATCAGAGGGCGACCCGAAGAGAACACAATCTGGACTAGCGGGAGC  
AGCATATCCTTTTGTGGTGTAAACAGTGACACTGTGGGTTGGTCT

>HAP17\_0.0113552 | global\_haplotype frequency=0.011355

CTGTATGACAATTGGAATGGCTAACTTAATATTACAAATTGGAAACATAATCTCAATATGGGTTAGCCACTCAATTCAACTTGGGAATCAAAGTCATATTGAAACATGC  
AATCAAAGCGTCATTAATTATGAAAACAACACTTGGGTAAATCAGACATATGTTAACATCAGCAACACCAACTTTGCTGCTGGACAGTCAGTGGTTCCCGTGAAATTA  
GCGGGCAATTCCTCTCTCTGCCCAGATCGGAAATGGGCTATATACAGTAAAGACAACAGTGTAAGAATCGGTTCCAAGGGGGATGTGTTTGTGATAAGGGGAACCAT  
TCATATCATGCTCCCCCTTGAATGCAGAACCTTCTTCTTGAAGGCGCTTGAATGACAAACATTCCAATGGAACCATTAAAGACAGGAGCCCATATCGA  
ACCCTAATGAGCTGTCCTATTGGTGAAGTTCCTCTCCATACAACACTCAAGATTTGAGTCAGTCGTTTGGTCAGCAAGTGCTTGTGATGATGGCATCAATTGGCTAAC  
AATTGGAATTTCTGGCCAGACAATGGGGCAGTGGCTGTGTTAAAG-  
AGATCGGAAGAGCACCAGACACTATCAAGAGTTGGAGAAACAATATATTGAGAACACAAGAGTCTGAATGTGCATGTGTAATGGTTCCTTGGCTTTACCATAATGACC  
GATGGACCAAGTGATGGACAGGCCTCATAACAAGATCTTCAGAATAGAAAAGGGAAAGATAGTCAAATCAGTCGAAATGAATGCCCTAATTACTATGAGGAATG  
CTCCTGTTATCCTGATTCTAGTGAATCACATGTGTGTGCAGGGATAACTGGCATGGCTCGAATCGACCGTGGGTGTCTTTCAACCAGAATCTGGAATATCAGATAG  
GATACATATGCAGTGGGGTTTTCGGAGACAATCCACGCCCTAATGATAAGACAGGCAGTTGTGGTCCAGTATCGTCTAATGGAGCAAATGGAGTAAAAGGATTTTCA  
TTCAAATACGGCAATGGTGTGGATAGGGGAGAACTAAAAGCATTAGTTCAAGAAAAGGTTTTGAGATGATTTGGGATCCGAATGGATGGACTGGGACAGACAATAA  
CTTCTCAATAAAGCAAGATATCGTAGGAATAAAGAGTGGTCAGGATATAGCGGGAGTTTTGTTGAGCATCCAGAATAACAGGGCTGGATTGTATAAGACCTTGCT  
TCTGGGTTGAACTAATCAGAGGGCGACCCGAAGAGAACACAATCTGGACTAGCGGGAGCAGCATATCCTTTTGTGGTGTAAACAGTGACACTGTGGGTTGGTCT

>HAP18\_0.00844903 | global\_haplotype frequency=0.008449

CTGTATGACAATTGGAATGGCTAACTTAATATTACAAATTGGAAACATAATCTCAATATGGGTTAGCCACTCAATTCAACTTGGGAATCAAAGTCATATTGAAACATGC  
AATCAAAGCGTCATTACTTATGAAAACAACACTTGGGTAAATCAGACATATGTTAACATCAGCAACACCAACTTTGCTGCTGGACAGTCAGTGGTTCCCGTGAAATTA  
GCGGGCAATTCCTCTCTCTGCCCTGTTAGTGGATGGGCTATATACAGTAAAGACAACAGTGTAAAGAATCGGTTCCAAGGGGGATGTGTTTGTATAAGGGGAACCAT  
TCATATCATGCTCCCCCTTGAATGCAGAACCTTCTTCTTGACTCAAGGGGCCCTTGCTAAATGACAAACATTCCAATGGAACCATTAAAGACAGGAGCCCATATCGA  
GCTCTTCCGATCTGTCCCTATTGGTGAAGTTCCTCTCCATACAACACTCAAGATTTGAGTCAGTCGCTTGGTCAGCAAGTGCTTGTATGATGGCATCAATTGGCTAAC  
AATTGGAATTTCTGGCCCAGACAATGGGGCAGTGGCTGTGTTAAAGTACAATGGCATAATAACAGACACTATCAAGAGTTGGAGAAACAATATATTGAGAACAACAAG  
AGTCTGAATGTGCATGTGTAATGGTTCTTGCTTTACCATAATGACCGATGGACCAAGTGTGACAGGGCCTCATACAAGATCTTCAGAATAGAAAAGGGAAAGATA  
GTCAAATCAGTCGAAATGAATGCCCTAATTACTATGAGGAATGCTCCTGTTATCCTGATTCTAGTGAATCACATGTGTGTGCAGGGATAACTGGCATGGCTC  
GAATCGACCGTGGGTGTCTTTCAACCAGAATCTGGAATATCAGATAGGATACATATGCAGTGGGGTTTTCGGAGACAATCCACGCCCTAATGATAAGACAGGCAGTT  
GTGGTCCAGTATCGTCTAATGGAGCAAATGGAGTAAAAGGATTTTCATTCAAATACGGCAATGGTGTGGATAGGGGAGAACTAAAAGCATTAGTTCAAGAAAAGGT  
TTTGAGATGATTT--  
GCTCCATTAGGATGGACTGGGACAGACAATAACTTCTCAATAAAGCAAGATATCGTAGGAATAAAGAGTGGTCAGGATATAGCGGGAGTTTTGTTGAGCATCCAGA  
ACTAACAGGGCTGGATTGTATAAGACCTTGCTTCTGGGTTGAACTAATCAGAGGGCGACCCGAAGAGAACACAATCTGGACTAGCGGGAGCAGCATATCCTTTTGT  
GGTGTAAACAGTGACACTGTGGGTTGGTCT

>HAP19\_0.00838848 | global\_haplotype frequency=0.008388

CTGTATGACAATTGGAATGGCTAACTTAATATTACAAATTGGAAACATAATCTCAATATGGGTTAGCCACTCAATTCAACTTGGGAATCAAAGTCATATTGAAACATGC  
AATCAAAGCGTCATTACTTATGAAAACAACACTTGGGTAAATCAGACATATGTTAACATCAGCAACACCAACTTTGCTGCTGGACAGTCAGTGGTTCCCGTGAAATTA  
GCGGGCAATTCCTCTCTCGACCCTGTTAGTGGATGGGCTATATACAGTAAAGACAACAGTGTAAAGAATCGGTTCCAAGGGGGATGTGTTTGTATAAGGGGAACCAT  
TCATATCATGAGACCCCTTGAATGCAGAACCTTCTTCTTGACTCAAGGGGCCCTTGCTAAATGACAAACATTCCAATGGAACCATTAAAGACAGGAGCCCATATCGA  
ACCCTAATGAGCTGTCCCTATTGGTGAAGTTCCTCTCCATACAACACTCAAGATTTGAGTCAGTCGCTTGGTCAGCAAGTGCTTGTATGATGGCATCAATTGGCTAAC  
AATTGGAATTTCTGGCCCAGACAATGGGGCAGTGGCTGTGTTAAAGTACAATGGCATAATAACAGACACTATCAAGAGTTGGAGAAACAATATATTGAGAACAACAAG  
AGTCTGAATGTGCATGTGTAATGGTTCTTGCTTTACCATAATGACCGATGGACCAAGTGTGACAGGGCCTCATACAAGATCTTCAGAATAGAAAAGGGAAAGATA  
GTCAAATCAGTCGAAATGAATGCCCTAATTACTATGAGGAATGCTCCTGTTATCCTGATTCTAGTGAATCACATGTGTGTGCAGGGATAACTGGCATGGCTC  
GAATCGACCGTGGGTGTCTTTCAACCAGAATCTGGAATATCAGATAGGATACATATGCAGTGGGGTTTTCGGAGACAATCCACGCCCTAATGATAAGACAGGCAGTT  
GTGGTCCAGTATCGTCTAATGGAGCAAATGGAGTAAAAGGATTTTCATTCAAATACGGCAATGGTGTGGATAGGGGAGAACTAAAAGCATTAGTTCAAGAAAAGGT  
TTTGAGATGATTTGGGATCCGAATGGATGGACTGGGACAGACAATAACTTCTCAATAAAGCAAGATATCGTAGGAATAAAGAGTGGTCAGGATATAGCGGGAGTTT  
TGTTGAGCATCCAGAACTAACAGGGCTGGATTGTATAAGACCTTGCTTCTGGGTTGAACTAATCAGAGGGCGACCCGAAGAGAACACAATCTGGACTAGCGGGAGC  
AGCATATCCTTTTGTGGTGTAAACAGTGACACTGTGGGTTGGTCT

>HAP20\_0.00802261 | global\_haplotype frequency=0.008023

CTGTATGACAATTGGAATGGCTAACTTAATATTACAAATTGGAAACATAATCTCAATATGGGTTAGCCACTCAATTCAACTTGGGAATCAAAGTCATATTGAAACATGC  
AATCAAAGCGTCATTAATTATGAAAACAACACTTGGGTAAATCAGACATATGTTAACATCAGCAACACCAACTTTGCTGCTGGACAGTCAGTGGTTCCCGTGAAATTA  
GCGGGCAATTCCTCTCTCTGCCCTGTTAGTGGATGGGCTATATACAGTAAAGACAACAGTGTAAAGAACCGTTCCAAGGGGGATGTGTTTGTGATAAGGGGAACCAT  
TCATATCATGCTCCCCCTTGAATGCAGAACCTTCTTCTTGACTCAAGGGGCCCTTGCTAAATGACAAACATTCCAATGGAACCATTAAAGACAGGAGCCCATATCGA  
ACCCTAATGAGCTGTCCTATTGGTGAAGTTCCTCTCCATACAACACTCAAGATTTGAGTCAGTCGCTTGGTCAGCAAGTGCTTGTGATGATGGCATCAATTGGCTAAC  
AATTGGAATTTCTGGCCCAGACAATGGGGCAGTGGCTGTGTTAAAGTACAATGGCATAATAACAGACACTATCAAGAGTTGGAGAAACAATATATTGAGAACACAAG  
AGTCTGAATGTGCATGTGTAATGGTTCTTGCTTTACCATAATGACCGATGGACCAAGTGTGACAGGGCCTCATACAAGATCTTCAGAATAGAAAAGGGAAAGATA  
GTCAAATCAGTCGAAATGAATGCCCTAATTACTATGAGGAATGCTCCTGTTATCCTGATTCTAGTGAATCACATGTGTGTGCAGGGATAACTGGCATGGCTC  
GAATCGACCGTGGGTGTCTTTCAACCAGAATCTGGAATATCAGATAGGATACATATGCAGTGGGGTTTTCGGAGAGATCGGACGCCCTAATGATAAGACAGGCAGT  
TGTGGTCCAGTATCGTCTAATGGAGCAAATGGAGTAAAGGATTTTCATTCAAATACGGCAATGGTGTGGATAGGGGAGAACTAAAAGCATTAGTTCAAGAAAAGG  
TTTTGAGATGATTTGGGATCCGAATGGATGGACTGGGACAGACAATAACTTCTCAATAAAGCAAGATATCGTAGGAATAAAGAGTGGTCAGGATATAGCGGGAGTT  
TTGTTACAGCATCCAGAACTAACAGGGCTGGATTGTATAAGACCTTGCTTCTGGGTTGAACTAATCAGAGGGCGACCCGAAGAGAACAACAATCTGGACTAGCGGGAG  
CAGCATATCCTTTTGTGGTGTAAACAGTGACACTGTGGGTTGGTCT

>HAP21\_0.00769805 | global\_haplotype frequency=0.007698

CTGTATGACAATTGGAATGGCTAACTTAATATTACAAATTGGAAACATAATCTCAATATGGGTTAGCCACTCAATTCAACTTGGGAATCAAAGTCATATTGAAACATGC  
AATCAAAGCGTCATTAATTATGAAAACAACACTTGGGTAAATCAGACATATGTTAACATCAGCAACACCAACTTTGCTGCTGGACAGTCAGTGGTTCCCGTGAAATTA  
GCGGGCAATTCCTCTCTCTGCCCTGTTAGTGGATGGGCTATATACAGTAAAGACAACAGTGTAAAGAACCGTTCCAAGGGGGATGTGTTTGTGATAAGGGGAACCAT  
TCATATCATGCTCCCCCTTGAATGCAGAACCTTCTTCTTGACTCAAGGGGCCCTTGCTAAATGACAAACATCGGAAGGAACCATTAAAGACAGGAGCCCATATCGA  
ACCCTAATGAGCTGTCCTATTGGTGAAGTTCCTCTCCATACAACACTCAAGATTTGAGTCAGTCGCTTGGTCAGCAAGTGCTTGTGATGATGGCATCAATTGGCTAAC  
AATTGGAATTTCTGGCCCAGACAATGGGGCAGTGGCTGTGTTAAAGTACAATGGCATAATAACAGACACTATCAAGAGTTGGAGAAACAATATATTGAGAACACAAG  
AGTCTGAATGTGCATGTGTAATGGTTCTTGCTTTACCATAATGACCGATGGACCAAGTGTGACAGGGCCTCATACAAGATCTTCAGAATAGAAAAGGGAAAGATA  
GTCAAATCAGTCGAAATGAATGCCCTAATTACTATGAGGAATGCTCCTGTTATCCTGATTCTAGTGAATCACATGTGTGTGCAGGGATAACTGGCATGGCTC  
GAATCGACCGTGGGTGTCTTTCAACCAGAATCTGGAATATCAGATAGGATACATATGCAGTGGGGTTTTCGGAGACAATCCACGCCCTAATGATAAGACAGGCAGTT  
GTGGTCCAGTATCGTCTAATGGAGCAAATGGAGTAAAGGATTTTCATTCAAATACGGCAATGGTGTGGATAGGGGAGAACTAAAAGCATTAGTTCAAGAAAAGGT  
TTTGAGATGATTTGGGATCCGAATGGATGGACTGGGACAGACAATAACTTCTCAATAAAGCAAGATATCGTAGGAATAAAGAGTGGTCAGGATATAGCGGGAGTTT  
TGTTACAGCATCCAGAACTAACAGGGCTGGATTGTATAAGACCTTGCTTCTGGGTTGAACTAATCAGAGGGCGACCCGAAGAGAACAACAATCTGGACTAGCGGGAGC  
AGCATATCCTTTTGTGGTGTAAACAGTGACACTGTGGGTTGGTCT

>HAP22\_0.00731366 | global\_haplotype frequency=0.007314

CTGTATGACAATTGGAATGGCTAACTTAATATTACAAATTGGAAACATAATCTCAATATGGGTTAGCCACTCAATTCAACTTGGGAATCAAAGTCATATTGAAACATGC  
AATCAAAGCGTCATTAATTATGAAAACAACACTTGGGTAAATCAGACATATGTTAACATCAGCAACACCAACTTTGCTGCTGGACAGTCAGTGGTTCCCGTGAAATTA  
GCGGGCAATTCCTCTCTCTGCCCTGTTAGTGGATGGGCTATATACAGTAAAGACAACAGTGTAAAGAATCGGTTCCAAGGGGGATGTGTTTGTGATAAGGGGAACCAT  
TCATATCATGCTCCCCCTTGAATGCAGAACCTTCTTCTTGACTCAAGGGGCCCTTGCTAAATGACAAACATTCCAATGGAACCATTAAAGACAGGAGCCCATATCGA  
ACCCTAATGAGCTGTCCTATTGGTGAAGTTCCTCTCCATACAACACTCAAGATTTGAGTCAGTCGCTTGGTCAGCAAGTGCTTGTGATGATGGCATCAATTGGCTAAC  
AATTGGAATTTCTGGCCCAGACAATGGGGCAGTGGCTGTGTTAAAGTACAATGGCATAATAACAGACACTATCAAGAGTTGGAGAAACAATATATTGAGAACACAAG  
AGTCTGAATGTGCATGTGTAATGGTTCTTGCTTTACCATAATGACCGATGGACCAAGTGTGACAGGGCCTCATACAAGATCTTCAGAATAGAAAAGGGAAAGATA  
GTCAAATCAGTCGAAATGAATGCCCTAATTACTATGAGGAATGCTCCTGTTATCCTGATTCTAGTGAAATCACATGTGTGTGCAGGGATAACTGGCATGGCTC  
GAATCGACCGTGGGTGTCTTTCAACCAGAATCTGGAATATCAGATAGGATACATATGCAGTGGGGAGATCGGAAGCAATCCACGCCCTAATGATAAGACAGGCAGT  
TGTGGTCCAGTATCGTCTAATGGAGCAAATGGAGTAAAGGATTTTCATTCAAATACGGCAATGGTGTGGATAGGGGAGAACTAAAAGCATTAGTTCAAGAAAAGG  
TTTTGAGATGATTTGGGATCCGAATGGATGGACTGGGACAGACAATAACTTCTCAATAAAGCAAGATATCGTAGGAATAAAGAGTGGTCAGGATATAGCGGGAGTT  
TTGTTACAGCATCCAGAACTAACAGGGCTGGATTGTATAAGACCTTGCTTCTGGGTTGAACTAATCAGAGGGCGACCCGAAGAGAACAACAATCTGGACTAGCGGGAG  
CAGCATATCCTTTTGTGGTGTAAACAGTGACACTGTGGGTTGGTCT

>HAP23\_0.00715532 | global\_haplotype frequency=0.007155

CTGTATGACAATTGGAATGGCTAACTTAATATTACAAATTGGAAACATAATCTCAATATGGGTTAGCCACTCAATTCAACTTGGGAATCAAAGTCATATTGAAACATGC  
AATCAAAGCGTCATTAATTATGAAAACAACACTTGGGTAAATCAGACATATGTTAACATCAGCAACACCAACTTTGCTGCTGGACAGTCAGTGGTTCCCGTGAAATTA  
GCGGGCAATTCCTCTCTCTGCCCTGTTAGTGGATGGGCTATATACAGTAAAGACAACAGTGTAAAGAATCGGTTCCAAGGGGGATGTGTTTGTGCGGAAGAGCACACG  
TCATATCATGCTCCCCCTTGAATGCAGAACCTTCTTCTTGACTCAAGGGGCCCTTGCTAAATGACAAACATTCCAATGGAACCATTAAAGACAGGAGCCCATATCGA  
ACCCTAATGAGCTGTCCTATTGGTGAAGTTCCTCTCCATACAACACTCAAGATTTGAGTCAGTCGCTTGGTCAGCAAGTGCTTGTGATGATGGCATCAATTGGCTAAC  
AATTGGAATTTCTGGCCCAGACAATGGGGCAGTGGCTGTGTTAAAGTACAATGGCATAATAACAGACACTATCAAGAGTTGGAGAAACAATATATTGAGAACACAAG  
AGTCTGAATGTGCATGTGTAATGGTTCTTGCTTTACCATAATGACCGATGGACCAAGTGTGACAGGGCCTCATACAAGATCTTCAGAATAGAAAAGGGAAAGATA  
GTCAAATCAGTCGAAATGAATGCCCTAATTACTATGAGGAATGCTCCTGTTATCCTGATTCTAGTGAAATCACATGTGTGTGCAGGGATAACTGGCATGGCTC  
GAATCGACCGTGGGTGTCTTTCAACCAGAATCTGGAATATCAGATAGGATACATATGCAGTGGGGTTTTTCGGAGACAATCCACGCCCTAATGATAAGACAGGCAGTT  
GTGGTCCAGTATCGTCTAATGGAGCAAATGGAGTAAAGGATTTTCATTCAAATACGGCAATGGTGTGGATAGGGGAGAACTAAAAGCATTAGTTCAAGAAAAGGT  
TTTGAGATGATTTGGGATCCGAATGGATGGACTGGGACAGACAATAACTTCTCAATAAAGCAAGATATCGTAGGAATAAAGAGTGGTCAGGATATAGCGGGAGTTT  
TGTTACAGCATCCAGAACTAACAGGGCTGGATTGTATAAGACCTTGCTTCTGGGTTGAACTAATCAGAGGGCGACCCGAAGAGAACAACAATCTGGACTAGCGGGAGC  
AGCATATCCTTTTGTGGTGTAAACAGTGACACTGTGGGTTGGTCT

>HAP24\_0.00707165 | global\_haplotype frequency=0.007072

CTGTATGACAATTGGAATGGCTAACTTAATATTACAAATTGGAAACATAATCTCAATATGGGTTAGCCACTCAATTCAACTTGGGAATCAAAGTCATATTGAAACATGC  
AATCAAAGCGTCATTACTTATGAAAACAACACTTGGGTAAATCAGACATATGTTAACATCAGCAACACCAACTTTGCTGCTGGACAGTCAGTGGTTCCCGTGAAATTA  
GCGGGCAATTCCTCTCTCTGCCCTGTTAGTGGATGGGCTATATACAGTAAAGACAACAGTGTAAAGAATCGGTTCCAAGGGGGATGTGTTTGTGATAAGGGAACCAT  
TCATATCATGCTCCCCCTTGAATGCAGAACCTTCTTCTTGACTCAAGGGGCCTTGCTAAATGACAAACATTCCAATGGAACCATTAAAGACAGGAGCCCATATCGA  
ACCCTAATGAGCTGTCTTATTGGTGAAGTTCCTCTCCATACAACTCAAGATTTGAGTCAGTCGCTTGGTCAGCAAGTGCTTGTGATGATGGCATCAATTGGCTAAC  
AATTGGAATTTCTGGCCCAGACAATGGGGCAGTGGCTGTGTTAAAGTACAATGGCATAATAACAGACACTATCAAGAGTTGGAGAAACAATATATTGAGAACAACAAG  
AGTCTGAATGTGCATGTGTAATGGTTCTTGCTTTACCATAATGACCGATGGACCAAGTGATGGACAGGCCTCATAACAAGATCTTCAGAATAGAAAAGGGAAAGATA  
GTCAAATCAGTCGAAATGAATGCCCTAATTACTATGAGGAATGCTCCTGTTATCCTGATTCTAGTGAAATCACATGTGTGTGCAGGGATAACTGGCATGGCTC  
GAATCGACCGTGGGTGTCTTTCAACCAGAATCTGGAATATCAGATAGGATACATATGCAGTGAGA---  
TCGGAGAGCATCCACGCCCTAATGATAAGACAGGCAGTTGTGGTCCAGTATCGTCTAATGGAGCAAATGGAGTAAAAGGATTTTCATTCAAATACGGCAATGGTGTT  
TGGATAGGGAGAACTAAAAGCATTAGTTCAAGAAAAGGTTTTGAGATGATTTGGGATCCGAATGGATGGACTGGGACAGACAATAACTTCTCAATAAAGCAAGATAT  
CGTAGGAATAAAAGAGTGGTCAGGATATAGCGGGAGTTTTGTTTCAGCATCCAGAATAACAGGGCTGGATTGTATAAGACCTTGCTTCTGGGTTGAACTAATCAGAG  
GGCGACCCGAAGAGAACACAATCTGGACTAGCGGGAGCAGCATATCCTTTTGTGGTGTAAACAGTGACACTGTGGGTTGGTCT

>HAP25\_0.00663741 | global\_haplotype frequency=0.006637

CTGTATGACAATTGGAATGGCTAACTTAATATTACAAATTGGAAACATAATCTCAATATGGGTTAGCCACTCAATTCAACTTGGGAATCAAAGTCATATTGAAACATGC  
AATCAAAGCGTCATTACTTATGAAAACAACACTTGGGTAAATCAGACATATGTTAACATCAGCAACACCAACTTTGCTGCTGGACAGTCAGTGGTTTCCCGTGAAATTA  
GCGGGCAATTCCTCTCTCTGCCCTGTTAGTGGATGGGCTATATACAGTAAAGACAACAGTGTAAAGAATCGGATCGGAAGAGCACACGTTTGTGATAAGGGAACCAT  
TCATATCATGCTCCCCCTTGAATGCAGAACCTTCTTCTTGACTCAAGGGGCCTTGCTAAATGACAAACATTCCAATGGAACCATTAAAGACAGGAGCCCATATCGA  
ACCCTAATGAGCTGTCTTATTGGTGAAGTTCCTCTCCATACAACTCAAGATTTGAGTCAGTCGCTTGGTCAGCAAGTGCTTGTGATGATGGCATCAATTGGCTAAC  
AATTGGAATTTCTGGCCCAGACAATGGGGCAGTGGCTGTGTTAAAGTACAATGGCATAATAACAGACACTATCAAGAGTTGGAGAAACAATATATTGAGAACAACAAG  
AGTCTGAATGTGCATGTGTAATGGTTCTTGCTTTACCATAATGACCGATGGACCAAGTGATGGACAGGCCTCATAACAAGATCTTCAGAATAGAAAAGGGAAAGATA  
GTCAAATCAGTCGAAATGAATGCCCTAATTACTATGAGGAATGCTCCTGTTATCCTGATTCTAGTGAAATCACATGTGTGTGCAGGGATAACTGGCATGGCTC  
GAATCGACCGTGGGTGTCTTTCAACCAGAATCTGGAATATCAGATAGGATACATATGCAGTGGGGTTTTTCGGAGACAATCCACGCCCTAATGATAAGACAGGCAGTT  
GTGGTCCAGTATCGTCTAATGGAGCAAATGGAGTAAAAGGATTTTCATTCAAATACGGCAATGGTGTTTGGATAGGGAGAACTAAAAGCATTAGTTCAAGAAAAGGT  
TTTGAGATGATTTGGGATCCGAATGGATGGACTGGGACAGACAATAACTTCTCAATAAAGCAAGATATCGTAGGAATAAAAGAGTGGTCAGGATATAGCGGGAGTTT  
TGTTTCAGCATCCAGAATAACAGGGCTGGATTGTATAAGACCTTGCTTCTGGGTTGAACTAATCAGAGGGCGACCCGAAGAGAACACAATCTGGACTAGCGGGAGC  
AGCATATCCTTTTGTGGTGTAAACAGTGACACTGTGGGTTGGTCT

>HAP26\_0.00640489 | global\_haplotype frequency=0.006405

CTGTATGACAATTGGAATGGCTAACTTAATATTACAAATTGGAAACATAATCTCAATATGGGTTAGCCACTCAATTCAACTTGGGAATCAAAGTCATATTGAAACATGC  
AATCAAAGCGTCATTACTTATGAAAACAACACTTGGGTAAATCAGACATATGTTAACATCAGCAACACCAACTTTGCTGCTGGACAGTCAGTGGTTCCCGTGAAATTA  
GCGGGCAATTCCTCTCTCTGCCCTGTTAGTGGATGGGCTATATACAGTAAAGACAACAGTGTAAAGAATCGGTTCCAAGGGGGATGTGTTTGTGATAAGGGGAACCAT  
TCATATCATGCTCCCCCTTGAATGCAGAACCTTCTTCTTGACTCAAGGGGCCTTGCTAAATGACAAACATTCCAATGGAACCATTAAAGACAGGAGCCCATATCGA  
ACCCTAATGAGCTGTCCTATTGGTGAAGTCCCCTCTCCATACAACTCAAGATTTGAGTCAGTCGCTTGGTCAGCAAGTGCTTGTGATGATGGCATCAATTGGCTAAC  
AATTGGAATATCGGGAGCACACAATGGGGCAGTGGCTGTGTTAAAGTACAATGGCATAATAACAGACACTATCAAGAGTTGGAGAAACAATATATTGAGAACAACAAG  
AGTCTGAATGTGCATGTGTAATGGTTCTTGCTTTACCATAATGACCGATGGACCAAGTGATGGACAGGCCTCATACAAGATCTTCAGAATAGAAAAGGGAAAGATA  
GTCAAATCAGTCGAAATGAATGCCCTAATTACTATGAGGAATGCTCCTGTTATCCTGATTCTAGTGAAATCACATGTGTGTGCAGGGATAACTGGCATGGCTC  
GAATCGACCGTGGGTGTCTTTCAACCAGAATCTGGAATATCAGATAGGATACATATGCAGTGGGGTTTTTCGGAGACAATCCACGCCCTAATGATAAGACAGGCAGTT  
GTGGTCCAGTATCGTCTAATGGAGCAAATGGAGTAAAAGGATTTTCATTCAAATACGGCAATGGTGTGGATAGGGGAGAACTAAAAGCATTAGTTCAAGAAAAGGT  
TTTGAGATGATTTGGGATCCGAATGGATGGACTGGGACAGACAATAAATTCTCAATAAAGCAAGATATCGTAGGAATAAAGAGTGGTCAGGATATAGCGGGAGTTT  
TGTTTCAGCATCCAGAATAACAGGGCTGGATTGTATAAGACCTTGCTTCTGGGTTGAACTAATCAGAGGGCGACCCGAAGAGAACACAATCTGGACTAGCGGGAGC  
AGCATATCCTTTTGTGGTGTAAACAGTGACACTGTGGGTTGGTCT

>HAP27\_0.00530943 | global\_haplotype frequency=0.005309

CTGTATGACAATTGGAATGGCTAACTTAATATTACAAATTGGAAACATAATCTCAATATGGGTTAGCCACTCAATTCAACTTGGGAATCAAAGTCATATTGAAACATGC  
AATCAAAGCGTCATTACTTATGAAAACAACACTTGGGTAAATCAGACATATGTTAACATCAGCAACACCAACTTTGCTGCTGGACAGTCAGTGGTTCCCGTGAAATTA  
GCGGGCAATTCCTCTCTCTGCCCTGTTAGTGGATGGGCTATATACAGTAAAGACAACAGTGTAAAGAATCGGTTCCAAGGGAGATCGGTTTGTGATAAGGGGAACCAT  
TCATATCATGCTCCCCCTTGAATGCAGAACCTTCTTCTTGACTCAAGGGGCCTTGCTAAATGACAAACATTCCAATGGAACCATTAAAGACAGGAGCCCATATCGA  
ACCCTAATGAGCTGTCCTATTGGTGAAGTCCCCTCTCCATACAACTCAAGATTTGAGTCAGTCGCTTGGTCAGCAAGTGCTTGTGATGATGGCATCAATTGGCTAAC  
AATTGGAATTTCTGGCCCAGACAATGGGGCAGTGGCTGTGTTAAAGTACAATGGCATAATAACAGACACTATCAAGAGTTGGAGAAACAATATATTGAGAACAACAAG  
AGTCTGAATGTGCATGTGTAATGGTTCTTGCTTTACCATAATGACCGATGGACCAAGTGATGGACAGGCCTCATACAAGATCTTCAGAATAGAAAAGGGAAAGATA  
GTCAAATCAGTCGAAATGAATGCCCTAATTACTATGAGGAATGCTCCTGTTATCCTGATTCTAGTGAAATCACATGTGTGTGCAGGGATAACTGGCATGGCTC  
GAATCGACCGTGGGTGTCTTTCAACCAGAATCTGGAATATCAGATAGGATACATATGCAGTGGGGTTTTTCGGAGACAATCCACGCCCTAATGATAAGACAGGCAGTT  
GTGGTCCAGTATCGTCTAATGGAGCAAATGGAGTAAAAGGATTTTCATTCAAATACGGCAATGGTGTGGATAGGGGAGAACTAAAAGCATTAGTTCAAGAAAAGGT  
TTTGAGATGATTTGGGATCCGAATGGATGGACTGGGACAGACAATAAATTCTCAATAAAGCAAGATATCGTAGGAATAAAGAGTGGTCAGGATATAGCGGGAGTTT  
TGTTTCAGCATCCAGAATAACAGGGCTGGATTGTATAAGACCTTGCTTCTGGGTTGAACTAATCAGAGGGCGACCCGAAGAGAACACAATCTGGACTAGCGGGAGC  
AGCATATCCTTTTGTGGTGTAAACAGTGACACTGTGGGTTGGTCT

>HAP28\_0.00481834 | global\_haplotype frequency=0.004818

CTGTATGACAATTGGAATGGCTAACTTAATATTACAAATTGGAAACATAATCTCAATATGGGTTAGCCACTCAATTCAACTTGGGAATCAAAGTCATATTGAAACATGC  
AATCAAAGCGTCATTACTTATGAACACGACGCTTTCCGATCTCAGACATATGTTAACATCAGCAACACCAACTTTGCTGCTGGACAGTCAGTGGTTCCCGTGAAATTA  
GCGGGCAATTCCTCTCTCTGCCCTGTTAGTGGATGGGCTATATACAGTAAAGACAACAGTGTAAAGAACCGTTCCAAGGGGGATGTGTTTGTATAAGGGGAACCAT  
TCATATCATGCTCCCCCTTGAATGCAGAACCTTCTTCTTGACTCAAGGGGCCCTTGCTAAATGACAAACATTCCAATGGAACCATTAAGACAGGAGCCCATATCGA  
ACCCTAATGAGCTGTCCGATCG--  
GAAGTTCCCTCTCCATACAACACTCAAGATTTGAGTCAGTCGCTTGGTCAGCAAGTGCTTGTGCATGATGGCATCAATTGGCTAACAATTGGAATTTCTGGCCCAGACAA  
TGGGGCAGTGGCTGTGTTAAAGTACAATGGCATAATAACAGACACTATCAAGAGTTGGAGAAACAATATATTGAGAACAAGAGTCTGAATGTGCATGTGTAATG  
GTTCTTGCTTTACCATAATGACCGATGGACCAAGTGTGACAGGCCTCATACAAGATCTTCAGAATAGAAAAGGGAAAGATAGTCAAATCAGTCGAAATGAATGCC  
CCTAATTACTATGAGGAATGCTCCTGTTATCCTGATTCTAGTGAAATCACATGTGTGTGCAGGGATAACTGGCATGGCTCGAATCGACCGTGGGTGTCTTTCAA  
CCAGAATCTGGAATATCAGATAGGATACATATGCAGTGGGGTTTTCGGAGACAATCCACGCCCTAATGATAAGACAGGCAGTTGAGAT-  
CGGAATCGTCTAATGGAGCAAATGGAGTAAAAGGATTTTCAATCAATAACGGCAATGGTGTGGATAGGGAGAATAAAAAGCATTAGTTCAAGAAAAGGTTTTGAG  
ATGATTTGGGATCCGAATGGATGGACTGGGACAGACAATAACTTCTCAATAAAGCAAGATATCGTAGGAATAAAAAGAGTGGTCAGGATATAGCGGGAGTTTTGTTCA  
GCATCCAGAACTAACAGGGCTGGATTGTATAAGACCTTGCTTCTGGGTTGAACTAATCAGAGGGCGACCCGAAGAGAACAACAATCTGGACTAGCGGGAGCAGCATA  
TCCTTTTGTGGTGTAACAGTGACACTGTGGGTTGGTCT

>HAP29\_0.00416077 | global\_haplotype frequency=0.004161

CTGTATGACAATTGGAATGGCTAACTTAATATTACAAATTGGAAACATAATCTCAATATGGGTTAGCCACTCAATTCAACTTGGGAATCAAAGTCATATTGAAACATGC  
AATCAAAGCGTCATTACTTATGAAAACAACACTTGGGTAAATCAGACATATGTTAACATCAGCAACACCAACTTTGCTGCTGGACAGTCAGTGGTTCCCGTGAAATTA  
GCGGGCAATTCCTCTCTCTGCCCTGTTAGTGGATGGGCTATATACAGTAAAGACAACAGTGTAAAGAACCGTTCCAAGGGGGATGTGTTTGTATAAGGGGAACCAT  
TCATATCATGCTCCCCCTTGAAGGCAGAACCTTCTTCTTGACTCAAGGGGCCCTTGCTAAATGACAAACATTCCAATGGAACCATTAAGACAGGAGCCCATATCGA  
ACCCTAATGAGCTGAGCGGAAGATGAAGTTCCCTCTCCATACAACACTCAAGATTTGAGTCAGTCGCTTGGTCAGCAAGTGCTTGTGCATGATGGCATCAATTGGCTAAC  
AATTGGAATTTCTGGCCCAGACAATGGGGCAGTGGCTGTGTTAAAGTACAATGGCATAATAACAGACACTATCAAGAGTTGGAGAAACAATATATTGAGAACAAG  
AGTCTGAATGTGCATGTGTAATGGTTCTTGCTTTACCATAATGACCGATGGACCAAGTGTGACAGGCCTCATACAAGATCTTCAGAATAGAAAAGGGAAAGATA  
GTCAAATCAGTCGAAATGAATGCCCTAATTACTATGAGGAATGCTCCTGTTATCCTGATTCTAGTGAAATCACATGTGTGTGCAGGGATAACTGGCATGGCTC  
GAATCGACCGTGGGTGTCTTTCAACCAGAATCTGGAATATCAGATAGGATACATATGCAGTGGGGTTTTCGGAGACAATCCACGCCCTAATGATAAGACAGGCAGTT  
GTGGTCCAGTATCGTCTAATGGAGCAAATGGAGTAAAAGGATTTTCAATCAATAACGGCAATGGTGTGGATAGGGAGAATAAAAAGCATTAGTTCAAGAAAAGGT  
TTTGAGATGATTTGGGATCCGAATGGATGGACTGGGACAGACAATAACTTCTCAATAAAGCAAGATATCGTAGGAATAAAAAGAGTGGTCAGGATATAGCGGGAGTTT  
TGTTTCAGCATCCAGAACTAACAGGGCTGGATTGTATAAGACCTTGCTTCTGGGTTGAACTAATCAGAGGGCGACCCGAAGAGAACAACAATCTGGACTAGCGGGAGC  
AGCATATCCTTTTGTGGTGTAACAGTGACACTGTGGGTTGGTCT



>HAP30\_0.00395365 | global\_haplotype frequency=0.003954

CTGTATGACAATTGGAATGGCTAACTTAATATTACAAATTGGAAACATAATCTCAATATGGGTTAGCCACTCAATTCAACTTGGGAATCAAAGTCATATTGAAACATGC  
AATCAAAGCGTCATTACTTATGAAAACAACACTTGGGTAAATCAGACATATGTTAACATCAGCAACACCAACTTTGCTGCTGGACAGTCAGTGGTTCCCGTGAAATTA  
GCGGGCAATTCCTCTCTCTGCCCTGTTAGTGGATGGGCTATATACAGTAAAGACAACAGTGTAAAGAATCGGTTCCAAGGAGATCGTGTGTTGTCATAAGGGAACCATT  
CATATCATGCTCCCCCTTGAATGCAGAACCTTCTTCTTGA CTCAAGGGGCCTTGCTAAATGACAAACATTCCAATGGAACCATTAAAGACAGGAGCCCATATCGAA  
CCCTAATGAGCTGTCCTATTGGTGAAGTTCCTCTCCATACAACCTCAAGATTTGAGTCAGTCGCTTGGTCAGCAAGTGCTTGTGTCATGATGGCATCAATTGGCTAACA  
ATTGGAATTTCTGGCCCAGACAATGGGGCAGTGGCTGTGTTAAAGTACAATGGCATAATAACAGACACTATCAAGAGTTGGAGAAACAATATATTGAGAACAACAAGA  
GTCTGAATGTGCATGTGTAATGGTTCTTGCTTTACCATAATGACCGATGGACCAAGTGATGGACAGGCCTCATACAAGATCTTCAGAATAGAAAAGGGAAAGATAG  
TCAAATCAGTCGAAATGAATGCCCTAATTACTATGAGGAATGCTCCTGTTATCCTGATTCTAGTGAATCACATGTGTGTGCAGGGATAACTGGCATGGCTCGA  
ATCGACCGTGGGTGTCTTTCAACCAGAATCTGGAATATCAGATAGGATACATATGCAGTGGGGTTTTTCGGAGACAATCCACGCCCTAATGATAAGACAGGCAGTTGT  
GGTCCAGTATCGTCTAATGGAGCAAATGGAGTAAAAGGATTTTCATTCAAATACGGCAATGGTGTGTTGGATAGGGGAGAACTAAAAGCATTAGTTCAAGAAAAGGTTTT  
GAGATGATTTGGGATCCGAATGGATGGACTGGGACAGACAATAACTTCTCAATAAAGCAAGATATCGTAGGAATAAAGAGTGGTCAGGATATAGCGGGAGTTTTGT  
TCAGCATCCAGAACTAACAGGGCTGGATTGTATAAGACCTTGCTTCTGGGTTGAACTAATCAGAGGGCGACCCGAAGAGAACACAATCTGGACTAGCGGGAGCAGC  
ATATCCTTTTTGTGGTGTAACAGTGACACTGTGGGTTGGTCT

>HAP31\_0.00355494 | global\_haplotype frequency=0.003555

CTGTATGACAATTGGAATGGCTAACTTAATATTACAAATTGGAAACATAATCTCAATATGGGTTAGCCACTCAATTCAACTTGGGAATCAAAGTCATATTGAAACATGC  
AATCAAAGCGTCATTACTTATGAAAACAACACTTGGGTAAATCAGACATATGTTAACATCAGCAACACCAACTTTGCTGCTGGACAGTCAGTGGTTCCCGTGAAATTA  
GCGGGCAATTCCTCTCTCTGCCCTGTTAGTGGATGGGCTATATACAGTAAAGACAACAGTGTAAAGAATCGGTTCCAAGGGGGATGTGTTGTCATAAGGGAACCAT  
TCATATCATGCTCCCCCTTGAATGCAGAACCTTCTTCTTGA CTCAAGGGGCCTTGCTAAATGACAAACATTCCAATGGAACCATTAAAGACAGGAGCCCATATCGA  
ACCCTAATGAGCTGTCCTATTGGTGAAGTTCCTCTCCATACAACCTCAAGATTTGAGTCAGTCGCTTGGTCAGCAAGTGCTTGTGTCATGATGGCATCAATTGGCTAAC  
AATTGGAATTTCTGGCCCAGACAATGGGGCAGTGGCTGTGTTAAAGTACAATGGCATAATAACAGACACTATCAAGAGTTGGAGAAACAATATATTGAGAACAACAAG  
AGTCTGAATGTGCATGTGTAATGGTTCTTGCTTTACCATAATGACCGATGGACCAAGTGATGGACAGGCCTCATACAAGATCTTCAGAATAGAAAAGGGAAAGATA  
GTCAAATCAGTCGAAATGAATGCCCTAATTACTATGAGGAATGCTCCTGTTATCCTGATTCTAGTGAATCACATGTGTGTGCAGGGATAACTGGCATGGCTC  
GAATCGACCGTGGGTGTCTTTCAACCAGAATCTGGAATATCAGATAGGATACATATGCAGTGGGGTTTTTCGGAGACAATCCTCGGCCTAATGATAAGACAGGCAGTT  
GTGGTCCAGTATCGTCTAATGGAGCAAATGGAGTAAAAGGATTTTCATTCAAATACGGCAATGGTGTGTTGGATAGGGGAGAACTAAAAGCATTAGTTCAAGAAAAGGT  
TTTGAGATGATTTGGGATCCGAATGGATGGACTGGGACAGACAATAACTTCTCAATAAAGCAAGATATCGTAGGAATAAAGAGTGGTCAGGATATAGCGGGAGTTT  
TGTTTCAGCATCCAGAACTAACAGGGCTGGATTGTATAAGACCTTGCTTCTGGGTTGAACTAATCAGAGGGCGACCCGAAGAGAACACAATCTGGACTAGCGGGAGC  
AGCATATCCTTTTTGTGGTGTAACAGTGACACTGTGGGTTGGTCT

>HAP32\_0.00346749 | global\_haplotype frequency=0.003467

CTGTATGACAATTGGAATGGCTAACTTAATATTACAAATTGGAAACATAATCTCAATATGGGTTAGCCACTCAATTCAACTTGGGAATCAAAGTCATATTGAAACATGC  
AATCAAAGCGTCATTACTTATGAAAACAACACTTGGGTAAATCAGACATATGTTAACATCAGCAACACCAACTTTGCTGCTGGACAGTCAGTGGTTCCCGTGAAATTA  
GCGGGCAATTCCTCTCTCTGCCCTGTTAGTGGATGGGCTATATACAGTAAAGACAACAGTGTAAAGAATCGGTTCCAAGGGGGATGTGTTTGTGATAAGGGGAACCAT  
TCATATCATGCTCCCCCTTGAATGCAGAACCTTCTTCTTGACTCAAGGGGCCCTTGCTAAATGACAAACATTCCAATGGAACCATTAAAGACAGGAGCCCATATCGA  
ACCCTAATGAGCTGTCCTATTGGTGAAGTTCCTCTCCATACAACCTCAAGATTTGAGTCAGTCGCTTGGTCAGCAAGTGCTTGTGATGATGGCATCAATTGGCTAAC  
AATTGGAATTTCTGGCCCAGACAATGGGGCAGTGGCTGTGTTAAAGTACAATGGCATAATAACAGACACTATCAAGAGTTGGAGAAACAATATATTGAGAACAACAAG  
AGTCTGAATGTGCATGTGTAATGGTTCTTGCTTTACCATAATGACCGATGGACCAAGTGTGATGGACAGGCCTCATACAAGATCTTCAGAATAGAAAAGGGAAAGATA  
GTCAAATCAGTCGAAATGAATGCCCTAATTACTATGAGGAATGCTCCTGTTATCCTGATTCTAGTGAAATCACATGTGTGTGCAGGGATAACGCTCATCTCTCG  
AATCGACCGTGGGTGTCTTTCAACCAGAATCTGGAATATCAGATAGGATACATATGCAGTGGGGTTTTTCGGAGACAATCCACGCCCTAATGATAAAGACAGGCAGTTG  
AGAT-  
CGGAATCGTCTAATGGAGCAAATGGAGTAAAAGGATTTTCATTCAAATACGGCAATGGTGTGGATAGGGGAGAACTAAAAGCATTAGTTCAAGAAAAGGTTTTGAG  
ATGATTTGGGATCCGAATGGATGGACTGGGACAGACAATAACTTCTCAATAAAGCAAGATATCGTAGGAATAAAAGAGTGGTCAGGATATAGCGGGAGTTTTGTTCA  
GCATCCAGAACTAACAGGGCTGGATTGTATAAGACCTTGCTTCTGGGTTGAACTAATCAGAGGGCGACCCGAAGAGAACAATCTGGACTAGCGGGAGCAGCATA  
TCCTTTTGTGGTGTAAACAGTGACACTGTGGGTTGGAGA

>HAP33\_0.00345871 | global\_haplotype frequency=0.003459

CTGTATGACAATTGGAATGGCTAACTTAATATTACAAATTGGAAACATAATCTCAATATGGGTTAGCCACTCAATTCAACTTGGGAATCAAAGTCATATTGAAACATGC  
AATCAAAGCGTCATTACTTATGAAAACAACACTTGGGTAAATCAGACATATGTTAACATCAGCAACACCAACTTTGCTGCTGGACAGTCAGTGGTTCCCGTGAAATTA  
GCGGGCAATTCCTCTCTCTGCCCTGTTAGTGGATGGGCTATATACAGTAAAGACAACAGTGTAAAGAATCGGTTCCAAGGGGGATGTGTTTGTGATAAGGGGAACCAT  
TCATATCATGCTCCCCCTTGAATGCAGAACCTTCTTCTTGACTCAAGGGGCCCTTGCTAAATGACAAACATTCCAATGGAACCATTAAAGACAGGAGCCCATATCGA  
ACCCTAATGAGCTGTCCTATTGGTGAAGTTCCTCTCCATACAACCTCAAGATTTGAGTCAGTCGCTTGGTCAGCAAGTGCTTGTGATGATGGCATCAATTGGCTAAC  
AATTGGAATTTCTGGCCCAGACAATGGGGCAGTGGCTGTGTTAAAGTACAATGGCATAATAACAGACACTATCAAGAGTTGGAGAAACAATATATTGAGAACAACAAG  
AGTCTGAATGTGCATGTGTAATGGTTCTTGCTTTACCATAATGACCGATGGACCAAGTGTGATGGACAGGCCTCATACAAGATCTTCAGAATAGAAAAGGGAAAGATA  
GTCAAATCAGTCGAAATGAATGCCCTAATTACTATGAGGAATGCTCCTGTTATCCTGATTCTAGTGAAATCACATGTGTGTGCAGGGATAACGCTCATCTCTCG  
AATCGACCGTGGGTGTCTTTCAACCAGAATCTGGAATATCAGATAGGATACATATGCAGTGGGGTTTTTCGGAGACAATCCACGCCCTAATGATAAAGACAGGCAGTTG  
TGGTCCAGTATCGTCTAATGGAGCAAATGGAGTAAAAGGATTTTCATTCAAATACGGCAATGGTGTGGATAGGGGAGAACTAAAAGCATTAGTTCAAGAAAAGGTTT  
TGAGATGATTTGGGATCCGAATGGATGGACTGGGACAGACAATAACTTCTCAATAAAGCAAGATATCGTAGGAATAAAAGAGTGGTCAGGATATAGCGGGAGTTTTG  
TTCAGCATCCAGAACTAACAGGGCTGGATTGTATAAGACCTTGCTGATCGGAAGAGCACATCAGAGGGCGACCCGAAGAGAACAATCTGGACTAGCGGGAGCA  
GCATATCCTTTTGTGGTGTAAACAGTGACACTGTGGGTTGGTCT

>HAP34\_0.00293014 | global\_haplotype frequency=0.002930

CTGTATGACAATTGGAATGGCTAACTTAATATTACAAATTGGAAACATAATCTCAATATGGGTTAGCCACTCAATTCAACTTGGGAATCAAAGTCATATTGAAACATGC  
AATCAAAGCGTCATTAATTATGAAAACAACACTTGGGTAAATCAGACATATGTTAACATCAGCAACACCAACTTTGCTGCTGGACAGTCAGTGGTTCCCGTGAAATTA  
GCGGGCAATTCCTCTCTCTGCCCTGTTAGTGGATGGGCTATATACAGTAAAGACAACAGTGTAAAGAACCGTTCCAAGGGGGATGTGTTTGTGATAAGGGGAACCAT  
TCATATCATGCTCCCCCTTGAATGCAGAACCTTCTTCTTGAAGTCAAGGGGCCTTGCTAAATGACAAACATTCCAATGGAACCATTAAAGACAGGAGCCCATATCGA  
ACCCTAATGAGCTGTCCTATTGGTGAAGTCCCTCTCCATACAACACTCAAGATTTGAGTCAGTCGCTTGGTCAGCAAGTGCTTGTGATGATGGCATCAATTGGCTAAC  
AATTGGAATTTCTGGCCAGACAATGGGGCAGTGGCTGTGTTAAAGTACAATGGCATAATAACAGACACTATCAAGAGTTGGAGAAACAATATATTGAGAACACAAG  
AGTCTGAATGTGCATGTGTAATGGTTCTTGCTTTACCATAATGACCGATGGACCAAGTGTGACAGGGCCTCATACAAGATCTTCAGAATAGAAAAGGGAAAGATA  
GTCAAATCAGTCGAAATGAATGCCCTAATTACTATGAGGAATGCTCCTGTTATCCTGATTCTAGTGAATCACATGTGTGTGCAGGGATAACTGGCATGGCTAG-  
ATCGAGCACAGGTGTCTTTCAACCAGAATCTGGAATATCAGATAGGATACATATGCAGTGGGGTTTTTCGGAGACAATCCACGCCCTAATGATAAGACAGGCAGTTGT  
GGTCCAGTATCGTCTAATGGAGCAAATGGAGTAAAAGGATTTTCATTCAAATACGGCAATGGTGTGGATAGGGGAGAACTAAAAGCATTAGTTCAAGAAAAGGTTTT  
GAGATGATTTGGGATCCGAATGGATGGACTGGGACAGACAATAACTTCTCAATAAAGCAAGATATCGTAGGAATAAAGAGTGGTCAGGATATAGCGGGAGTTTTGT  
TCAGCATCCAGAACTAACAGGGCTGGATTGTATAAGACCTTGCTTCTGGGTTGAACTAATCAGAGGGCGACCCGAAGAGAACACAATCTGGACTAGCGGGAGCAGC  
ATATCCTTTTGTGGTGTAAACAGTGACACTGTGGGTTGGTCT

>HAP35\_0.0027595 | global\_haplotype frequency=0.002759

CTGTATGACAATTGGAATGGCTAACTTAATATTACAAATTGGAAACATAATCTCAATATGGGTTAGCCACTCAATTCAACTTGGGAATCAAAGTCATATTGAAACATGC  
AATCAAAGCGTCATTAATTATGAAAACAACACTTGGGTAAATCAGACATATGTTAACATCAGCAACACCAACTTTGCTGCTGGACAGTCAGTGGTTCCCGTGAAATTA  
GCGGGCAATTCCTCTCTCTGCCCTGTTAGTGGATGGGCTATATACAGTAAAGACAACAGTGTAAAGAACCGTTCCAAGGGGGATGTGTTTGTGATAAGGGGAACCAT  
TCATATCATGCTCCCCCTTGAATGCAGAACCTTCTTCTTGAAGTCAAGGGGCCTTGCTAAATGACAAACATTCCAATGGAACCATTAAAGACAGGAGCCCATATCGA  
ACCCTAATGAGCTGTCCTATTGGTGAAGTCCCTCTCCATACAACACTCAAGATTTGAGTCAGTCGCTTGGTCAGCAAGTGCTTGTGATGATGGCATCAATTGGCTAAC  
AATTGGAATAGATGGAAGAGCCACTGGGGCAGTGGCTGTGTTAAAGTACAATGGCATAATAACAGACACTATCAAGAGTTGGAGAAACAATATATTGAGAACACAAG  
AGTCTGAATGTGCATGTGTAATGGTTCTTGCTTTACCATAATGACCGATGGACCAAGTGTGACAGGGCCTCATACAAGATCTTCAGAATAGAAAAGGGAAAGATA  
GTCAAATCAGTCGAAATGAATGCCCTAATTACTATGAGGAATGCTCCTGTTATCCTGATTCTAGTGAATCACATGTGTGTGCAGGGATAACTGGCATGGCTC  
GAATCGACCGTGGGTGTCTTTCAACCAGAATCTGGAATATCAGATAGGATACATATGCAGTGGGGTTTTTCGGAGACAATCCACGCCCTAATGATAAGACAGGCAGTT  
GTGGTCCAGTATCGTCTAATGGAGCAAATGGAGTAAAAGGATTTTCATTCAAATACGGCAATGGTGTGGATAGGGGAGAACTAAAAGCATTAGTTCAAGAAAAGGT  
TTTGAGATGATTTGGGATCCGAATGGATGGACTGGGACAGACAATAACTTCTCAATAAAGCAAGATATCGTAGGAATAAAGAGTGGTCAGGATATAGCGGGAGTTT  
TGTTGAGCATCCAGAACTAACAGGGCTGGATTGTATAAGACCTTGCTTCTGGGTTGAACTAATCAGAGGGCGACCCGAAGAGAACACAATCTGGACTAGCGGGAGC  
AGCATATCCTTTTGTGGTGTAAACAGTGACACTGTGGGTTGGTCT

>HAP36\_0.00272417 | global\_haplotype frequency=0.002724

CTGTATGACAATTGGAATGGCTAACTTAATATTACAAATTGGAAACATAATCTCAATATGGGTTAGCCACTCAATTCAACTTGGGAATCAAAGTCATATTGAAACATGC  
AATCAAAGCGTCATTACTTATGAAAACAACACTTGGGTAAATCAGACATATGTTAACATCAGCAACACCAACTTTGCTGCTGGACAGTCAGTGGTTCCCGTGAAATTA  
GCGGGCAATTCCTCTCTCTGCCCTGTTAGTGGATGGGCTATATACAGTAAAGACAACAGTGTAAAGAATCGGTTCCAAGGGGGATGTGTTTGTGATAAGGGAACCAT  
TCATATCATGCTCCCCCTTGAATGCAGAACCTTCTTCTTGACTCAAGGGGCCTTGCTAAATGACAAACATTCCAATGGAACCATTAAAGACAGGAGCCCATATCGA  
ACCCTAATGAGCTGTCCTATTGGTGAAGTTCCTCTCCATACAACACTCAAGATTTGAGTCAGTCGCTTGGTCAGCAAGTGCTTGTGATGATGGCATCAATTGGCTAAC  
AATTGGAATTTCTGGCCAGACAATGGGGCAGTGGCTGTGTTAAAGTACAATGGCATAATAACAGACACTATCAAGAGTTGGAGAAACAATATATTGAGAACACAAG  
AGTCTGAATGTGCATGTGTAATGGTTCCTTGCTTTACCATAATGACCGATGGACCAAGTGTGACAGGCCTCATACAAGATCTTCAGAATAGAAAAGGGAAAGATA  
GTCAAATCAGTCGAAATGAATGCCCTAATTACTATGAGGAATGCTCCTGTTATCCTGATTCTAGTGAATCACATGTGTGTGCAGGGATAACTGGCATGGCTC  
GAATCGACCGTGGGTGTCTTTCAACCAGAATCTGGAATATCAGATAGGATACATATGCAGTGGGGTTTTCGGAGACAATCCAGATCGGAAGAATAAGACAGGCAGT  
TGTGGTCCAGTATCGTCTAATGGAGCAAATGGAGTAAAGGATTTTCATTCAAATACGGCAATGGTGTGGATAGGGGAGAACTAAAAGCATTAGTTCAAGAAAAGG  
TTTTGAGATGATTTGGGATCCGAATGGATGGACTGGGACAGACAATAACTTCTCAATAAAGCAAGATATCGTAGGAATAAAGAGTGGTCAGGATATAGCGGGAGTT  
TTGTTACAGCATCCAGAACTAACAGGGCTGGATTGTATAAGACCTTGCTTCTGGGTTGAACTAATCAGAGGGCGACCCGAAGAGAACAACAATCTGGACTAGCGGGAG  
CAGCATATCCTTTTGTGGTGTAAACAGTGACACTGTGGGTTGGTCT

>HAP37\_0.00258614 | global\_haplotype frequency=0.002586

CTGTATGACAATTGGAATGGCTAACTTAATATTACAAATTGGAAACATAATCTCAATATGGGTTAGCCACTCAATTCAACTTGGGAATCAAAGTCATATTGAAACATGC  
AATCAAAGCGTCATTACTTATGAAAACAACACTTGGGTAAATCAGACATATGTTAACATCAGCAACACCAACTTTGCTGCTGGACAGTCAGTGGTTCCCGTGAAATTA  
GCGGGCAATTCCTCTCTCTGCCCTGTTAGTGGATGGGCTATATACAGTAAAGACAACAGTATAAGAATCGGTTCCAAGGGGGATGTGTTTGTGATAAGGGAACCAT  
CATATCGGGCTCCCCCTTGAATGCAGAACCTTCTTCTTGACTCAAGGGGCCTTGCTAAATGACAAACATTCCAATGGAACCATTAAAGACAGGAGCCCATATCGAA  
CCCTAATGAGCTGTCCTATTGGTGAAGTTCCTCTCCATACAACACTCAAGATTTGAGTCAGTCGCTTGGTCAGCAAGTGCTTGTGATGATGGCATCAATTGGCTAACA  
ATTGGAATTTCTGGCCAGACAATGGGGCAGTGGCTGTGTTAAAGTACAATGGCATAATAACAGACACTATCAAGAGTTGGAGAAACAATATATTGAGAACACAAGA  
GTCTGAATGTGCATGTGTAATGGTTCCTTGCTTTACCATAATGACCGATGGACCAAGTGTGACAGGCCTCATACAAGATCTTCAGAATAGAAAAGGGAAAGATAG  
TCAAATCAGTCGAAATGAATGCCCTAATTACTATGAGGAATGCTCCTGTTATCCTGATTCTAGTGAATCACATGTGTGTGCAGGGATAACTGGCATGGCTCGA  
ATCGACCGTGGGTGTCTTTCAACCAGAATCTGGAATATCAGATAGGATACATATGCAGTGGGGTTTTCGGAGACAATCCACGCCCTAATGATAAGACAGGCAGTTGT  
GGTCCAGTATCGTCTAATGGAGCAAATGGAGTAAAGGATTTTCATTCAAATACGGCAATGGTGTGGATAGGGGAGAACTAAAAGCATTAGTTCAAGAAAAGGTTTT  
GAGATGATTTGGGATCCGAATGGATGGACTGGGACAGACAATAACTTCTCAATAAAGCAAGATATCGTAGGAATAAAGAGTGGTCAGGATATAGCGGGAGTTTTGT  
TCAGCATCCAGAACTAACAGGGCTGGATTGTATAAGACCTTGCTTCTGGGTTGAACTAATCAGAGGGCGACCCGAAGAGAACAACAATCTGGACTAGCGGGAGCAGC  
ATATCCTTTTGTGGTGTAAACAGTGACACTGTGGGTTGGTCT

>HAP38\_0.00240052 | global\_haplotype frequency=0.002401

CTGTATGACAATTGGAATGGCTAACTTAATATTACAAATTGGAAACATAATCTCAATATGGGTTAGCCACTCAATTCAACTTGGGAATCAAAGTCATATTGAAACATGC  
AATCAAAGCGTCATTACTTATGAAAACAACACTTGGGTAAATCAGACATATGTTAACATCAGCAACACCAACTTTGCTGCTGGACAGTCAGTGGTTCCCGTGAAATTA  
GCGGGCAATTCCTCTCTCTGCCCTGTTAGTGGATGGGCTATATACAGTAAAGACAACAGTGTAAGAATCGGTTCCAAGGGGGATGTGTTTGTATAAGGGAACCAT  
TCATATCATGCTCCCCCTTGAATGCAGAACGCTCTTCC-GA-  
TCTTGGGGCCTTGCTAAATGACAAACATTCCAATGGAACCATTAAAGACAGGAGCCCATATCGAACCCATAATGAGCTGTCCCTATTGGTGAAGTTCCTCTCCATACA  
ACTCAAGATTTGAGTCAGTCGCTTGGTCAGCAAGTGCTTGTGCATGATGGCATCAATTGGCTAACAATTGGAATTTCTGGCCAGACAATGGGGCAGTGAGATCGGA  
AGAGCACACGGGCATAATAACAGACACTATCAAGAGTTGGAGAAACAATATATTGAGAACACAAGAGTCTGAATGTGCATGTGTAATGGTTCTTGCTTTACCATAAT  
GACCGATGGACCAAGTGATGGACAGGCCTCATACAAGATCTTCAGAATAGAAAAGGGAAAGATAGTCAAATCAGTCGAAATGAATGCCCTAATTACTATGAGG  
AATGCTCCTGTTATCCTGATTCTAGTGAATCACATGTGTGTGCAGGGATAACTGGCATGGCTCGAATCGACCGTGGGTGTCTTTCAACCAGAATCTGGAATATCAG  
ATAGGATACATATGCAGTGGGGTTTTTCGGAGACAATCCACGCCCTAATGATAAGACAGGCAGTTGTGGTCCAGTATCGTCTAATGGAGCAAATGGAGTAAAAGGATT  
TTCATTCAAATACGGCAATGGTGTGGATAGGGGAGAACTAAAAGCATTAGTTCAAGAAAAGGTTTTGAGATGATTTGGGATCCGAATGGATGGACTGGGACAGACA  
ATAACTTCTCAATAAAGCAAGATATCGTAGGAATAAAGAGTGGTCAGGATATAGCGGGAGTTTTGTTTCAGCATCCAGAATAACAGGGCTGGATTGTATAAGACCT  
TGCTTCTGGGTTGAACTAATCAGAGGGCGACCCGAAGAGAACACAATCTGGACTAGCGGGAGCAGCATATCCTTTTGTGGTGTAACAGTGACACTGTGGGTTGGT  
CT

>HAP39\_0.00236137 | global\_haplotype frequency=0.002361

CTGTATGACAATTGGAATGGCTAACTTAATATTACAAATTGGAAACATAATCTCAATATGGGTTAGCCACTCAATTCAACTTGGGAATCAAAGTCATATTGAAACATGC  
AATCAAAGCGTCATTACTTATGAAAACAACACTTGGGTAAATCAGACATATGTTAACATCAGCAACACCAACTTTGCTGCTGGACAGTCAGTGGTTCCCGTGAAATTA  
GCGGGCAATTCCTCTCTCTGCCCTGTTAGTGGATGGGCTATATACAGTAAAGACAACAGTGTAAGAATCGGTTCCAAGGGGGATGTGTTTGTATAAGGGAACCAT  
TCATATCATGCTCCCCCTTGAATGCAGAACCTTCTTCTTGACTCAAGGGGCCCTTGCTAAATGACAAACATTCCAATGGAACCATTAAAGACAGGAGCCCATATCGA  
ACCCTAATGAGCTGTCCCTATTGGTGAAGTTCCTCTCCATACAACCTCAAGATTTGAGTCAGTCGCTTGGTCAGCAAGTGCTTGTGCATGATGGCATCAATTGGCTAAC  
AATTGGAATTTCTGGCCAGACAATGGGGCAGTGGCTGTGTTAAAGTACAATGGCATAATAACAGACACTATCAAGAGTTGGAGAAACAATATATTGAGAACACAAG  
AGTCTGAATGTGCATGTGTAATGGTTCTTGCTTTACCATAATGACCGATGGACCAAGTGATGGACAGGCCTCATACAAGATCTTCAGAATAGAAAAGGGAAAGATA  
GTCAAATCAGTCGAAATGAATGCCCTAATTACTATGAGGAATGCTCCTGTTATCCTGATTCTAGTGAATCACATGTGTGTGCAGGGATAACTGGCATGGCTC  
GAATCGACCGTGGGTGTCTTTCAACCAGAATCTGGAATATCAGATAGGATACATATGCAGTGGGGTTTTTCGGAGACAATCCACGCCCTAATGATAAGACAGGCAGTT  
GTGGTCCAGTATCGTCTAATGGAGCAAATGGAGTAAAAGGATTTTTCATTCAAATACGGCAATGGTGTGGATAGGGGAGAACTAAAAGCATTAGTTCAAGAAAAGG  
TTTGAGATGATTTGGGATCCGAATGGATGGACTGGGACAGACAATAACTTCTCAATAAAGCAAGATATCGTAGGAATAAAGAGTGGTCAGGATATAGCGGGAGTTT  
TGTTTCAGCATCCAGAATAACAGGGCTGGATTGTATAAGACCTTGCTTCTGGGTTACGCTCTTCCGATGGCGACCCGAAGAGAACACAATCTGGACTAGCGGGAGC  
AGCATATCCTTTTGTGGTGTAACAGTGACACTGTGGGTTGGTCT

>HAP40\_0.0023025 | global\_haplotype frequency=0.002302

CTGTATGACAATTGGAATGGCTAACTTAATATTACAAATTGGAAACATAATCTCAATATGGGTTAGCCACTCAATTCAACTTGGGAATCAAAGTCATATTGAAACATGC  
AATCAAAGCGTCATTACTTATGAAAACAACACTTGGGTAAATCAGACATATGTTAACATCAGCAACACCAACTTTGCTGCTGGACAGTCAGTGGTTCCCGTGAAATTA  
GCGGGCAATTCCTCTCTCTGCCCTGTTAGTGGATGGGCTATATACAGTAAAGACAACAGTGTAAAGAATCGGTTCCAAGGGGGATGTGTTTGTGATAAGGGGAACCAT  
TCATATCATGCTCCCCCTTGAATGCAGAACCTTCTTCTTGACTCAAGGGGCCTTGCTAAATGACAAACATTCCAATGGAACCATTAAAGACAGGAGCCCATATCGA  
ACCCTAATGAGCTGTCCTATTGGTGAAGTTCCTCTCCATACAACACTCAAGATTTGAGTCAGTCGCTTGGTCAGCAAGTGCTTGTGATGATGGCATCAATTGGCTAAC  
AATTGGAATTTCTGGCCAGACAATGGGGCAGTGGCTGTGTTAAAGTACAATGGCATAATAACAGACACTATCAAGAGTTGGAGAAACAATATATTGAGAACACAAG  
AGTCTGAATGTGCATGTGTAATGGTTCCTTGCTTTACCATAATGACCGATGGACCAAGTGTGACAGGGCCTCATACAAGATCTTCAGAATAGAAAAGGGAAAGATA  
GTCAAATCAGTCGAAATGAATGCCCTAATTACTATGAGGAATGCTCCTGTTATCCTGATTCTAGTGAATCACATGTGTGTGCAGGGATAACGCTCATCTCTCG  
AATCGACCGTGGGTGTCTTTCAACCAGAATCTGGAATATCAGATAGGATACATATGCAGTGGGGTTTTTCGGAGACAATCCACGCCCTAATGATAAAGACAGGCAGTTG  
TGGTCCAGTATCGTCTAATGGAGCAAATGGAGTAAAGGATTTTCATTCAAATACGGCAATGGTGTGGATAGGGGAGAACTAAAAGCATTAGTTCAAGAAAAGGTTT  
TGAGATGATTTGGGATCCGAATGGATGGACTGGGACAGACAATAACTTCTCAATAAAGCAAGATATCGTAGGAATAAAGAGTGGTCAGGATATAGCGGGAGCTCT  
GTTTCAGCATCCAGAACTAACAGGGCTGGATTGTATAAGACCTTGCTTCTGGGTTGAACTAATCAGAGGGCGACCCGAAGAGAACAACAATCTGGACTAGCGGGAGCA  
GCATATCCTTTTGTGGTGTAAACAGTGACACTGTGGGTTGGTCT

>HAP41\_0.00228512 | global\_haplotype frequency=0.002285

CTGTATGACAATTGGAATGGCTAACTTAATATTACAAATTGGAAACATAATCTCAATATGGGTTAGCCACTCAATTCAACTTGGGAATCAAAGTCATATTGAAACATGC  
AATCAAAGCGTCATTACTTATGAAAACAACACTTGGGTAAATCAGACATATGTTAACATCAGCAACACCAACTTTGCTGCTGGACAGTCAGTGGTTCCCGTGAAATTA  
GCGGGCAATTCCTCTCTCTGCCCTGTTAGTGGATGGGCTATATACAGTAAAGACAACAGTGTAAAGAATCGGTTCCAAGGGGGATGTGTTTGTGATAAGGGGAACCAT  
TCATATCATGCTCCCCCTTGAATGCAGAACCTTCTTCTTGACTCAAGGGGCCTTGCTAAATGACAAACATTCCAATGGAACCATTAAAGACAGGAGCCCATATCGA  
ACCCTAATGAGCTGTCCTATTGGTGAAGTTCCTCTCCATACAACACTCAAGATTTGAGTCAGTCGCTTGGTCAGCAAGTGCTTGTGATGATGGCATCAATTGGCTAAC  
AATTGGAATTTCTGGCCAGACAATGGGGCAGTGGCTGTGTTAAAGTACAATGGCATAATAACAGACACTATCAAGAGTTGGAGAAACAATATATTGAGAACACAAG  
AGTCTGAATGTGCATGTGTAATGGTTCCTTGCTTTACCATAATGACCGATGGACCAAGTGTGACAGGGCCTCATACAAGATCTTCAGAATAGAAAAGGGAAAGATA  
GTCAAATCAGTCGAAATGAATGCCCTAATTACTATGAGGAATGCTCCTGTTATCCTGATTCTAGTGAATCACATGTGTGTGCAGGGATAACCGGCATGGCTC  
GAATCGACCGTGGGTGTCTTTCAACCAGAATCTGGAATATCAGATAGGATACATATGCAGTGGG-  
TTTTTCGGAGACAATCCACGCCCTAGTGATAAAGACAGGCAGTTGTGGTCCAGTATCGTCTAATGGAGCAAATGGAGTAAAGGATTTTCATTCAAATACGGCAATGGT  
GTTTGGATAGGGGAGAACTAAAAGCATTAGTTCAAGAAAAGGTTTTGAGATGATTTGGGATCCGAATGGATGGACTGGGACAGACAATAACTTCTCAATAAAGCAAGA  
TATCGTAGGAATAAAGAGTGGTCAGGATATAGCGGGAGTTTTGTTTCAGCATCCAGAACTAACAGGGCTGGATTGTATAAGACCTTGCTTCTGGGTTGAACTAATCA  
GAGGGCGACCCGAAGAGAACAACAATCTGGACTAGCGGGAGCAGCATATCCTTTTGTGGTGTAAACAGTGACACTGTGGGTTGGTCT

>HAP42\_0.00220314 | global\_haplotype frequency=0.002203

CTGTATGACAATTGGAATGGCTAACTTAATATTACAAATTGGAAACATAATCTCAATATGGGTTAGCCACTCAATTCAACTTGGGAATCAAAGTCATATTGAAACATGC  
AATCAAAGCGTCATTAATTATGAAAACAACACTTGGGTAAATCAGACATATGTTAACATCAGCAACACCAACTTTGCTGCTGGACAGTCAGTGGTTCCCGTGAAATTA  
GCGGGCAATTCCTCTCTCTGCCCTGTTAGTGGATGGGCTATATACAGTAAAGACAACAGTGTAAAGAACCGTTCCAAGGGGGATGTGTTTGTGATAAGGGGAACCAT  
TCATATCATGCTCCCCCTTGAATGCAGAACCTTCTTCTTGACTCAAGGGGCCCTTGCTAAATGACAAACATTCCAATGGAACCATTAAAGACAGGAGCCCATATCGA  
ACCCTAATGAGCTGTCCTATTGGTGAAGTTCCTCTCCATACAACACTCAAGATTTGAGTCAGTCGCTTGGTCAGCAAGTGCTTGTGATGATGGCATCAATTGGCTAAC  
AATTGGAATTTCTGGCCAGACAATGGGGCAGTGGCTGTGTTAAAGTACAATGGCATAATAACAGACACTATCAAGAGTTGGAGAAACAATATATTGAGAACACAAG  
AGTCTGAATGTGCATGTGTAATGGTTCTTGCTTTACCATAATGACCGATGGACCAAGTGTGACAGGGCCTCATACAAGATCTTCAGAATAGAAAAGGGAAAGATA  
GTCAAATCAGTCGAAATGAATGCCCTAATTACTATGAGGAATGCTCCTGTTATCCTGATTCTAGTAAATCACATGTGTGTGCAGGGATAACTGGCATGGCTC  
GAATCGACCGTGGGTGTCTTTCAACCAGAATCTGGAATATCAGATAGGATACATATGCAATGGGATTTTCGGAGACAATCCACGCCCTAATGATAAGACAGGCAGTT  
GTGGTCCAGTATCGTCTAATGGAGCAAATGGAGTAAAAGGATTTTCATTCAAATACGGCAATGGTGTGGATAGGGGAGAACTAAAAGCATTAGTTCAAGAAAAGGT  
TTTGAGATGATTTGGGATCCGAATGGATGGACTGGGACAGACAATAAATTCTCAATAAAGCAAGATATCGTAGGAATAAAGAGTGGTCAGGATATAGCGGGAGTTT  
TGTTTCAGCATCCAGAATAACAGGGCTGGATTGTATAAGACCTTGCTTCTGGGTTGAACTAATCAGAGGGCGACCCGAAGAGAACACAATCTGGACTAGCGGGAGC  
AGCATATCCTTTTGTGGTGTAAACAGTGACACTGTGGGTTGGTCT

>HAP43\_0.00217361 | global\_haplotype frequency=0.002174

CTGTATGACAATTGGAATGGCTAACTTAATATTACAAATTGGAAACATAATCTCAATATGGGTTAGCCACTCAATTCAACTTGGGAATCAAAGTCATATTGAAACATGC  
AATCAAAGCGTCATTAATTATGAAAACAACACTTGGGTAAATCAGACATATGTTAACATCAGCAACACCAACTTTGCTGCTGGACAGTCAGTGGTTCCCGTGAAATTA  
GCGGGCAATTCCTCTCTCTGCCCTGTTAGTGGATGGGCTATATACAGTAAAGACAACAGTGTAAAGAACCGTTCCAAGGGGGATGTGTTTGTGATAAGGGGAACCAT  
TCATATCATGCTCCCCCTTGAATGCAGAACCTTCTTCTTGACTCAAGGGGCCCTTGCTAAATGACAAACATTCCAATGGAACCATTAAAGACAGGAGCCCATTCCGA  
ACCCTAATGAGCTGTCCTATTGGTGAAGTTCCTCTCCATACAACACTCAAGATTTGAGTCAGTCGCTTGGTCAGCAAGTGCTTGTGATGATGAGATCGGAAGGCTAAC  
AATTGGAATTTCTGGCCAGACAATGGGGCAGTGGCTGTGTTAAAGTACAATGGCATAATAACAGACACTATCAAGAGTTGGAGAAACAATATATTGAGAACACAAG  
AGTCTGAATGTGCATGTGTAATGGTTCTTGCTTTACCATAATGACCGATGGACCAAGTGTGACAGGGCCTCATACAAGATCTTCAGAATAGAAAAGGGAAAGATA  
GTCAAATCAGTCGAAATGAATGCCCTAATTACTATGAGGAATGCTCCTGTTATCCTGATTCTAGTAAATCACATGTGTGTGCAGGGATAACTGGCATGGCTC  
GAATCGACCGTGGGTGTCTTTCAACCAGAATCTGGAATATCAGATAGGATACATATGCAGTGGGTTTTTCGGAGACAATCCACGCCCTAATGATAAGACAGGCAGTT  
GTGGTCCAGTATCGTCTAATGGAGCAAATGGAGTAAAAGGATTTTCATTCAAATACGGCAATGGTGTGGATAGGGGAGAACTAAAAGCATTAGTTCAAGAAAAGGT  
TTTGAGATGATTTGGGATCCGAATGGATGGACTGGGACAGACAATAAATTCTCAATAAAGCAAGATATCGTAGGAATAAAGAGTGGTCAGGATATAGCGGGAGTTT  
TGTTTCAGCATCCAGAATAACAGGGCTGGATTGTATAAGACCTTGCTTCTGGGTTGAACTAATCAGAGGGCGACCCGAAGAGAACACAATCTGGACTAGCGGGAGC  
AGCATATCCTTTTGTGGTGTAAACAGTGACACTGTGGGTTGGTCT

>HAP44\_0.00199353 | global\_haplotype frequency=0.001994

CTGTATGACAATTGGAATGGCTAACTTAATATTACAAATTGGAAACATAATCTCAATATGGGTTAGCCACTCAATTCAACTTGGGAATCAAAGTCATATTGAAACATGC  
AATCAAAGCGTCATTACTTATGAAAACAACACTTGGGTAAATCAGACATATGTTAACATCAGCAACACCAACTTTGCTGCTGGACAGTCAGTGGTTCCCGTGAAATTA  
GCGGGCAATTCCTCTCTCTGCCCTGTTAGTGGATGGGCTATATACAGTAAAGACAACAGTGTAAAGAACCGTTCCAAGGGGGATGTGTTTGTGATAAGGGGAACCAT  
TCATATCATGCTCCCCCTTGAATGCAGAACCTTCTTCTTGACTCAAGGGGCCTTGCTAAATGACAAACATTCCAATGGAACCATTAAAGACAGGAGCCCATATCGA  
ACCCTAATGAGCTGTCCTATTGGTGAAGTTCCTCTCCATACAACACTCAAGATTTGAGTCAGTCGCTTGGTCAGCAAGTGCTTGTGATGATGGCATCAATTGGCTAAC  
AATTGGAATTTCTGGCCCAGACAATGGGGCAGTGGCTGTGTTAAAGTACAATGGCATAATAACAGACACTATCAAGAGTTGGAGAAACAATATATTGAGAACACAAG  
AGTCTGAATGTGCATGTGTAATGGTTCTTGCTTTACCATAATGACCGATGGACCAAGTGTGACAGGGCCTCATACAAGATCTTCAGAATAGAAAAGGGAAAGATA  
GTCAAATCAGTCGAAATGAATGCCCTAATTACTATGAGGAATGCTCCTGTTATCCTGATTCTAGTAAATCACATGTGTGTGCAGGGATAACTGGCATGGCTC  
GAATCGACCGTGGGTGCTTTCAACCAGAATCTGGAATATCAGATAGGATACATATGCAGTGGGGTTTTCGGAGAGATCGGACGCCCTAATGATAAGACAGGCAGT  
TGTGGTCCAGTATCGTCTAATGGAGCAAATGGAGTAAAGGATTTTCATTCAAATACGGCAATGGTGTGGATAGGGGAACTAAAAGCATTAGTTCAAGAAAAGG  
TTTTGAGATGATTTGGGATCCGAATGGATGGACTGGGACAGACAATAACTTCTCAATAAAGCAAGATATCGTAGGAATAAAGAGTGGTCAGGATATAGCGGGAGTT  
TTGTTACAGCATCCAGAACTAACAGGGCTGGATTGTATAAGACCTTGCTTCTGGGTTGAACTAATCAGAGGGCGACCCGAAGAGAACAACAATCTGGACTAGCGGGAG  
CAGCATATCCTTTTGTGGTGTAAACAGTGACACTGTGGGTTGGTCT

>HAP45\_0.00199311 | global\_haplotype frequency=0.001993

CTGTATGACAATTGGAATGGCTAACTTAATATTACAAATTGGAAACATAATCTCAATATGGGTTAGCCACTCAATTCAACTTGGGAATCAAAGTCATATTGAAACATGC  
AATCAAAGCGTCATTACTTATGAAAACAACACTTGGGTAAATCAGACATATGTTAACATCAGCAACACCAACTTTGCTGCTGGACAGTCAGTGGTTCCCGTGAAATTA  
GCGGGCAATTCCTCTCTCTGCCCTGTTAGTGGATGGGCTATATACAGTAAAGACAACAGTGTAAAGAACCGTTCCAAGGGGGATGTGTTTGTGATAAGGGGAACCAT  
TCATATCATGCTCCCCCTTGAATGCAGAACCTTCTTCTTGACTCAAGGGGCCTTGCTAAATGACAAACATTCCAATGGAACCATTAAAGACAGGAGCCCATATCGA  
ACCCTAATGAGCTGTCCTATTGGTGAAGTTCCTCTCCATACAACACTCAAGATTTGAGTCAGTCGCTTGGTCAGCAAGTGCTTGTGATGATGGCATCAATTGGCTAAC  
AATTGGAATTTCTGGCCCAGACAATGGGGCAGTGGCTGTGTTAAAGTACAATGGCATAATAACAGACACTATCAAGAGTTGGAGAAACAATATATTGAGAACACAAG  
AGTCTGAATGTGCATGTGTAATGGTTCTTGCTTTACCATAATGACCGATGGACCAAGTGTGACAGGGCCTCATACAAGATCTTCAGAATAGAAAAGGGAAAGATA  
GTCAAATCAGTCGAAATGAATGCCCTAATTACTATGAGGAATGCTCCTGTTATCCTGATTCTAGTAAATCACATGTGTGTGCAGGGATAACTGGCATGGCTC  
GAATAGATCGGAAGAGTCTTTCAACCAGAATCTGGAATATCAGATAGGATACATATGCAGTGGGGTTTTCGGAGACAATCCACGCCCTAATGATAAGACAGGCAGTT  
GTGGTCCAGTATCGTCTAATGGAGCAAATGGAGTAAAGGATTTTCATTCAAATACGGCAATGGTGTGGATAGGGGAACTAAAAGCATTAGTTCAAGAAAAGGT  
TTTGAGATGATTT--  
GCTCCATTAGGATGGACTGGGACAGACAATAACTTCTCAATAAAGCAAGATATCGTAGGAATAAAGAGTGGTCAGGATATAGCGGGAGTTTTGTTACGCATCCAGA  
ACTAACAGGGCTGGATTGTATAAGACCTTGCTTCTGGGTTGAACTAATCAGAGGGCGACCCGAAGAGAACAACAATCTGGACTAGCGGGAGCAGCATATCCTTTTGT  
GGTGTAAACAGTGACACTGTGGGTTGGTCT
