# Supplementary material
Source: PubMed Central journal article supplement (PMC4633758)
Supplement: supp_jiv288_jiv288supp_table3.pdf [file supp_jiv288_jiv288supp_table3.pdf]

**Supplementary Table 3**

**A. Details of quasi-species population at day 21**

| Reference NA                     | Pos  | Ref | Var | Frq1   | Frq2   | Frq3   | Pst1   | Pst2   | Pst3   | Fvar | Rvar | Ftot | Rtot | Pval      | Qval      |
|----------------------------------|------|-----|-----|--------|--------|--------|--------|--------|--------|------|------|------|------|-----------|-----------|
| BRISBANE_15_2011_pdm09-NA-332645 | 100  | A   | G   | 1      | 1      | 1      | 1.3704 | 1.305  | 1.0476 | 440  | 61   | 441  | 61   | 0.954764  | 1         |
| BRISBANE_15_2011_pdm09-NA-332645 | 131  | A   | G   | 1      | 1      | 1      | 1.305  | 1.0476 | 1.1811 | 926  | 81   | 928  | 82   | 1         | 1         |
| BRISBANE_15_2011_pdm09-NA-332645 | 135  | G   | T   | 1      | 1      | 1      | 1.305  | 1.0476 | 1.1811 | 894  | 84   | 894  | 85   | 1         | 1         |
| BRISBANE_15_2011_pdm09-NA-332645 | 244  | T   | C   | 1      | 1      | 1      | 1.0064 | 1.0023 | 0.9993 | 1670 | 1892 | 1682 | 1916 | 0.977411  | 1         |
| BRISBANE_15_2011_pdm09-NA-332645 | 316  | A   | G   | 0.9966 | 1      | 1      | 0.9993 | 0.998  | 1.002  | 2099 | 1804 | 2118 | 1811 | 0.977716  | 1         |
| BRISBANE_15_2011_pdm09-NA-332645 | 356  | A   | G   | 0.0366 | 0.0599 | 0.0681 | 0.949  | 1      | 0.9994 | 121  | 94   | 1969 | 1844 | 0.467415  | 1         |
| BRISBANE_15_2011_pdm09-NA-332645 | 356  | A   | C   | 0.0035 | -      | 0.0164 | 0.9992 | -      | 0.9386 | 13   | 10   | 1969 | 1844 | 0.817912  | 1         |
| BRISBANE_15_2011_pdm09-NA-332645 | 357  | A   | C   | 0.7393 | 0.7188 | 0.8018 | 0.9998 | 1.0028 | 0.9985 | 1522 | 1349 | 1992 | 1874 | 0.774507  | 1         |
| BRISBANE_15_2011_pdm09-NA-332645 | 486  | C   | T   | 1      | 1      | 1      | 1      | 1.0142 | 0.9999 | 1726 | 1488 | 1737 | 1495 | 0.991959  | 1         |
| BRISBANE_15_2011_pdm09-NA-332645 | 512  | A   | G   | 0.0056 | -      | 0.0066 | 0.9988 | -      | 0.9993 | 4    | 6    | 1715 | 1674 | 0.736919  | 1         |
| BRISBANE_15_2011_pdm09-NA-332645 | 546  | T   | C   | 0.0035 | -      | 0.0071 | 1      | -      | 1      | 10   | 4    | 2153 | 1975 | 0.269702  | 1         |
| BRISBANE_15_2011_pdm09-NA-332645 | 595  | G   | T   | 0.0088 | -      | 0.0453 | 1      | -      | 0.9805 | 36   | 28   | 1634 | 1680 | 0.441651  | 1         |
| BRISBANE_15_2011_pdm09-NA-332645 | 627  | C   | T   | 0.9894 | 1      | 1      | 1.0007 | 1.2156 | 1      | 1085 | 1310 | 1113 | 1314 | 0.920707  | 1         |
| BRISBANE_15_2011_pdm09-NA-332645 | 961  | A   | G   | 0.9932 | 1      | 1      | 0.9998 | 1.0018 | 1.0033 | 2266 | 1871 | 2279 | 1876 | 0.984775  | 1         |
| BRISBANE_15_2011_pdm09-NA-332645 | 1062 | C   | A   | 0.0252 | 0.0089 | -      | 0.969  | 0.9953 | -      | 9    | 10   | 455  | 1150 | 0.156101  | 1         |
| BRISBANE_15_2011_pdm09-NA-332645 | 1131 | A   | G   | 1      | 0.9938 | 1      | 1.4165 | 1.0032 | 0.9587 | 936  | 558  | 938  | 561  | 1         | 1         |
| BRISBANE_15_2011_pdm09-NA-332645 | 1134 | C   | T   | 1      | 1      | 1      | 1.4165 | 1.0026 | 0.9587 | 931  | 546  | 931  | 546  | 1         | 1         |
| BRISBANE_15_2011_pdm09-NA-332645 | 1191 | T   | A   | 1      | 1      | 0.948  | 0.9587 | 1      | 0.9999 | 1827 | 1275 | 1835 | 1327 | 0.874261  | 1         |
| BRISBANE_15_2011_pdm09-NA-332645 | 1207 | A   | G   | -      | 0.0048 | 0.003  | -      | 0.9974 | 0.9924 | 13   | 5    | 2258 | 1582 | 0.402356  | 1         |
| BRISBANE_15_2011_pdm09-NA-332645 | 1219 | G   | T   | 0.0048 | 0.003  | -      | 0.9974 | 0.9947 | -      | 3    | 12   | 2286 | 1947 | 0.0240316 | 0.2082739 |
| BRISBANE_15_2011_pdm09-NA-332645 | 1231 | G   | A   | 0.0048 | 0.006  | -      | 0.9974 | 0.9936 | -      | 3    | 15   | 2145 | 2010 | 0.0094638 | 0.1230298 |
| BRISBANE_15_2011_pdm09-NA-332645 | 1248 | C   | T   | 1      | 1      | 1      | 1      | 0.9998 | 1.0082 | 2167 | 2295 | 2170 | 2299 | 0.998818  | 1         |
| BRISBANE_15_2011_pdm09-NA-332645 | 1278 | A   | G   | 0.0061 | 0.0056 | -      | 1      | 0.9988 | -      | 15   | 14   | 2800 | 2497 | 1         | 1         |
| BRISBANE_15_2011_pdm09-NA-332645 | 1294 | A   | G   | 1      | 1      | *      | 1.0082 | 0.9994 | *      | 2488 | 2256 | 2505 | 2263 | 0.984358  | 1         |
| BRISBANE_15_2011_pdm09-NA-332645 | 1297 | G   | A   | 0.0768 | 0.0824 | *      | 1      | 1      | *      | 247  | 241  | 2124 | 2314 | 0.627626  | 1         |

Quasi-species frequencies were estimated by first mapping the high-throughput sequencing data to reference NA (Brisbane 15 2011) and then inferring NA haplotypes from mapped reads [12]. The spreadsheet contains frequencies for each detected nucleotide change relative to reference sequence.

**B. Sequences of each inferred NA haplotype in the influenza virus population with corresponding frequencies at day 21**

>HAP0\_0.19903 | global\_haplotype frequency=0.199030

ATAATAACCATTGGTTCGGTCTGTATGACAATTGGAATGGCTAACTTAATATTACAAATTGGAAACATAATCTCAATATGGGTTAGCCACTCAATTCAACTTGGGAATC  
AAAGTCATATTGAAACATGCAATCAAAGCGTCATTACTTATGAAAACAACACTTGGGTAAATCAGACATATGTTAACATCAGCAACACCAACTTTGCTGCTGGACAGT  
CAGTGGTTCCTGTAATAGCGGGCAATTCCTCTCTCTGCCCTGTTAGTGGATGGGCTATATACAGTAAAGACAACAGTGTAAAGAACCGTTCCAAGGGGGATGT  
GTTTGTGATAAGGGACCCATTCATATCATGCTCCCCCTTGAATGCAGAACCTTCTTCTTACTCAAGGGGCCTTGCTAAATGACAAACATTCCAATGGAACCATTAA  
AGACAGGAGCCCATATCGAACCCTAATGAGCTGTCTTATTGGTGAAGTTCCTCTCCATACAACTCAAGATTTGAGTCAGTCGCTTGGTCAGCAAGTGCTTGTGATG  
ATGGCATCAATTGGCTAACAATTGGAATTTCTGGCCAGACAATGGGGCAGTGGCTGTGTTAAAGTACAATGGCATAATAACAGACACTATCAAGAGTTGGAGAAAC  
AATATATTGAGAACACAAGAGTCTGAATGTGCATGTGTAATGGTTCCTTACTTACCATAATGACCGATGGACCAAGTGATGGACAGGCCTCATAACAAGATCTTCAGA  
AGAGAAGAGCACACGTTAGTCAAATCAGTCGAAATGAATGCCCTAATTATTACTATGAGGAATGCTCCTGTTATCCTGATTCTAGTGAATCACATGTGTGTGCAGG  
GATAACTGGCATGGCTCGAATCGACCGTGGGTGTCTTTCAACCAGAATCTGGAATATCAGATAGGATACATATGCAGTGGGGTTTTTCGGAGACAATCCACGCCCTA  
ATGATAAGACAGGCAGTTGTGGTCCAGTATCGTCTAATGGAGCAAATGGAGTAAAGGATTTTCATTCAAATACGGCAATGGTGTGGATAGGGAGAACTAAAAGC  
ATTAGTTCAAGAAAAGGTTTTGAGATGATTTGGGATCCGAATGGATGGACTGGGACAGACAATAACTTCTCAATAAAGCAAGATATCGTAGGAATAAAAAGAGTGGTC  
AGGATATAGCGGGAGTTTTGTTGAGCATCCAGAACTAACAGGGCTGGATTGTATAAGACCTTGCTTCTGGGTTGAACTAATCAGAGGGCGACCCGAAGAGAACACA  
ATCTGGACTAGCGGGAGCAGCATATCCTTTTGTGGTGTAAACAGTGACACTGTGGGTTGGTCT

>HAP1\_0.0958069 | global\_haplotype frequency=0.095807

ATAATAACCATTGGTTCGGTCTGTATGACAATTGGAATGGCTAACTTAATATTACAAATTGGAAACATAATCTCAATATGGGTTAGCCACTCAATTCAACTTGGGAATC  
AAAGTCATATTGAAACATGCAATCAAAGCGTCATTACTTATGAAAACAACACTTGGGTAAATCAGACATATGTTAACATCAGCAACACCAACTTTGCTGCTGGACAGT  
CAGTGGTTCCTGTAATAGCGGGCAATTCCTCTCTCTGCCCTGTTAGTGGATGGGCTATATACAGTAAAGACAACAGTGTAAAGAACCGTTCCAAGGGGGATGT  
GTTTGTGATAAGGGAAACCATTCATATCATGCTCCCCCTTGAATGCAGAACCTTCTTCTTACTCAAGGGGCCTTGCTAAATGACAAACATTCCAATGGAACCATTAA  
AGACAGGAGCCCATATCGAACCCTAATGAGCTGTCTTATTGGTGAAGTTCCTCTCCATACAACTCAAGATTTGAGTCAGTCGCTTGGTCAGCAAGTGCTTGTGATG  
ATGGCATCAATTGGCTAACAATTGGAATTTCTGGCCAGACAATGGGGCAGTGGCTGTGTTAAAGTACAATGGCATAATAACAGACACTATCAAGAGTTGGAGAAAC  
AATATATTGAGAACACAAGAGTCTGAATGTGCATGTGTAATGGTTCCTTACTTACCATAATGACCGATGGACCAAGTGATGGACAGATCTCATAACAAGATCTTCAGA  
ATAGAAAAGGGAAAGATAGTCAAATCAGTCGAAATGAATGCCCTAATTATTACTATGAGGAATGCTCCTGTTATCCTGATTCTAGTGAATCACATGTGTGTGCAGG  
GATAACTGGCATGGCTCGAATCGACCGTGGGTGTCTTTCAACCAGAATCTGGAATATCAGATAGGATACATATGCAGTGGGGTTTTTCGGAGACAATCCACGCCCTA  
ATGATAAGACAGGCAGTTGTGGTCCAGTATCGTCTAATGGAGCAAATGGAGTAAAGGATTTTCATTCAAATACGGCAATGGTGTGGATAGGGAGAACTAAAAGC  
ATTAGTTCAAGAAAAGGTTTTGAGATGATTTGGGATCCGAATGGATGGACTGGGACAGACAATAACTTCTCAATAAAGCAAGATATCGTAGGAATAAAAAGAGTGGTC  
AGGATATAGCGGGAGTTTTGTTGAGCATCCAGAACTAACAGGGCTGGATTGTATAAGACCTTGCTTCTGGGTTGAACTAATCAGAGGGCGACCCGAAGAGAACACA  
ATCTGGACTAGCGGGAGCAGCATATCCTTTTGTGGTGTAAACAGTGACACTGTGGGTTGGTCT

>HAP2\_0.0890282 | global\_haplotype frequency=0.089028

ATAATAACCATTGGTTCGGTCTGTATGACAATTGGAATGGCTAACTTAATATTACAAATTGGAAACATAATCTCAATATGGGTTAGCCACTCAATTCAACTTGGGAATC  
AAAGTCATATTGAAACATGCAATCAAAGCGTCATTACTTATGAAAACAACACTTGGGTAAATCAGACATATGTTAACATCAGCAACACCAACTTTGCTGCTGGACAGT  
CAGTGGTTCCTGTAATAGCGGGCAATTCCTCTCTCTGCCCTGTTAGTGGATGGGCTATATACAGTAAAGACAACAGTGTAAAGAATCGGTTCCAAGGGGGATGT  
GTTTGTGATAAAGGACCCATTCATATCATGCTCCCCCTTGAATGCAGAACCTTCTTCTTGAAGGAGGCTTGTAAATGACAAACATTCCAATGGAACCATTAA  
AGACAGGAGCCCATATCGAACCCTAATGAGCTGTCCTATTGGTGAAGTTCCTCTCCATACAACTCAAGATTTGAGTCAGTCGCTTGGTCAGCAAGTGTGCTGTCATG  
ATGGCATCAATTGGCTAACAATTGGAATTTCTGGCCAGACAATGGGGCAGTGGCTGTGTTAAAGTACAATGGCATAATAACAGACACTATCAAGAGTTGGAGAAAC  
AATATATTGAGAACACAAGAGTCTGAATGTGCATGTGTAATGGTTCTTGTCTTACCATAATGACCGATGGACCAAGTGTGACAGGCCTCATAACAAGATCTTCAGA  
ATAGAAAAGGGAAAGATAGTCAAATCAGTCGAAATGAATGCCCTAATTACTATGAGGAATGCTCCTGTTATCCTGATTCTAGTAAAATCACATGTGTGTGCAGG  
GATAACTGGCATGGCTCGAATCGACCGTGGGTGTCTTTCAACCAGAATCTGGAATATCAGATAGGATACATATGCAGTGGGGTTTTCCGAGACAATCCACGCCCTA  
ATGATAAGACAGGCAGTTGTGGTCCAGTATCGTCTAATGGAGCAAAATGGAGTAAAGGATTTTCATTCAAATACGGCAATGGTGTGGATAGGGGAGAACTAAAAGC  
ATTAGTTCAAGAAAAGGTTTTGAGATGATTTGGGATCCGAATGGATGGACTGGGACAGACAATAACTTCTCAATAAAGCAAGATATTGTAGGAATAAAGAGTGGTCA  
GGATATAGCGGGAGTTTTGTTCCAGCATCCAGAACTAACAGGGCTGGATTGTATAAGACCTTGCTTCTGGGTTGAACTAATCAGAGGGGCGACCCGAAGAGAACACAA  
TCTGGACTAGCGGGAGCAGCATATCCTTTTGTGGTGTAAACAGTGACACTGTGGGTTGGAGA

>HAP3\_0.073739 | global\_haplotype frequency=0.073739

ATAATAACCATTGGTTCGGTCTGTATGACAATTGGAATGGCTAACTTAATATTACAAATTGGAAACATAATCTCAATATGGGTTAGCCACTCAATTCAACTTGGGAATC  
AAAGTCATATTGAAACATGCAATCAAAGCGTCATTACTTATGAAAACAACACTTGGGTAAATCAGACATATGTTAACATCAGCAACACCAACTTTGCTGCTGGACAGT  
CAGTGGTTCCTGTAATAGCGGGCAATTCCTCTCTCTGCCCTGTTAGTGGATGGGCTATATACAGTAAAGACAACAGTGTAAAGAATCGGTTCCAAGGGGGATGT  
GTTTGTGATAAAGGACCCATTCATATCATGCTCCCCCTTGAATGCAGAACCTTCTTCTTGAAGGAGGCTTGTAAATGACAAACATTCCAATGGAACCATTAA  
AGACAGGAGCCCATATCGAACCCTAATGAGCTGTCCTATTGGTGAAGTTCCTCTCCATACAACTCAAGATTTGAGTCAGTCGCTTGGTCAGCAAGTGTGCTGTCATG  
ATGGCATCAATTGGCTAACAATTGGAATTTCTGGCCAGACAATGGGGCAGTGGCTGTGTTAAAGTACAATGGCATAATAACAGACACTATCAAGAGTTGGAGAAAC  
AATATATTGAGAACACAAGAGTCTGAATGTGCATGTGTAATGGTTCTTGTCTTACCATAATGACCGATGGACCAAGTGTGACAGGCCTCATAACAAGATCTTCAGA  
ATAGAAAAGGGAAAGATAGTCAAATCAGTCGAAATGAATGCCCTAATTACTATGAGGAATGCTCCTGTTATCCTGATTCTAGTAAAATCACATGTGTGTGCAGG  
GATAACTGGCATGGCTCGAATCGACCGTGGGTGTCTTTCAACCAGAATCTGGAATATCAGATAGGATACATATGCAGTGGGGTTTTCCGAGACAATCCACGCCCTA  
ATGATAAGACAGGCAGTTGTGGTCCAGTATCGTCTAATGGAGCAAAATGGAGTAAAGGATTTTCATTCAAATACGGCAATGGTGTGGATAGGGGAGAACTAAAAGC  
ATTAGTTCAAGAAAAGGTTTTGAGATGATTTGGGATCCGAATGGATGGACTGGGACAGACAATAACTTCTCAATAAAGCAAGATATCGTAGGAATTCTTGATCTGTCA  
GGATATAGCGGGAGTTTTGTTCCAGCATCCAGAACTAACAGGGCTGGATTGTATAAGACCTTGCTTCTGGGTTGAACTAATCAGAGGGGCGACCCGAAAAGAACACAA  
TCTGGACTAGCGGGAGCAGCATATCCTTTTGTGGTGTAAACAGTGACACTGTGGGTTGGTCT

>HAP4\_0.0469896 | global\_haplotype frequency=0.046990

ATAATAACCATTGGTTCGGTCTGTATGACAATTGGAATGGCTAACTTAATATTACAAATTGGAAACATAATCTCAATATGGGTTAGCCACTCAATTCAACTTGGGAATC  
AAAGTCATATTGAAACATGCAATCAAAGCGTCATTACTTATGAAAACAACACTTGGGTAAATCAGACATATGTTAACATCAGCAACACCAACTTTGCTGCTGGACAGT  
CAGTGGTTCCTGTAATTAGCGGGCAATTCCTCTCTCTGCCCTGTTAGTGGATGGGCTATATACAGTAAAGACAACAGTGTAAAGAATCGGTTCCAAGGGGGATGT  
GTTTGCATAAGGGAACCATTTCATATCATGCTCCCCCTTGAATGCAGAACCTTCTTCTTACTCAAGGGGCCTTGCTAAATGACAAACATTCCAATGGAACCATTAA  
AGACAGGAGCCCATATCGAACCCTAATGAGCTGTCCTATTGGTGAAGTTCCTCTCCATACAACTCAAGATTTGAGTCAGTCGCTTGGTCAGCAAGTGTGCTTGCATG  
ATGGCATCAATTGGCTAACAATTGGAATTTCTGGCCAGACAATGGGGCAGTGGCTGTGTTAAAGTACAATGGCATAATAACAGACACTATCAAGAGTTGGAGAAAC  
AATATATTGAGAACACAAGAGTCTGAATGTGCATGTGTAATGGTTCCTTACCATAATGACCGA--  
GATCAAGAGCTGGACAGGCCTCATAACAAGATCTTCAGAATAGAAAAGGGAAAGATAGTCAAATCAGTCGAAATGAATGCCCTAATTATTACTATGAGGAATGCTCC  
TGTTATCTGATTCTAGTGAATCACATGTGTGTGCAGGGATAACTGGCATGGCTCGAATCGACCGTGGGTGTCTTTCAACCAGAATCTGGAATATCAGATAGGATA  
CATATGCAGTGGGGTTTTTCGGAGACAATCCACGCCCTAATGATAAGACAGGCAGTTGTGGTCCAGTATCGTCTAATGGAGCAAATGGAGTAAAAGGATTTTCATTCA  
AATACGGCAATGGTGTGGATAGGGAGAATAAAAGCATTAGTTCAAGAAAAGGTTTTGAGATGATTTGGGATCCGAATGGATGGACTGGGACAGACAATAACTTC  
TCAATAAAGCAAGATATCGTAGGAATAAAAGAGTGGTCAGGATATAGCGGGAGTTTTGTTTCAGCATCCAGAATAACAGGGCTGGATTGTATAAGACCTTGCTTCTG  
GGTTGAACTAATCAGAGGGCGACCCGAAGAGAACAATCTGGACTAGCGGGAGCAGCATATCCTTTTGTGGTGTAAACAGTGACACTGTGGGTTGGTCT

>HAP5\_0.0340458 | global\_haplotype frequency=0.034046

ATAATAACCATTGGTTCGGTCTGTATGACAATTGGAATGGCTAACTTAATATTACAAATTGGAAACATAATCTCAATATGGGTTAGCCACTCAATTCAACTTGGGAATC  
AAAGTCATATTGAAACATGCAATCAAAGCGTCATTACTTATGAAAACAACACTTGGGTAAATCAGACATATGTTAACATCAGCAACACCAACTTTGCTGCTGGACAGT  
CAGTGGTTCCTGTAATTAGCGGGCAATTCCTCTCTCTGCCCTGTTAGTGGATGGGCTATATACAGTAAAGACAACAGTGTAAAGAATCGGTTCCAAGGGGGATGT  
GTTTGCATAAGGGAACCATTTCATATCATGCTCCCCCTTGAATGCAGAACCTTCTTCTTACTCAAGGGGCCTTGCTAAATGACAAACATTCCAATGGAACCATTAA  
AGACAGGAGCCCATATCGAACCCTAATGAGCTGTCCTATTGGTGAAGTTCCTCTCCATACAACTCAAGATTTGAGTCAGTCGCTTGGTCAGCAAGTGTGCTTGCATG  
ATGGCATCAATTGGCTAACAATTGGAATTTCTAGATCAGACACACGGGCAGTGGCTGTGTTAAAGTACAATGGCATAATAACAGACACTATCAAGAGTTGGAGAAAC  
AATATATTGAGAACACAAGAGTCTGAATGTGCATGTGTAATGGTTCCTTACCATAATGACCGATGGACCAAGTGATGGACAGGCCTCATAACAAGATCTTCAGA  
ATAGAAAAGGGAAAGATAGTCAAATCAGTCGAAATGAATGCCCTAATTATTACTATGAGGAATGCTCCTGTTATCCTGATTCTAGTGAATCACATGTGTGTGCAGG  
GATAACTGGCATGGCTCGAATCGACCGTGGGTGTCTTTCAACCAGAATCTGGAATATCAGATAGGATACATATGCAGTGGGGTTTTTCGGAGACAATCCACGCCCTA  
ATGATAAGACAGGCAGTTGTGGTCCAGTATCGTCTAATGGAGCAAATGGAGTAAAAGGATTTTCATTCAAATACGGCAATGGTGTGGATAGGGAGAATAAAAGC  
ATTAGTTCAAGAAAAGGTTTTGAGATGATTTGGGATCCGAATGGATGGACTGGGACAGACAATAACTTCTCAATAAAGCAAGATATCGTAGGAATAAAAGAGTGGTC  
AGGATATAGCGGGAGTTTTGTTTCAGCATCCAGAATAACAGGGCTGGATTGTATAAGACCTTGCTTCTGGGTTGAACTAATCAGAGGGCGACCCGAAGAGAACA  
ATCTGGACTAGCGGGAGCAGCATATCCTTTTGTGGTGTAAACAGTGACACTGTGGGTTGGTCT

>HAP6\_0.030852 | global\_haplotype frequency=0.030852

ATAATAACCATTGGTTCGGTCTGTATGACAATTGGAATGGCTAACTTAATATTACAAATTGGAAACATAATCTCAATATGGGTTAGCCACTCAATTCAACTTGGGAATC  
AAAGTCATATTGAAACATGCAATCAAAGCGTCATTACTTATGAAAACAACACTTGGGTAAATCAGACATATGTTAACATCAGCAACACCAACTTTGCTGCTGGACAGT  
CAGTGGTTCCTGTAATAGCGGGCAATTCCTCTCTCTGCCCTGTGATCGGATGGGCTATATACAGTAAAGACAACAGTGTAGAATCGGTTCCAAGGGGGATGT  
GTTTGTGATAAGGGACCCATTCATATCATGCTCCCCCTTGAATGCAGAACCTTCTTCTTGAAGTCAAGGGGCCTTGCTAAATGACAAACATTCCAATGGAACCATTAA  
AGACAGGAGCCCATATCGAACCTAATGAGCTGTCCTATTGGTGAAGTTCCTCTCCATACAACTCAAGATTTGAGTCAGTCGCTTGGTCAGCAAGTGCTTGTGATG  
ATGGCATCAATTGGCTAACAATTGGAATTTCTGGCCAGACAATGGGGCAGTGGCTGTGTTAAAGTACAATGGCATAATAACAGACACTATCAAGAGTTGGAGAAAC  
AATATATTGAGAACACAAGAGTCTGAATGTGCATGTGTAATGGTTCCTTACCATAATGACCGATGGACCAAGTGATGGACAGGCCTCATAACAAGATCTTCAGA  
ATAGAAAAGGGAAAGATAGTCAAATCAGTCGAAATGAATGCCCTAATTACTATGAGGAATGCTCCTGTTATCCTGATTCTAGTGAAATCACATGTGTGTGCAGG  
GATAACTGGCATGGCTCGAATCGACCGTGGGTGTCTTTCAACCAGAATCTGGAATATCAGATAGGATACATATGCAGTGGGGTTTTTCGGAGACAATCCACGCCCTA  
ATGATAAGACAGGCAGTTGTGGTCCAGTATCGTCTAATGGAGCAAATGGAGTAAAGGATTTTCATTCAAATACGGCAATGGTGTGGATAGGGGAGAACTAAAAGC  
ATTAGTTCAAGAAAAGGTTTTGAGATGATTTGGGATCCGAATGGATGGACTGGGACAGACAATAACTTCTCAATAAAGCAAGATATCGTAGGAATAAAGAGTGGTC  
AGGATATAGCGGGAGTTTTGTTGAGCATCCAGAACTAACAGGGCTGGATTGTATAAGACCTTGCTTCTGGGTTGAACTAATCAGAGGGCGACCCGAAGAGAACACA  
ATCTGGACTAGCGGGAGCAGCATATCCTTTTGTGGTGTAAACAGTGACACTGTGGGTTGGTCT

>HAP7\_0.0241398 | global\_haplotype frequency=0.024140

ATAATAACCATTGGTTCGGTCTGTATGACAATTGGAATGGCTAACTTAATATTACAAATTGGAAACATAATCTCAATATGGGTTAGCCACTCAATTCAACTTGGGAATC  
AAAGTCATATTGAAACATGCAATCAAAGCGTCATTACTTATGAAAACAACACTTGGGTAAATCAGACATATGTTAACATCAGCAACACCAACTTTGCTGCTGGACAGT  
CAGTGGTTCCTGTAATAGCGGGCAATTCCTCTCTCTGCCCTGTTAGTGGATGGGCTATATACAGTAAAGACAACAGTGTAGAATCGGTTCCAAGGGGGATGT  
GTTTGTGATAAGGGACCCATTCATATCATGCTCCCCCTTGAATGCAGAACCTTCAGATCGACTCAAGGGGCCTTGCTAAATGACAAACATTCCAATGGAACCATTAA  
AAGACAGGAGCCCATATCGAACCTAATGAGCTGTCCTATTGGTGAAGTTCCTCTCCATACAACTCAAGATTTGAGTCAGTCGCTTGGTCAGCAAGTGCTTGTGAT  
GATGGCATCAATTGGCTAACAATTGGAATTTCTGGCCAGACAATGGGGCAGTGGCTGTGTTAAAGTACAATGGCATAATAACAGACACTATCAAGAGTTGGAGAAA  
CAATATATTGAGAACACAAGAGTCTGAATGTGCATGTGTAATGGTTCCTTACCATAATGACCGATGGACCAAGTGATGGACAGGCCTCATAACAAGATCTTCAG  
AATAGAAAAGGGAAAGATAGTCAAATCAGTCGAAATGAATGCCCTAATTACTATGAGGAATGCTCCTGTTATCCTGATTCTAGTGAAATCACATGTGTGTGCAG  
GGATAACTGGCATGGCTCGAATCGACCGTGGGTGTCTTTCAACCAGAATCTGGAATATCAGATAGGATACATATGCAGTGGGGTTTTTCGGAGACAATCCACGCCCT  
AATGATAAGACAGGCAGTTGTGGTCCAGTATCGTCTAATGGAGCAAATGGAGTAAAGGATTTTCATTCAAATACGGCAATGGTGTGGATAGGGGAGAACTAAAAG  
CATTAGTTCAAGAAAAGGTTTTGAGATGATTTGGGATCCGAATGGATGGACTGGGACAGACAATAACTTCTCAATAAAGCAAGATATCGTAGGAATAAAGAGTGGT  
CAGGATATAGCGGGAGTTTTGTTGAGCATCCAGAACTAACAGGGCTGGATTGTATAAGACCTTGCTTCTGGGTTGAACTAATCAGAGGGCGACCCGAAGAGAACAC  
AATCTGGACTAGCGGGAGCAGCATATCCTTTTGTGGTGTAAACAGTGACACTGTGGGTTGGTCT

>HAP8\_0.0228783 | global\_haplotype frequency=0.022878

ATAATAACCATTGGTTCGGTCTGTATGACAATTGGAATGGCTAACTTAATATTACAAATTGGAAACATAATCTCAATATGGGTTAGCCACTCAATTCAACTTGGGAATC  
AAAGTCATATTGAAACATGCAATCAAAGCGTCATTACTTATGAAAACAACACTTGGGTAAATCAGACATATGTTAACATCAGCAACACCAACTTTGCTGCTGGACAGT  
CAGTGGTTCCTCGTAAATTAGCGGGCAATTCCTCTCTCTGCCCTGTTAGTGGATGGGCTATATACAGTAAAGACAACAGTGTAAAGAATCGGTTCCAAGGGGGATGT  
GTTTGTGATAAGGGACCCATTTCATATCATGCTCCCCCTTGAATGCAGAACCTTCTTCTTGAAGGCGCCTTGGTAAATGACAAACATTCCAATGGAACCATTAA  
AGACAGGAGCCCATATCGAACCCTAATGAGCTGTCTATTGGTGAAGTTCCTCTCCATACAACACTCAAGATTTGAGTCAGTCGCTTGGTCAGCAAGTGTGCTTGTGATG  
ATGGCATCAATTGGCTAACAATTGGAATTTCTGGCCAGACAATGGGGCAGTGGCTGTGTTAAAGTACAATGGCATAATAACAGACACTATCAAGAGTTGGAGAAAC  
AATATATTGAGAACAAGAGTCTGAATGTGCATGTGTAATGGTTCCTTACCATAATGACCGATGGACCAAGTGTGACAGGCCTCATAAAGATCTTCAGA  
ATAGAAAAGGGAAAGATAGTCAAATCAGTCGAAATGAATGCCCTAATTACTATGAGGAATGCTCCTGTTATCCTGATTCTAGTGAATCACATGTGTGTGCAGG  
GATAACTGGCATGGCTCGAATCGACCGTGGGTGTCTTTCAACCAGAATCTGGAATATCAGATAGGATACATATGCAGTGGGGTTTTCGGAGACAATCCACGCCCTA  
ATGATAAGACAGGCAGTTGTGGTCCAGTATCGTCTAATGGAGCAAATGGAGTAAAGGATTTTTCAATCAAATACGGCAATGGTGTGGATAGGGAGAACTAAAAGC  
ATTAGTTCAAGAAAAGGTTTTGAGATGATTTGGGATCCGAATGGATGGACTGGGACAGACAATAACTTCTCAATAAAGCAAGATATCGTAGGAATAAAGAGTGGTC  
AGGATATAGCGGGAGTTTTGTTGAGCATCCAGAACTAACAGGGCTGGATTGTATAAGACCTTGCTTCTGGGTTGAACTAATCAGA--  
GAGATCCGAAGAGAACACAATCTGGACTAGCGGGAGCAGCATATCCTTTTGTGGTGTAACAGTGACACTGTGGGTTGGTCT

>HAP9\_0.0206349 | global\_haplotype frequency=0.020635

ATAATAACCATTGGTTCGGTCTGTATGACAATTGGAATGGCTAACTTAATATTACAAATTGGAAACATAATCTCAATATGGGTTAGCCACTCAATTCAACTTGGGAATC  
AAAGTCATATTGAAACATGCAATCAAAGCGTCATTACTTATGAAAACAACACTTGGGTAAATCAGACATATGTTAACATCAGCAACACCAACTTTGCTGCTGGACAGT  
CAGTGGTTCCTCGTAAATTAGCGGGCAATTCCTCTCTCTGCCCTGTTAGTGGATGGGCTATATACAGTAAAGACAACAGTGTAAAGAATCGGTTCCAAGGGGGATGT  
GTTTGTGATAAGGGACCCATTTCATATCATGCTCCCCCTTGAATGCAGAACCTTCTAGATGACTCAAGGGCGCCTTGGTAAATGACAAACATTCCAATGGAACCATTAA  
AGACAGGAGCCCATATCGAACCCTAATGAGCTGTCTATTGGTGAAGTTCCTCTCCATACAACACTCAAGATTTGAGTCAGTCGCTTGGTCAGCAAGTGTGCTTGTGATG  
ATGGCATCAATTGGCTAACAATTGGAATTTCTGGCCAGACAATGGGGCAGTGGCTGTGTTAAAGTACAATGGCATAATAACAGACACTATCAAGAGTTGGAGAAAC  
AATATATTGAGAACAAGAGTCTGAATGTGCATGTGTAATGGTTCCTTACCATAATGACCGATGGACCAAGTGTGACAGGCCTCATAAAGATCTTCAGA  
ATAGAAAAGGGAAAGATAGTCAAATCAGTCGAAATGAATGCCCTAATTACTATGAGGAATGCTCCTGTTATCCTGATTCTAGTGAATCACATGTGTGTGCAGG  
GATAACTGGCATGGCTCGAATCGACCGTGGGTGTCTTTCAACCAGAATCTGGAATATCAGATAGGATACATATGCAGTGGGGTTTTCGGAGACAATCCACGCCCTA  
ATGATAAGACAGGCAGTTGTGGTCCAGTATCGTCTAATGGAGCAAATGGAGTAAAGGATTTTTCAATCAAATACGGCAATGGTGTGGATAGGGAGAACTAAAAGC  
ATTAGTTCAAGAAAAGGTTTTGAGATGATTTGGGATCCGAATGGATGGACTGGGACAGACAATAACTTCTCAATAAAGCAAGATATCGTAGGAATAAAGAGTGGTC  
AGGATATAGCGGGAGTTTTGTTGAGCATCCAGAACTAACAGGGCTGGATTGTATAAGACCTTGCTTCTGGGTTGAACTAATCAGAGGGCGACCCGAAGAGAACACA  
ATCTGGACTAGCGGGAGCAGCATATCCTTTTGTGGTGTAACAGTGACACTGTGGGTTGGTCT

>HAP10\_0.0198118 | global\_haplotype frequency=0.019812

ATAATAACCATTGGTTCGGTCTGTATGACAATTGGAATGGCTAACTTAATATTACAAATTGGAAACATAATCTCAATATGGGTTAGCCACTCAATTCAACTTGGGAATC  
AAAGTCATATTGAAACATGCAATCAAAGCGTCATTACTTATGAAAACAACACTTGGGTAAATCAGACATATGTTAACATCAGCAACACCAACTTTGCTGCTGGACAGT  
CAGTGGTTCCTGTAATAGCGGGCAATTCCTCTCTCTGCCCTGTTAGTGGATGGGCTATATACAGTAAAGACAACAGTGTAAAGAATCGGTTCCAAGGGGGATGT  
GTTTGTGATAAGGGAACCATTTCATATCATGCTCCCCCTTGAATGCAGAACCTTCTTCTTGACTCAAGGGGCCTTGCTAAATGACAAACATTCCAATGGAACCATTAA  
AGACAGGAGCCCATATCGAACCTAATGAGCTGTCCTATTGGTGAAGTTCCTCTCCATACAACTCAAGATTTGAGTCAGTCGCTTGGTCAGCAAGTGCTTGTGATG  
ATAG-  
ATCAAGAGGCTAACAAATTGGAATTTCTGGCCCAGACAATGGGGCAGTGGCTGTGTTAAAGTACAATGGCATAATAACAGACACTATCAAGAGTTGGAGAAACAATAT  
ATTGAGAACACAAGAGTCTGAATGTGCATGTGTAATGGTTCCTGCTTTACCATAATGACCGATGGACCAAGTATGAGACAGGCCTCATAACAAGATCTTCAGAATAG  
AAAAGGGAAAGATAGTCAAATCAGTCGAAATGAATGCCCTAATTACTATGAGGAATGCTCCTGTTATCCTGATTCTAGTGAATCACATGTGTGTGCAGGGATA  
ACTGGCATGGCTCGAATCGACCGTGGGTGTCTTTCAACCAGAATCTGGAATATCAGATAGGATACATATGCAGTGGGGTTTTTCGGAGACAATCCACGCCCTAATGA  
TAAGACAGGCAGTTGTGGTCCAGTATCGTCTAATGGAGCAAATGGAGTAAAAGGATTTTCATTCAAATACGGCAATGGTGTGGATAGGGAGAACTAAAAGCATTAA  
GTTCAAGAAAAGGTTTTGAGATGATTTGGGATCCGAATGGATGGACTGGGACAGACAATAACTTCTCAATAAAGCAAGATATCGTAGGAATAAAGAGTGGTCAGGA  
TATAGCGGGAGTTTTGTTGAGCATCCAGAACTAACAGGGCTGGATTGTATAAGACCTTGCTTCTGGGTTGAACTAATCAGAGGGCGACCCGAAGAGAACAACAATCT  
GGACTAGCGGGAGCAGCATATCCTTTTGTGGTGTAAACAGTGACACTGTGGGTTGGTCT

>HAP11\_0.014785 | global\_haplotype frequency=0.014785

ATAATAACCATTGGTTCGGTCTGTATGACAATTGGAATGGCTAACTTAATATTACAAATTGGAAACATAATCTCAATATGGGTTAGCCACTCAATTCAACTTGGGAATC  
AAAGTCATATTGAAACATGCAATCAAAGCGTCATTACTTATGAAAACAACACTTGGGTAAATCAGACATATGTTAACATCAGCAACACCAACTTTGCTGCTGGACAGT  
CAGTGGTTCCTGTAATAGCGGGCAATTCCTCTCTCTGCCCTGTTAGTGGATGGGCTATATACAGTAAAGACAACAGTGTAAAGAATCGGTTCCAAGGGGGATGT  
GTTTGTGATAAGGGAACCATTTCATATCATGCTCCCCCTTGAATGCAGAACCTTCTTCTTGACTCAAGGGGCCTTGCTAAATGACAAACATTCCAATGGAACCATTAA  
AGACAGGAGCCCATATCGAACCTAATGAGCTGTCCTATTGGTGAAGTTCCTCTCCATACAACTCAAGATTTGAGTCAGTCGCTTGGTCAGCAAGTGCTTGTGATG  
ATGGCATCAATTGGCTAACAAATTGGAATTTCTGGCTCGGAAAATGGGGCAGTGGCTGTGTTAAAGTACAATGGCATAATAACAGACACTATCAAGAGTTGGAGAAAC  
AATATATTGAGAACAACAAGAGTCTGAATGTGCATGTGTAATGGTTCCTGCTTTACCATAATGACCGATGGACCAAGTATGAGACAGGCCTCATAACAAGATCTTCAGA  
ATAGAAAAGGGAAAGATAGTCAAATCAGTCGAAATGAATGCCCTAATTACTATGAGGAATGCTCCTGTTATCCTGATTCTAGTGAATCACATGTGTGTGCAGG  
GATAACTGGCATGGCTCGAATCGACCGTGGGTGTCTTTCAACCAGAATCTGGAATATCAGATAGGATACATATGCAGTGGGGTTTTTCGGAGACAATCCACGCCCTA  
ATGATAAGACAGGCAGTTGTGGTCCAGTATCGTCTAATGGAGCAAATGGAGTAAAAGGATTTTCATTCAAATACGGCAATGGTGTGGATAGGGAGAACTAAAAGC  
ATTAGTTCAAGAAAAGGTTTTGAGATGATTTGGGATCCGAATGGATGGACTGGGACAGACAATAACTTCTCAATAAAGCAAGATATCGTAGGAATAAAGAGTGGTC  
AGGATATAGCGGGAGTTTTGTTGAGCATCCAGAACTAACAGGGCTGGATTGTATAAGACCTTGCTTCTGGGTTGAACTAATCAGAGGGCGACCCGAAGAGAACAACA  
ATCTGGACTAGCGGGAGCAGCATATCCTTTTGTGGTGTAAACAGTGACACTGTGGGTTGGTCT

>HAP12\_0.0111078 | global\_haplotype frequency=0.011108

ATAATAACCATTGGTTTCGGTCTGTATGACAATTGGAATGGCTAACTTAATATTACAAATTGGAAACATAATCTCAATATGGGTTAGCCACTCAATTCAACTTGGGAATC  
AAAGTCATATTGAAACATGCAATCAAAGCGTCATTACTTATGAAAACAACACTTGGGTAAATCAGACATATGTTAACATCAGCAACACCAACTTTGCTGCTGGACAGT  
CAGTGGTTCCCGTGAAATTAGCGGGCAATTCCTCTCTCTGCCCTGTTAGTGGATGGGCTATATACAGTAAAGACAACAGTGTAAAGAATCGGTTCCAAGGGGGATGT  
GTTTGTGATAAGGGACCCATTCATATCATGCTCCCCCTTGAATGCAGAACCTTCTTCTTGA CTCAAGGGGCCTTGCTAAATGACAAACATTCCAATGGAACCATTAA  
AGACAGGAGCCCATATCGAACCCTAATGAGCTGTCCTATTGGTGAAGTTCCTCTCCATACAACTCAAGATTTGAGTCAGTCGCTTGGTCAGCAAGTGCTTGTGATG  
ATGGCATCAATTGGCTAACAATTGGAATTTCTGGCCAGACAATGGGGCAGTGGCTGTGTTAAAGTACAATGGCATAATAACAGACACTATCAAGAGTTGGAGAAAC  
AATATATTGAGAACACAAGAGTCTGAATGTGCATGTGTAATGGTTCTTCTTACCATAATGACCGATGGACCAAGTGATGGACAGGCCTCATAACAAGATCTTCAGA  
ATAGAAAAGGGAAAGATAGTCAAATCAGTCGAAATGAATGCCCTAATTACTATGAGGAATGCTCCTGTTATCCTGATTCTAGTGAAATCACATGTGTGTGCAGG  
GATAACTGGCATGGCTCGAATCGACCGTGGGTGTCTTTCAACCAGAATCTGGAATATCAGATAGGATACATATGCAGTGGGGTTTTTCGGAGACAATCCACGCCCTA  
ATGATAAGACAGGCAGTTGTGGTCCAGTATCGTCTAATGGAGCAAATGGAGTAAAGGATTTTCATTCAAATACGGCAATGGTGTGGATAGGGGAGAACTAAAAGC  
ATTAGTTCAAGAAAAGGTTTTGAGATGATTTGGGATCCGAATGGATGGACTGGGACAGACAATAACTTCTCAATAAAGCAAGATATCGTAGGAATAAAGAGTGGTC  
AGGATATAGCGGGAGTTTTGTTGAGCATCCAGAACTAACAGGGCTGGATTGTATATCTCCTTGCTTCTGGGTTGAACTAATCAGAGGGCGACCCGAAGAGAACACA  
ATCTGGACTAGCGGGAGCAGCATATCCTTTTGTGGTGTAAACAGTGACACTGTGGGTTGGTCT

>HAP13\_0.0110229 | global\_haplotype frequency=0.011023

ATAATAACCATTGGTTTCGGTCTGTATGACAATTGGAATGGCTAACTTAATATTACAAATTGGAAACATAATCTCAATATGGGTTAGCCACTCAATTCAACTTGGGAATC  
AAAGTCATATTGAAACATGCAATCAAAGCGTCATTACTTATGAAAACAACACTTGGGTAAATCAGACATATGTTAACATCAGCAACACCAACTTTGCTGCTGGACAGT  
CAGTGGTTCCCGTGAAATTAGCGGGCAATTCCTCTCTCTGCCCTGTTAGTGGATGGGCTATATACAGTAAAGACAACAGTGTAAAGAATCGGTTCCAAGGGGGATGT  
GTTTGTGATAAGGGACCCATTCATATCATGCTCCCCCTTGAATGCAGAACCTTCTTCTTGA CTCAAGGGGCCTTGCTAAATGACAAACATTCCAATGGAACCATTAA  
AGACAGGAGCCCATATCGAACCCTAATGAGCTGTCCTATTGGTGAAGTCCCCTCTCCATACAACTCAAGATTTGAGTCAGTCGCTTGGTCAGCAAGTGCTTGTGATG  
ATGGCATCAATTGGCTAACAATTGGAATTTCTGGCCAGACAATGGGGCAGTGGCTGTGTTAAAGTACAATGGCATAATAACAGACACTATCAAGAGTTGGAGAAAC  
AATATATTGAGAACACAAGAGTCTGAATGTGCATGTGTAATGGTTCTTCTTACCATAATGACCGATGGACCAAGTGATGGACAGGCCTCATAACAAGATCTTCAGA  
ATAGAAAAGGGAAAGATAGT-  
AGATCGGTGCAAAATGAATGCCCTAATTACTATGAGGAATGCTCCTGTTATCCTGATTCTAGTGAAATCACATGTGTGTGCAGGGATAACTGGCATGGCTCGAA  
TCGACCGTGGGTGTCTTTCAACCAGAATCTGGAATATCAGATAGGATACATATGCAGTGGGGTTTTTCGGAGACAATCCACGCCCTAATGATAAGACAGGCAGTTGT  
GGTCCAGTATCGTCTAATGGAGCAAATGGAGTAAAGGATTTTCATTCAAATACGGCAATGGTGTGGATAGGGGAGAACTAAAAGCATTAGTTCAAGAAAAGGTTTT  
GAGATGATTTGGGATCCGAATGGATGGACTGGGACAGACAATAACTTCTCAATAAAGCAAGATATCGTAGGAATAAAGAGTGGTCAGGATATAGCGGGAGTTTTGT  
TCAGCATCCAGAACTAACAGGGCTGGATTGTATAAGACCTTGCTTCTGGGTTGAACTAATCAGAGGGCGACCCGAAGAGAACACAATCTGGACTAGCGGGAGCAGC  
ATATCCTTTTGTGGTGTAAACAGTGACACTGTGGGTTGGTCT



>HAP14\_0.0107724 | global\_haplotype frequency=0.010772

ATAATAACCATTGGTTCGGTCTGTATGACAATTGGAATGGCTAACTTAATATTACAAATTGGAAACATAATCTCAATATGGGTTAGCCACTCAATTCAACTTGGGAATC  
AAAGTCATATTGAAACATGCAATCAAAGCGTCATTACTTATGAAAACAACACTTGGGTAAATCAGACATATGTTAACATCAGCAACACCAACTTTGCTGCTGGACAGT  
CAGTGGTTCCTGTAATTAGCGGGCAATTCCTCTCTCTGCCCTGTTAGTGGATGGGCTATATACAGTAAAGACAACAGTGTAAAGAATCGGTTCCAAGGGGGATGT  
GTTTGTGATAAGGGACCCATTCATATCATGCTCCCCCTTGAATGCAGAACCTTCTTCTTACTCAAGGGGCCTTGCTAAATGACAAACATTCCAATGGAACCATTAA  
AGACAGGAGCCCATATCGAACCTAATGAGCTGTCCTATTGGTGAAGTTCCTCTCCATACAACTCAAGATTTGAGTCAGTCGCTTGGTCAGCAAGTGTGCTGTCATG  
ATGGCATCAATTGGCTAACAATTGGAATTTCTGGCCAGACAATGGGGCAGTGGCTGTGTTAAAGTACAATGGCATAATAACAGACACTATCAAGAGTTGGAGAAAC  
AATATATTGAGAACAACAAGAGTCTGAATGTGCATGTGTAATGGTTCCTTACTTACCATAATGACCGATGGACCAAGTGTGACAGGCCTCATAAAGATCTTCAGA  
ATAGAAAAGGGAAAGATAGTCAAATCAGTCGAAATGAATGCCCTAATTACTATGAGGAATGCTCCTGTTATCCTGATTCTAGTGAATCACATGTGTGTGCAGG  
GATAACTGGCATGGCTCGAATCGACCGTGGGTGTCTTTCAACCAGAATCTGGAATATCAGATAGGATACATATGCAGTGGGGTTTTCGGAGACAATCCACGCCCTA  
ATGATAAGACAGGCAGTTGTGGTCCAGTATCGTCTAATGGAGCAAATGGAGTAAAGGATTTTCATTCAAATACGGCAATGGTGTGGATAGGGAGAACTAAAAGC  
ATTAGTTCAAGAAAAGGTTTTGAGATGATTTGGGATCCGAATGGATGGACTGGGACAGACAATAACTTCTCAATAAAGCAAGATATCGTAGGAATAAAGAGTGGTC  
AGGATATAGCGGGAGTTTTGTTTCCAGCATCCAGAACTAACAGGGCTGGATTGTATACGACGCT-  
CTTCCGAGTTGAACTAATCAGAGGGCGACCCGAAGAGAACACAATCTGGACTAGCGGGAGCAGCATATCCTTTTGTGGTGTAAACAGTGACACTGTGGGAAGAACA

>HAP15\_0.00960265 | global\_haplotype frequency=0.009603

ATAATAACCATTGGTTCGGTCTGTATGACAATTGGAATGGCTAACTTAATATTACAAATTGGAAACATAATCTCAATATGGGTTAGCCACTCAATTCAACTTGGGAATC  
AAAGTCATATTGAAACATGCAATCAAAGCGTCATTACTTATGAAAACAACACTTGGGTAAATCAGACATATGTTAACATCAGCAACACCAACTTTGCTGCTGGACAGT  
CAGTGGTTCCTGTAATTAGCGGGCAATTCCTCTCTCTGCCCTGTTAGTGGATGGGCTATATACAGTAAAGACAACAGTGTAAAGAATCGGTTCCAAGGGGGATGT  
GTTTGTGATAAGGGGACCCATTCATATCATGCTCCCCCTTGAATGCAGAACCTTCTTCTTACTCAAGGGGCCTTGCTAAATGACAAACATTCCAATGGAACCATTAA  
AGACAGGAGCCCATATAGATCGGAAGTGAAGTGTGCTTATTGGTGAAGTTCCTCTCCATACAACTCAAGATTTGAGTCAGTCGCTTGGTCAGCAAGTGTGCTGTCATG  
ATGGCATCAATTGGCTAACAATTGGAATTTCTGGCCAGACAATGGGGCAGTGGCTGTGTTAAAGTACAATGGCATAATAACAGACACTATCAAGAGTTGGAGAAAC  
AATATATTGAGAACAACAAGAGTCTGAATGTGCATGTGTAATGGTTCCTTACTTACCATAATGACCGATGGACCAAGTGTGACAGGCCTCATAAAGATCTTCAGA  
ATAGAAAAGGGAAAGATAGTCAAATCAGTCGAAATGAATGCCCTAATTACTATGAGGAATGCTCCTGTTATCCTGATTCTAGTGAATCACATGTGTGTGCAGG  
GATAACTGGCATGGCTCGAATCGACCGTGGGTGTCTTTCAACCAGAATCTGGAATATCAGATAGGATACATATGCAGTGGGGTTTTCGGAGACAATCCACGCCCTA  
ATGATAAGACAGGCAGTTGTGGTCCAGTATCGTCTAATGGAGCAAATGGAGTAAAGGATTTTCATTCAAATACGGCAATGGTGTGGATAGGGAGAACTAAAAGC  
ATTAGTTCAAGAAAAGGTTTTGAGATGATTTGGGATCCGAATGGATGGACTGGGACAGACAATAACTTCTCAATAAAGCAAGATATCGTAGGAATAAAGAGTGGTC  
AGGATATAGCGGGAGTTTTGTTTCCAGCATCCAGAACTAACAGGGCTGGATTGTATAAGACCTTGCTTCTGGGTTGAACTAATCAGAGGGCGACCCGAAGAGAACACA  
ATCTGGACTAGCGGGAGCAGCATATCCTTTTGTGGTGTAAACAGTGACACTGTGGGTTGGTCT

>HAP16\_0.0094876 | global\_haplotype frequency=0.009488

ATAATAACCATTGGTTCGGTCTGTATGACAATTGGAATGGCTAACTTAATATTACAAATTGGAAACATAATCTCAATATGGGTTAGCCACTCAATTCAACTTGGGAATC  
AAAGTCATATTGAAACATGCAATCAAAGCGTCATTACTTATGAAAACAACACTTGGGTAAATCAGACATATGTTAACATCAGCAACACCAACTTTGCTGCTGGACAGT  
CAGTGGTTCCTGTAATAGCGGGCAATTCCTCTCTCTGCCCTGTTAGTGGATGGGCTATATACAGTAAAGACAACAGTGTAAAGAATCGGTTCCAAGGGGGATGT  
GTTTGCATAAAGGGGACCATTTCATATCATGCTCCCCCTTGAATGCAGAACCTTCTTCTTACTCAAGGGGCCTTGCTAAATGACAAACATTCCAATGGAACCATTAA  
AGACAGGAGCCCATATCGAACCTAATGAGCTGTCCTATTGGTGAAGTTCCTCTCCA-  
AGATCGCAAGATTTGAGTCAGTCGCTTGGTCAGCAAGTGGTTCATGATGGCATCAATTGGCTAACAATTGGAATTTCTGGCCCAGACAATGGGGCAGTGGCTGT  
GTTAAAGTACAATGGCATAATAACAGACACTATCAAGAGTTGGAGAAACAATATATTGAGAACAAGAGTCTGAATGTGCATGTGTAATGGTTCTTGGCTTTACCAT  
AATGACCGATGGACCAAGTATGGACAGGCCTCATAAAGATCTTCAGAATAGAAAAGGGAAAGATAGTCAAATCAGTCGAAATGAATGCCCTAATTACTATG  
AGGAATGCTCCTGTTATCCTGATTCTAGTGAATCACATGTGTGTGCAGGGATAACTGGCATGGCTCGAATCGACCGTGGGTGTCTTTCAACCAGAATCTGGAATAT  
CAGATAGGATACATATGCAGTGGGGTTTTCGGAGACAATCCACGCCCTAATGATAAGACAGGCAGTTGTGGTCCAGTATCGTCTAATGGAGCAAATGGAGTAAAAG  
GATTTTCATTCAAATACGGCAATGGTGTGGATAGGGAGAATAAAAGCATTAGTTCAAGAAAAGGTTTTGAGATGATTTGGGATCCGAATGGATGGACTGGGACA  
GACAATAACTTCTCAATAAAGCAAGATATCGTAGGAATAAAAGAGTGGTCAGGATATAGCGGGAGTTTTGTTTCAGCATCCAGAATAACAGGGCTGGATTGTATAAG  
ACCTTGCTTCTGGGTTGAACTAATCAGAGGGCGACCCGAAGAGAACAATCTGGACTAGCGGGAGCAGCATATCCTTTTGTGGTGTAACAGTGACACTGTGGGT  
TGGTCT

>HAP17\_0.00860184 | global\_haplotype frequency=0.008602

ATAATAACCATTGGTTCGGTCTGTATGACAATTGGAATGGCTAACTTAATATTACAAATTGGAAACATAATCTCAATATGGGTTAGCCACTCAATTCAACTTGGGAATC  
AAAGTCATATTGAAACATGCAATCAAAGCGTCATTACTTATGAAAACAACACTTGGGTAAATCAGACATATGTTAACATCAGCAACACCAACTTTGCTGCTGGACAGT  
CAGTGGTTCCTGTAATAGCGGGCAATTCCTCTCTCTGCCCTGTTAGTGGATGGGCTATATACAGTAAAGACAACAGTGTAAAGAATCGGTTCCAAGGGGGATGT  
GTTTGCATAAAGGGAACCATTTCATATCATGCTCCCCCTTGAATGCAGAACCTTCTTCTTACTCAAGGGGCCTTGCTAAATGACAAACATTCCAATGGAACCATTAA  
AGACAGGAGCCCATATCGAACCTAATGAGCTGTCCTATTGGTGAAGTTCCTCTCCATACAACTCAAGATTTGAGTCAGTCGCTTGGTCAGCAAGTGGCTTGTGATG  
ATGGCATCAATTGGCTAACAATTGGAATTTCTGGCCCAGACAATGGGGCAGTGGCTGTGTTAAAGTACAATGGCATAATAACAGACACTATCAAGAGTTGGAGAAAC  
AATATATTGAGAACAAGAGTCTGAATGTGCATGTGTAATGGTTCTTGGCTTTACCATAATGACCGATGGACCAAGTATGGACAGGCCTCATAAAGATCTTCAGA  
ATAGAAAAGGGAAAGATAGTCAAATCAGTCGAAATGAATGCCCTAATTACTATGAGGAATGTCCTGTTATCCTGATTCTAGTGAATCACATGTGTGTGCAGG  
GATAACTGGCATGGCTCGAATCGACCGTGGGTGTCTTTCAACCAGAATCTGGAATATCAGATAGGATACATATGCAGTGGGGTTTTCGGAGACAATCCACGCCCTA  
ATGATAAGACAGGCAGTTGTGGTCCAGTATCGTCTAATGGAGCAAATGGAGTAAAAGGATTTTCATTCAAATACGGCAATGGTGTGGATAGGGAGAATAAAAGC  
ATTAGTTCAAGAAAAGGTTTTGAGATGATTTGGGATCCGAATGGATGGACTGGGACAGACAATAACTTCTCAATAAAGCAAGATATCGTAGGAATAAAAGAGTGGT  
AGGATATAGCGGGAGTTTTGTTTCAGCATCCAGAATAACAGGGCTGGATTGTATAAGACCTTGCTTCTGGGTTGAACTAATCAGAGGGCGACCCGAAGAGAACA-  
GATCGGAAGTAGCGGGAGCAGCATATCCTTTTGTGGTGTAACAGTGACACTGTGGGTTGGTCT

>HAP18\_0.00855827 | global\_haplotype frequency=0.008558

ATAATAACCATTGGTTCGGTCTGTATGACAATTGGAATGGCTAACTTAATATTACAAATTGGAAACATAATCTCAATATGGGTTAGCCACTCAATTCAACTTGGGAATC  
AAAGTCATATTGAAACATGCAATCAAAGCGTCATTACTTATGAAAACAACACTTGGGTAAATCAGACATATGTTAACATCAGCAACACCAACTTTGCTGCTGGACAGT  
CAGTGGTTCCTGTAATTAGCGGGCAATTCCTCTCTCTGCCCTGTTAGTGGATGGGCTATATACAGTAAAGACAACAGTGTAAAGAGACGGTTCGAAGGGGGATGT  
GTTTGTGATAAGGGACCCATTCATATCATGCTCCCCCTTGAATGCAGAACCTTCTTCTTGAAGTCAAGGGGCCTTGCTAAATGACAAACATTCCAATGGAACCATTAA  
AGACAGGAGCCCATATCGAACCTAATGAGCTGTCTATTGGTGAAGTTCCTCTCCATACAACTCAAGATTTGAGTCAGTCGCTTGGTCAGCAAGTGCTTGTGATG  
ATGGCATCAATTGGCTAACAATTGGAATTTCTGGCCAGACAATGGGGCAGTGGCTGTGTTAAAGTACAATGGCATAATAACAGACACTATCAAGAGTTGGAGAAAC  
AATATATTGAGAACACAAGAGTCTGAATGTGCATGTGTAATGGTTCCTTACCATAATGACCGATGGACCAAGTGATGGACAGGCCTCATAACAAGATCTTCAGA  
ATAGAAAAGGGAAAGATAGTCAAATCAGTCGAAATGAATGCCCTAATTATTACTATGAGGAATGCTCCTGTTATCCTGATTCTAGTGAATCACATGTGTGTGCAGG  
GATAACTGGCATGGCTCGAATCGACCGTGGGTGTCTTTCAACCAGAATCTGGAATATCAGATAGGATACATATGCAGTGGGGTTTTTCGGAGACAATCCACGCCCTA  
ATGATAAGACAGGCAGTTGTGGTCCAGTATCGTCTAATGGAGCAAATGGAGTAAAGGATTTTCATTCAAATACGGCAATGGTGTGGATAGGGGAGAACTAAAAGC  
ATTAGTTCAAGAAAAGGTTTTGAGATGATTTGGGATCCGAATGGATGGACTGGGACAGACAATAACTTCTCAATAAAGCAAGATATCGTAGGAATAAAGAGTGGTC  
AGGATATAGCGGGAGTTTTGTTGAGCATCCAGAACTAACAGGGCTGGATTGTATAAGACCTTGCTTCTGGGTTGAACTAATCAGAGGGCGACCCGAAGAGAACACA  
ATCTGGACTAGCGGGAGCAGCATATCCTTTTGTGGTGTAACAGTGACACTGTGGGTTGGTCT

>HAP19\_0.00826012 | global\_haplotype frequency=0.008260

ATAATAACCATTGGTTCGGTCTGTATGACAATTGGAATGGCTAACTTAATATTACAAATTGGAAACATAATCTCAATATGGGTTAGCCACTCAATTCAACTTGGGAATC  
AAAGTCATATTGAAACATGCAATCAAAGCGTCATTACTTATGAAAACAACACTTGGGTAAATCAGACATATGTTAACATCAGCAACACCAACTTTGCTGCTGGACAGT  
CAGTGGTTCCTGTAATTAGCGGGCAATTCCTCTCTCTGCCCTGTTAGTGGATGGGCTATATACAGTAAAGACAACAGTGTAAAGTCCGTTCCAAGGGGGATGT  
GTTTGTGATAAGGGACCCATTCATATCATGCTCCCCCTTGAATGCAGAACCTTCTTCTTGAAGTCAAGGGGCCTTGCTAAATGACAAACATTCCAATGGAACCATTAA  
AGACAGGAGCCCATATCGAACCTAATGAGCTGTCTATTGGTGAAGTTCCTCTCCATACAACTCAAGATTTGAGTCAGTCGCTTGGTCAGCAAGTGCTTGTGATG  
ATGGCATCAATTGGCTAACAATTGGAATTTCTGGCCAGACAATGGGGCAGTGGCTGTGTTAAAGTACAATGGCATAATAACAGACACTATCAAGAGTTGGAGAAAC  
AATATATTGAGAACACAAGAGTCTGAATGTGCATGTGTAATGGTTCCTTACCATAATGACCGATGGACCAAGTGATGGACAGGCCTCATAACAAGATCTTCAGA  
ATAGAAAAGGGAAAGATAGTCAAATCAGTCGAAATGAATGCCCTAATTATTACTATGAGGAATGCTCCTGTTATCCTGATTCTAGTGAATCACATGTGTGTGCAGG  
GATAACTGGCA--  
GATCGGAACGACCGTGGGTGTCTTTCAACCAGAATCTGGAATATCAGATAGGATACATATGCAGTGGGGTTTTTCGGAGACAATCCACGCCCTAATGATAAGACAGG  
CAGTTGTGGTCCAGTATCGTCTAATGGAGCAAATGGAGTAAAGGATTTTCATTCAAATACGGCAATGGTGTGGATAGGGGAGAACTAAAAGCATTAGTTCAAGAA  
AAGGTTTTGAGATGATTTGGGATCCGAATGGATGGACTGGGACAGACAATAACTTCTCAATAAAGCAAGATATCGTAGGAATAAAGAGTGGTCAGGATATAGCGGG  
AGTTTTGTTGAGCATCCAGAACTAACAGGGCTGGATTGTATAAGACCTTGCTTCTGGGTTGAACTAATCAGAGGGCGACCCGAAGAGAACACAATCTGGACTAGCG  
GGAGCAGCATATCCTTTTGTGGTGTAACAGTGACACTGTGGGTTGGTCT

>HAP20\_0.00809579 | global\_haplotype frequency=0.008096

ATAATAACCATTGGTTCGGTCTGTATGACAATTGGAATGGCTAACTTAATATTACAAATTGGAAACATAATCTCAATATGGGTTAGCCACTCAATTCAACTTGGGAATC  
AAAGTCATATTGAAACATGCAATCAAAGCGTCATTACTTATGAAAACAACACTTGGGTAAATCAGACATATGTTAACATCAGCAACACCAACTTTGCTGCTGGACAGT  
CAGTGGTTCCTGTAATAGCGGGCAATTCCTCTCTCTGCCCTGTTAGTGGATGGGCTATATACAGTAAAGACAACAGTGTAAAGAATCGGTTCCAAGGGGGATGT  
GTTTGTGCGGAAGAGCACACGTCATATCATGCTCCCCCTTGAATGCAGAACCTTCTTCTTACTCAAGGGGCCTTGCTAAATGACAAACATTCCAATGGAACCATTA  
AAGACAGGAGCCCATATCGAACCTAATGAGCTGTCTATTGGTGAAGTTCCTCTCCATACAACTCAAGATTTGAGTCAGTCGCTTGGTCAGCAAGTGCTTGTGCAT  
GATGGCATCAATTGGCTAACAATTGGAATTTCTGGCCCAGACAATGGGGCAGTGGCTGTGTTAAAGTACAATGGCATAATAACAGACACTATCAAGAGTTGGAGAAA  
CAATATATTGAGAACAACAAGAGTCTGAATGTGCATGTGTAATGGTTCCTTACCATAATGACCGATGGACCAAGTGTGGACAGGCCTCATAACAAGATCTTCAG  
AATAGAAAAGGGAAAGATAGTCAAATCAGTCGAAATGAATGCCCTAATTACTATGAGGAATGCTCCTGTTATCCTGATTCTAGTGAATCACATGTGTGTGCAG  
GGATAACTGGCATGGCTCGAATCGACCGTGGGTGTCTTTCAACCAGAATCTGGAATATCAGATAGGATACATATGCAGTGGGGTTTTTCGGAGACAATCCACGCCCT  
AATGATAAGACAGGCAGTTGTGGTCCAGTATCGTCTAATGGAGCAAATGGAGTAAAAGGATTTTCATTCAAATACGGCAATGGTGTGGATAGGGGAGAACTAAAAG  
CATTAGTTCAAGAAAAGTTTTGAGATGATTTGGGATCCGAATGGATGGACTGGGACAGACAATAACTTCTCAATAAAGCAAGATATCGTAGGAATAAAGAGTGGT  
CAGGATATAGCGGGAGTTTTGTTTCAGCATCCAGAATAACAGGGCTGGATTGTATAAGACCTTGCTTCTGGGTTGAACTAATCAGAGGGCGACCCGAAGAGAACAC  
AATCTGGACTAGCGGGAGCAGCATATCCTTTTGTGGTGTAAACAGTGACACTGTGGGTTGGTCT

>HAP21\_0.00808712 | global\_haplotype frequency=0.008087

ATAATAACCATTGGTTCGGTCTGTATGACAATTGGAATGGCTAACTTAATATTACAAATTGGAAACATAATCTCAATATGGGTTAGCCACTCAATTCAACTTGGGAATC  
AAAGTCATATTGAAACATGCAATCAAAGCGTCATTACTTATGAAAACAACACTTGGGTAAATCAGACATATGTTAACATCAGCAACACCAACTTTGCTGCTGGACAGT  
CAGTGGTTCCTGTAATAGCGGGCAATTCCTCTCTCTGCCCTGTTAGTGGATGGGCTATATACAGTAAAGACAACAGTGTAAAGAATCGGTTCCAAGGGGGATGT  
GTTTGTGATAAGGGACCCATTCATATCATGCTCCAGCTTGAATGCAGAACCTTCTTCTTACTCAAGGGGCCTTGCTAAATGACAAACATTCCAATGGAACCATTAA  
AGACAGGAGCCCATATCGAACCTAATGAGCTGTCTATTGGTGAAGTTCCTCTCCATACAACTCAAGATTTGAGTCAGTCGCTTGGTCAGCAAGTGCTTGTGCATG  
ATGGCATCAATTGGCTAACAATTGGAATTTCTGGCCCAGACAATGGGGCAGTGGCTGTGTTAAAG-  
AGATCGGAAGAGCACCAGACACTATCAAGAGTTGGAGAAACAATATATTGAGAACAACAAGAGTCTGAATGTGCATGTGTAATGGTTCCTTACCATAATGACC  
GATGGACCAAGTGTGGACAGGCCTCATAACAAGATCTTCAGAATAGAAAAGGGAAAGATAGTCAAATCAGTCGAAATGAATGCCCTAATTACTATGAGGAATG  
CTCCTGTTATCCTGATTCTAGTGAATCACATGTGTGTGCAGGGATAACTGGCATGGCTCGAATCGACCGTGGGTGTCTTTCAACCAGAATCTGGAATATCAGATAG  
GATACATATGCAGTGGGGTTTTTCGGAGACAATCCACGCCCTAATGATAAGACAGGCAGTTGTGGTCCAGTATCGTCTAATGGAGCAAATGGAGTAAAAGGATTTTCA  
TTCAAATACGGCAATGGTGTGGATAGGGGAGAACTAAAAGCATTAGTTCAAGAAAAGTTTTGAGATGATTTGGGATCCGAATGGATGGACTGGGACAGACAATAA  
CTTCTCAATAAAGCAAGATATCGTAGGAATAAAGAGTGGTCAGGATATAGCGGGAGTTTTGTTTCAGCATCCAGAATAACAGGGCTGGATTGTATAAGACCTTGCT  
TCTGGGTTGAACTAATCAGAGGGCGACCCGAAGAGAACAATCTGGACTAGCGGGAGCAGCATATCCTTTTGTGGTGTAAACAGTGACACTGTGGGTTGGTCT

>HAP22\_0.00788851 | global\_haplotype frequency=0.007889

ATAATAACCATTGGTTCGGTCTGTATGACAATTGGAATGGCTAACTTAATATTACAAATTGGAAACATAATCTCAATATGGGTTAGCCACTCAATTCAACTTGGGAATC  
AAAGTCATATTGAAACATGCAATCAAAGCGTCATTACTTATGAAAACAACACTTGGGTAAATCAGACATATGTTAACATCAGCAACACCAACTTTGCTGCTGGACAGT  
CAGTGGTTCCTGTAATAGCGGGCAATTCCTCTCTCTGCCCTGTTAGTGGATGGGCTATATACAGTAAAGACAACAGTGTAAAGAATCGGTTCCAAGGGGGATGT  
GTTTGTGATAAGGGACCCATTCATATCATGCTCCCCCTTGAATGCAGAACCTTCTTCTTGAATCAAGGGGCCTTGCTAAATGACAAACATTCCAATGGAACCATTAA  
AGACAGGAGCCCATATCGAACCTAATGAGCTGTCCTATTGGTGAAGTTCCTCTCCATACAACTCAAGATTTGAGTCAGTCGCTTGGTCAGCAAGTGTCTTGTGATG  
ATGGCATCAATTGGCTAACAATTGGAATTTCTGGCCCAGACAATGGGGCAGTGGCTGTGTTAAAGTACAATGGCATAATAACAGACACTATCAAGAGTTGGAGAAAC  
AATATATTGAGAACAAGAGTCTGAATGTGCATGTGTAATGGTTCTTGCTTACCATAATGACCGATGGACCAAGTGATGGACAGGCCTCATACAAGATCTTCAGA  
ATAGAAAAGGGAAAGATAGT-  
AGATCGGTGCAAAATGAATGCCCCTAATTATTACTATGAGGAATGCTCCTGTTATCCTGATTCTAGTGAATCACATGTGTGTGCAGGGATAACTGGCATGGCTCGAA  
TCGACCGTGGGTGTCTTTCAACCAGAATCTGGAATATCAGATAGGATACATATGCAGTGGGGTTTTTCGGAGACAATCCACGCCCTAATGATAAGACAGGCAGTTGT  
GGTCCAGTATCGTCTAATGGAGCAAATGGAGTAAAAGGATTTTCATTCAAATACGGCAATGGTGTGGATAGGGAGAACTAAAAGCATTAGTTCAAGAAAAGGTTTT  
GAGATGATTTGGGATCCGAATGGATGGACTGGGACAGACAATAACTTCTCAATAAAGCAAGATATCGTAGGAATAAAGAGTGGTCAGGATATAGCGGGAGTTTTGT  
TCAGCATCCAGAACTAACAGGGCTGGATTGTATAAGACCTTGCTTCTGGGTTGAACTAATCAGAGGGCGACCCGAAGAGAACACAATCTGGACTAGCGGGAGCAGC  
ATATCCTTTTGTGGTGTAAACAGTGACACTGTGGGTTGGTCT

>HAP23\_0.00767959 | global\_haplotype frequency=0.007680

ATAATAACCATTGGTTCGGTCTGTATGACAATTGGAATGGCTAACTTAATATTACAAATTGGAAACATAATCTCAATATGGGTTAGCCACTCAATTCAACTTGGGAATC  
AAAGTCATATTGAAACATGCAATCAAAGCGTCATTACTTATGAAAACAACACTTGGGTAAATCAGACATATGTTAACATCAGCAACACCAACTTTGCTGCTGGACAGT  
CAGTGGTTCCTGTAATAGCGGGCAATTCCTCTCTCTGCCCTGTTAGTGGATGGGCTATATACAGTAAAGACAACAGTGTAAAGAATCGGTTCCAAGAGCGATGT  
GTTTGTGATAAGGGACCCATTCATATCATGCTCCCCCTTGAATGCAGAACCTTCTTCTTGAATCAAGGGGCCTTGCTAAATGACAAACATTCCAATGGAACCATTAA  
AGACAGGAGCCCATATCGAACCTAATGAGCTGTCCTATTGGTGAAGTTCCTCTCCATACAACTCAAGATTTGAGTCAGTCGCTTGGTCAGCAAGTGTCTTGTGATG  
ATGGCATCAATTGGCTAACAATTGGAATTTCTGGCCCAGACAATGGGGCAGTGGCTGTGTTAAAG-  
AGATCGGAAGAGCACCAGACACTATCAAGAGTTGGAGAAACAATATATTGAGAACACAAGAGTCTGAATGTGCATGTGTAATGGTTCTTGCTTACCATAATGACC  
GATGGACCAAGTGATGGACAGGCCTCATACAAGATCTTCAAGATAGAAAAGGGAAAGATAGTCAAATCAGTCGAAATGAATGCCCCTAATTATTACTATGAGGAATG  
CTCCTGTTATCCTGATTCTAGTGAATCACATGTGTGTGCAGGGATAACTGGCATGGCTCGAATCGACCGTGGGTGTCTTTCAACCAGAATCTGGAATATCAGATAG  
GATACATATGCAGTGGGGTTTTTCGGAGACAATCCACGCCCTAATGATAAGACAGGCAGTTGTGGTCCAGTATCGTCTAATGGAGCAAATGGAGTAAAAGGATTTTCA  
TTCAAATACGGCAATGGTGTGGATAGGGAGAACTAAAAGCATTAGTTCAAGAAAAGGTTTTGAGATGATTTGGGATCCGAATGGATGGACTGGGACAGACAATAA  
CTTCTCAATAAAGCAAGATATCGTAGGAATAAAGAGTGGTCAGGATATAGCGGGAGTTTTGTTACAGCATCCAGAACTAACAGGGCTGGATTGTATAAGACCTTGCT  
TCTGGGTTGAACTAATCAGAGGGCGACCCGAAGAGAACACAATCTGGACTAGCGGGAGCAGCATATCCTTTTGTGGTGTAAACAGTGACACTGTGGGTTGGTCT

>HAP24\_0.00756116 | global\_haplotype frequency=0.007561

ATAATAACCATTGGTTCCGGTCTGTATGACAATTGGAATGGCTAACTTAATATTACAAATTGAAACATAATCTCAATATGGGTTAGCCACTCAATTCAACTTGGGAATC  
AAAGTCATATTGAAACATGCAATCAAAGCGTCATTACTTATGAAAACAACACTTGGGTAAATCAGACATATGTTAACATCAGCAACACCAACTTTGCTGCTGGACAGT  
CAGTGGTTCCCGTCAAATTAGCGGGCAATTCCTCTCTCTGCCCTGTTAGTGGATGGGCTATATACAGTAAAGACAACAGTGTAAAGAATCGGTTCCAAGGGGGATGT  
GTTTGTGATAAGGGGACCATTTCATATCATGCTCCCCCTTGAATGCAGAACCTTCTTCTTGAAGTCAAGGGGCCTTGCTAAATGACAAACATTCCAATGGAACCATTAA  
AGACAGGAGCCCATATCGAACCCTAATGAGCTGTCTATTGGTGAAGTTCCTCTCCATACAACACTCAAGATTTGAGTCAGTCGCTTGGTCAGCAAGTGGTGTGTCATG  
ATGGCATCAATTGGCTAACAATTGGAATTTCTGGCCAGACAATGAGATCGTGGCTGTGTTAAAGTACAATGGCATAATAACAGACACTATCAAGAGTTGGAGAAAC  
AATATATTGAGAACAAGAGTCTGAATGTGCATGTGTAATGGTTCCTTACCATAATGACCGATGGACCAAGTGGTGTGACAGGCCTCATAAAGATCTTCAGA  
ATAGAAAAGGGAAAGATAGTCAAATCAGTCGAAATGAATGCCCTAATTACTATGAGGAATGCTCCTGTTATCCTGATTCTAGTGAATCAGTGTGTGTGCAGG  
GATAACTGGCATGGCTCGAATCGACCGTGGGTGTCTTTCAACCAGAATCTGGAATATCAGATAGGATACATATGCAGTGGGGTTTTCGGAGACAATCCACGCCCTA  
ATGATAAGACAGGCAGTTGTGGTCCAGTATCGTCTAATGGAGCAAATGGAGTAAAGGATTTTCATTCAAATACGGAAGTGGTGTGGTGGATAGGGAGAACTAAAAGC  
ATTAGTTCAAGAAAAGGTTTTGAGATGATTTGGGATCCGAATGGATGGACTGGGACAGACAATAACTTCTCAATAAAGCAAGATATCGTAGGAATAAAGAGTGGTC  
AGGATATAGCGGGAGTTTTGTTTCCAGCATCCAGAACTAACAGGGCTGGATTGTATAAGACCTTGCTTCTGGGTTGAACTAATCAGAGGGCGACCCGAAGAGAACACA  
ATCTGGACTAGCGGGAGCAGCATATCCTTTTGTGGTGTAAACAGTGACACTGTGGGTTGGTCT

>HAP25\_0.00728503 | global\_haplotype frequency=0.007285

ATAATAACCATTGGTTCCGGTCTGTATGACAATTGGAATGGCTAACTTAATATTACAAATTGAAACATAATCTCAATATGGGTTAGCCACTCAATTCAACTTGGGAATC  
AAAGTCATATTGAAACATGCAATCAAAGCGTCATTACTTATGAAAACAACACTTGGGTAAATCAGACATATGTTAACATCAGCAACACCAACTTTGCTGCTGGACAGT  
CAGTGGTTCCCGTCAAATTAGCGGGCAATTCCTCTCTCTGCCCTGTTAGCGGAAGAGCAATATACAGTAAAGACAACAGTGTAAAGAATCGGTTCCAAGGGGGATGT  
GTTTGTGATAAGGGACCCATTTCATATCATGCTCCCCCTTGAATGCAGAACCTTCTTCTTGAAGTCAAGGGGCCTTGCTAAATGACAAACATTCCAATGGAACCATTAA  
AGACAGGAGCCCATATCGAACCCTAATGAGCTGTCTATTGGTGAAGTTCCTCTCCATACAACACTCAAGATTTGAGTCAGTCGCTTGGTCAGCAAGTGGTGTGTCATG  
ATGGCATCAATTGGCTAACAATTGGAATTTCTGGCCAGACAATGGGGCAGTGGCTGTGTTAAAGTACAATGGCATAATAACAGACACTATCAAGAGTTGGAGAAAC  
AATATATTGAGAACAAGAGTCTGAATGTGCATGTGTAATGGTTCCTTACCATAATGACCGATGGACCAAGTGGTGTGACAGGCCTCATAAAGATCTTCAGA  
ATAGAAAAGGGAAAGATAGTCAAATCAGTCGAAATGAATGCCCTAATTACTATGAGGAATGCTCCTGTTATCCTGATTCTAGTGAATCAGTGTGTGTGCAGG  
GATAACTGGCATGGCTCGAATCGACCGTGGGTGTCTTTCAACCAGAATCTGGAATATCAGATAGGATACATATGCAGTGGGGTTTTCGGAGACAATCCACGCCCTA  
ATGATAAGACAGGCAGTTGTGGTCCAGTATCGTCTAATGGAGCAAATGGAGTAAAGGATTTTCATTCAAATACGGAAGTGGTGTGGTGGATAGGGAGAACTAAAAGC  
ATTAGTTCAAGAAAAGGTTTTGAGATGATTTGGGATCCGAATGGATGGACTGGGACAGACAATAACTTCTCAATAAAGCAAGATATCGTAGGAATAAAGAGTGGTC  
AGGATATAGCGGGAGTTTTGTTTCCAGCATCCAGAACTAACAGGGCTGGATTGTATAAGACCTTGCTTCTGGGTTGAACTAATCAGAGGGCGACCCGAAGAGAACACA  
ATCTGGACTAGCGGGAGCAGCATATCCTTTTGTGGTGTAAACAGTGACACTGTGGGTTGGTCT

>HAP26\_0.0072304 | global\_haplotype frequency=0.007230

ATAATAACCATTGGTTCGGTCTGTATGACAATTGGAATGGCTAACTTAATATTACAAATTGGAAACATAATCTCAATATGGGTTAGCCACTCAATTCAACTTGGGAATC  
AAAGTCATATTGAAACATGCAATCAAAGCGTCATTACTTATGAAAACAACACTTGGGTAAATCAGACATATGTTAACATCAGCAACACCAACTTTGCTGCTGGACAGT  
CAGTGGTTCCTCGTAAATTAGCGGGCAATTCCTCTCTCTGCCCTGTTAGTGGATGGGCTATATACAGTAAAGACAACAGTGTAAAGAATCGGTTCCAAGGGGGATGT  
GTTTGTGATAAAGGGGCCATTTCATATCATGCTCCCCCTTGAATGCAGAACCTTCTTCTTACTCAAGGGGCCTTGCTAAATGACAAACATTCCAATGGAACCATTAA  
AGACAGGAGCCCATATCGAACCCTAATGAGCTGTCCTATTGGTGAAGTTCCTCTCCATACAACTCAAGATTTGAGTCAGTCGCTTGGTCAGCAAGTGGCTTGTGTCATG  
ATGGCATCAATTGGCTAACAATTGGAATTTCTGGCCAGACAATGGGGCAGTGGCTGTGTTAAAGTACAATGGCATAATAACAGACACTATCAAGAGTTGGAGAAAC  
AATATATTGAGAACACAAGAGTCTGAATGTGCATGTGTAATGGTTCTTGGCTTACCATAATGACCGATGGACCAAGTGTGGACAGGCCTCATAACAAGATCTTCAGA  
ATAGAAAAGGGAAAGATAGTCAAATCAGTCGAAATGAATGCCCTAATTACTATGAGGAATGCTCCTGTTATCCTGATTCTAGTAAATCACATGTGTGTGCAGG  
GATAACTGGCATGGCTCGAATCGACCGTGGGTGTCTTTCAACCAGAATCTGGAATATCAGATAGGATACATATGCAGTGGGGTTTTCCGAGACAATCCACGCCCTA  
ATGATAAGACAGGCAGTTGTGGTCCAGTATCGTCTAATGGAGCAAATGGAGTAAAGGATTTTCATTCAAATACGGCAATGGTGTGGATAGGGGAGAACTAAAAGC  
ATTAGTTCAAGAAAAGGTTTTGAGATGATTTGGGATCCGAATGGATGGACTGGGACAGACAATAACTTCTCAATAAAGCAAGATATCGTAGGAATAAAAGAGTGGTC  
AGGATATAGCGGGAGTTTTGTTTCAGCATCCAGAACTAACAGGGCTGGATTGTATAAGACCTTGCTTCTGGGTTGAACTAATCAGAGGGCGACCCGAAGAGAACACA  
ATTCGGAAGAGCACAAAGCAGCATATCCTTTTGTGGTGTAAACAGTGACACTGTGGGTTGGTCT

>HAP27\_0.00711886 | global\_haplotype frequency=0.007119

ATAATAACCATTGGTTCGGTCTGTATGACAATTGGAATGGCTAACTTAATATTACAAATTGGAAACATAATCTCAATATGGGTTAGCCACTCAATTCAACTTGGGAATC  
AAAGTCATATTGAAACATGCAATCAAAGCGTCATTACTTATGAAAACAACACTTGGGTAAATCAGACATATGTTAACATCAGCAACACCAACTTTGCTGCTGGACAGT  
CAGTGGTTCCTCGATCGTAGCGGGCAATTCCTCTCTCTGCCCTGTTAGTGGATGGGCTATATACAGTAAAGACAACAGTGTAAAGAATCGGTTCCAAGGGGGATGT  
GTTTGTGATAAAGGGACCCATTTCATATCATGCTCCCCCTTGAATGCAGAACCTTCTTCTTACTCAAGGGGCCTTGCTAAATGACAAACATTCCAATGGAACCATTAA  
AGACAGGAGCCCATATCGAACCCTAATGAGCTGTCCTATTGGTGAAGTTCCTCTCCATACAACTCAAGATTTGAGTCAGTCGCTTGGTCAGCAAGTGGCTTGTGTCATG  
ATGGCATCAATTGGCTAACAATTGGAATTTCTGGCCAGACAATGGGGCAGTGGCTGTGTTAAAGTACAATGGCATAATAACAGACACTATCAAGAGTTGGAGAAAC  
AATATATTGAGAACACAAGAGTCTGAATGTGCATGTGTAATGGTTCTTGGCTTACCATAATGACCGATGGACCAAGTGTGGACAGGCCTCATAACAAGATCTTCAGA  
ATAGAAAAGGGAAAGATAGTCAAATCAGTCGAAATGAATGCCCTAATTACTATGAGGAATGCTCCTGTTATCCTGATTCTAGTAAATCACATGTGTGTGCAGG  
GATAACTGGCATGGCTCGAATCGACCGTGGGTGTCTTTCAACCAGAATCTGGAATATCAGATAGGATACATATGCAGTGGGGTTTTCCGAGACAATCCACGCCCTA  
ATGATAAGACAGGCAGTTGTGGTCCAGTATCGTCTAATGGAGCAAATGGAGTAAAGGATTTTCATTCAAATACGGCAATGGTGTGGATAGGGGAGAACTAAAAGC  
ATTAGTTCAAGAAAAGGTTTTGAGATGATTTGGGATCCGAATGGATGGACTGGGACAGACAATAACTTCTCAATAAAGCAAGATATCGTAGGAATAAAAGAGTGGTC  
AGGATATAGCGGGAGTTTTGTTTCAGCATCCAGAACTAACAGGGCTGGATTGTATAAGACCTTGCTTCTGGGTTGAACTAATCAGAGGGCGACCCGAAGAGAACACA  
ATCTGGACTAGCGGGAGCAGCATATCCTTTTGTGGTGTAAACAGTGACACTGTGGGTTGGTCT

>HAP28\_0.00702849 | global\_haplotype frequency=0.007028

ATAATAACCATTGGTTCGGTCTGTATGACAATTGGAATGGCTAACTTAATATTACAAATTGGAAACATAATCTCAATATGGGTTAGCCACTCAATTCAACTTGGGAATC  
AAAGTCATATTGAAACATGCAATCAAAGCGTCATTACTTATGAAAACAACACTTGGGTAAATCAGACATATGTTAACATCAGCAACACCAACTTTGCTGCTGGACAGT  
CAGTGGTTCCTGTAATAGCGGGCAATTCCTCTCTCTGCCCTGTTAGTGGATGGGCTATATACAGTAAAGACAACAGTGTAAAGAATCGGTTCCAAGGGGGATGT  
GTTTGTGATAAGGGACCCATTCATATCATGCTCCCCCTTGAATGCAGAACCTTCTTCTTGAAGTCAAGGGGCCTTGCTAAATGACAAACATTCCAATGGAACCATTAA  
AGACAGGAGCCCATATCGAACCCTAATGAGCTGTCCTATTGGTGAAGTCCCCTCTCCATACAACACTCAAGATTTGAGTCAGTCGCTTGGTCAGCAAGTGCTTGTGATG  
ATGGCATCAATTGGCTAACAATTGGAATTTCTAGATCGGAAGATGGGGCAGTGGCTGTGTTAAAGTACAATGGCATAATAACAGACACTATCAAGAGTTGGAGAAAC  
AATATATTGAGAACACAAGAGTCTGAATGTGCATGTGTAATGGTTCTTGGCTTACCATAATGACCGATGGACCAAGTGATGGACAGGCCTCATAACAAGATCTTCAGA  
ATAGAAAAGGGAAAGATAGTCAAATCAGTCGAAATGAATGCCCTAATTACTATGAGGAATGCTCCTGTTATCCTGATTCTAGTGAAATCACATGTGTGTGCAGG  
GATAACTGGCATGGCTCGAATCGACCGTGGGTGTCTTTCAACCAGAATCTGGAATATCAGATAGGATACATATGCAGTGGGGTTTTCCGAGACAATCCACGCCCTA  
ATGATAAGACAGGCAGTTGTGGTCCAGTATCGTCTAATGGAGCAAATGGAGTAAAGGATTTTCATTCAAATACGGCAATGGTGTGGATAGGGGAGAACTAAAAGC  
ATTAGTTCAAGAAAAGGTTTTGAGATGATTTGGGATCCGAATGGATGGACTGGGACAGACAATAACTTCTCAATAAAGCAAGATATCGTAGGAATAAAAGAGTGGTC  
AGGATATAGCGGGAGTTTTGTTGAGCATCCAGAACTAACAGGGCTGGATTGTATAAGACCTTGCTTCTGGGTTGAACTAATCAGAGGGCGACCCGAAGAGAACACA  
ATCTGGACTAGCGGGAGCAGCATATCCTTTTGTGGTGTAAACAGTGACACTGTGGGTTGGTCT

>HAP29\_0.0069483 | global\_haplotype frequency=0.006948

ATAATAACCATTGGTTCGGTCTGTATGACAATTGGAATGGCTAACTTAATATTACAAATTGGAAACATAATCTCAATATGGGTTAGCCACTCAATTCAACTTGGGAATC  
AAAGTCATATTGAAACATGCAATCAAAGCGTCATTACTTATGAAAACAACACTTGGGTAAATCAGACATATGTTAACATCAGCAACACCAACTTTGCTGCTGGACAGT  
CAGTGGTTCCTGTAATAGCGGGCAATTCCTCTCTCTGCCCTGTTAGTGGATGGGCTATATACAGTAAAGACAACAGTGTAAAGAATCGGTTCCAAGGGGGATGT  
GTTTGTGATAAGGGAAACCATTCATATCATGCTCCCCCTTGAATGCAGAACCTTCTTCTTGAAGTCAAGGGGCCTTGCTAAATGACAAACATTCCAATGGAACCATTAA  
AGACAGGAGCCCATATCGAACCCTAATGAGCTGTCCTATTGGTGAAGTTCCTCTCCATACAACACTCAAGATTTGAGTCAGTCGCTTGGTCAGCAAGTGCTTGTGATG  
ATGGCATCAATTGGCTAACAATTGGAATTTCTGGCCAGACAATGGGGCAGTGGCTGTGTTAAAGTACAATGGCATAATAACAGACACTATCAAGAGTTGGAGAAAC  
AATATATTGAGAACACAAGAGTCTGAATGTGCATGTGTAATGGTTCTTGGCTTACCATAATGACCGATGGACCAAGTGATGGACAGGCCTCATAACAAGATCTTCAGA  
ATAGAAAAGGGAAAGATAGTCAAATCAGTCGAAATGAATGCCCTAATTACTATGAGGAATGCTCCTGTTATCCTGATTCTAGTGAAATCACATGTGTGTGCAGG  
GATAACTGGCATGGCTCGAATCGACCGTGGGTGTCTTTCAACCAGAATCTGGAATATCAGATAGGATACATATGCAGTGGGGTTTTCCGAGACAATCCACGCCCTA  
ATGATAAGACAGGCAGTTGTGGTCCAGTATCGTCTAATGGAGCAAATGGAGTAAAGGATTTTCATTCAAATACGGCAATGGTGTGGATAGGGGAGAACTAAAAGC  
ATTAGTTCAAGAAAAGGTTTTGAGATGATTTGGGATCCGAATGGATGGACTGGGACAGACAATAACTTCTCAATAAAGCAAGATATCGTAGGAATAAAAGAGTGGTC  
AGGATATAGCGGGAGTTTTGTTGAGCATCCAGAACTAACAGGGCTGGATTGTATAAGACCTTGCTTCTGGGTTGAACTAATCAGAGGAAGAGACGAAGAGAACACA  
ATCTGGACTAGCGGGAGCAGCATATCCTTTTGTGGTGTAAACAGTGACACTGTGGGTTGGTCT



>HAP30\_0.00673537 | global\_haplotype frequency=0.006735

ATAATAACCATTGGTTCGGTCTGTATGACAATTGGAATGGCTAACTTAATATTACAAATTGGAAACATAATCTCAATATGGGTTAGCCACTCAATTCAACTTGGGAATC  
AAAGTCATATTGAAACATGCAATCAAAGCGTCATTACTTATGAAAACAACACTTGGGTAAATCAGACATATGTTAACATCAGCAACACCAACTTTGCTGCTGGACAGT  
CAGTGGTTCCTCGTAAATTAGCGGGCAATTCCTCTCTCTGCCCTGTTAGTGGATGGGAGATCTACAGTAAAGACAACAGTGTAAAGAATCGGTTCCAAGGGGGATGT  
GTTTGTGATAAGGGACCCATTCATATCATGCTCCCCCTTGAATGCAGAACCTTCTTCTTGAAGTCAAGGGGCCTTGCTAAATGACAAACATTCCAATGGAACCATTAA  
AGACAGGAGCCCATATCGAACCTAATGAGCTGTCCTATTGGTGAAGTTCCTCTCCATACAACTCAAGATTTGAGTCAGTCGCTTGGTCAGCAAGTGGCTTGTGATG  
ATGGCATCAATTGGCTAACAATTGGAATTTCTGGCCAGACAATGGGGCAGTGGCTGTGTTAAAGTACAATGGCATAATAACAGACACTATCAAGAGTTGGAGAAAC  
AATATATTGAGAACACAAGAGTCTGAATGTGCATGTGTAATGGTTCCTTGTCTTACCATAATGACCGATGGACCAAGTGTGACAGGCCTCATAACAAGATCTTCAGA  
ATAGAAAAGGGAAAGATAGTCAAATCAGTCGAAATGAATGCCCTAATTACTATGAGGAATGCTCCTGTTATCCTGATTCTAGTAAATCACATGTGTGTGCAGG  
GATAACTGGCATGGCTCGAATCGACCGTGGGTGTCTTTCAACCAGAATCTGGAATATCAGATAGGATACATATGCAGTGGGGTTTTCCGAGACAATCCACGCCCTA  
ATGATAAGACAGGCAGTTGTGGTCCAGTATCGTCTAATGGAGCAAAATGGAGTAAAGGATTTTCATTCAAATACGGCAATGGTGTGGATAGGGGAGAACTAAAAGC  
ATTAGTTCAAGAAAAGGTTTTGAGATGATTTGGGATCCGAATGGATGGACTGGGACAGACAATAACTTCTCAATAAAGCAAGATATCGTAGGAATAAAAGAGTGGTC  
AGGATATAGCGGGAGTTTTGTTGAGCATCCAGAACTAACAGGGCTGGATTGTATAAGACCTTGCTTCTGGGTGAACTAATCAGAGGGCGACCCGAAGAGAACACA  
ATCTGGACTAGCGGGAGCAGCATATCCTTTTGTGGTGTAAACAGTGACACTGTGGGTTGGTCT

>HAP31\_0.00662758 | global\_haplotype frequency=0.006628

ATAATAACCATTGGTTCGGTCTGTATGACAATTGGAATGGCTAACTTAATATTACAAATTGGAAACATAATCTCAATATGGGTTAGCCACTCAATTCAACTTGGGAATC  
AAAGTCATATTGAAACATGCAATCAAAGCGTCATTACTTATGAAAACAACACTTGGGTAAATCAGACATATGTTAACATCAGCAACACCAACTTTGCTGCTGGACAGT  
CAGTGGTTCCTCGTAAATTAGCGGGCAATTCCTCTCTCTGCCCTGTTAGTGGATGGGCTATATACAGTAAAGACAACAGTGTAAAGAATCGGTTCCAAGGGGGATGT  
GTTTGTGATAAGGGACCCATTCATATCATGCTCCCCCTTGAATGCAGAACCTTCTTCTTGAAGTCAAGGGGCCTTGCTAAATGACAAACATTCCAATGGAACCATTAA  
AGACAGGAGCCCATATCGAACCTAATGAGCTGTCCTATTGGTGAAGTTCCTCTCCATACAACTCAAGATTTGAGTCAGTCGCTTGGTCAGCAAGTGGCTTGTGATG  
ATGGCATCAATTGGCTAACAATTGGAATTTCTGGCTCGGAAAATGGGGCAGTGGCTGTGTTAAAGTACAATGGCATAATAACAGACACTATCAAGAGTTGGAGAAAC  
AATATATTGAGAACACAAGAGTCTGAATGTGCATGTGTAATGGTTCCTTGTCTTACCATAATGACCGATGGACCAAGTGTGACAGGCCTCATAACAAGATCTTCAGA  
ATAGAAAAGGGAAAGATAGTCAAATCAGTCGAAATGAATGCCCTAATTACTATGAGGAATGCTCCTGTTATCCTGATTCTAGTAAATCACATGTGTGTGCAGG  
GATAACTGGCATGGCTCGAATCGACCGTGGGTGTCTTTCAACCAGAATCTGGAATATCAGATAGGATACATATGCAGTGGGGTTTTCCGAGACAATCCACGCCCTA  
ATGATAAGACAGGCAGTTGTGGTCCAGTATCGTCTAATGGAGCAAAATGGAGTAAAGGATTTTCATTCAAATACGGCAATGGTGTGGATAGGGGAGAACTAAAAGC  
ATTAGTTCAAGAAAAGGTTTTGAGATGATTTGGGATCCGAATGGATGGACTGGGACAGACAATAACTTCTCAATAAAGCAAGATATCGTAGGAATAAAAGAGTGGTC  
AGGATATAGCGGGAGTTTTGTTGAGCATCCAGAACTAACAGGGCTGGATTGTATAAGACCTTGCTTCTGGGTGAACTAATCAGAGGGCGACCCGAAGAGAACACA  
ATCTGGACTAGCGGGAGCAGCATATCCTTTTGTGGTGTAAACAGTGACACTGTGGGTTGGTCT

>HAP32\_0.00652152 | global\_haplotype frequency=0.006522

ATAATAACCATTGGTTCGGTCTGTATGACAATTGGAATGGCTAACTTAATATTACAAATTGGAAACATAATCTCAATATGGGTTAGCCACTCAATTCAACTTGGGAATC  
AAAGTCATATTGAAACATGCAATCAAAGCGTCATTACTTATGAAAACAACACTTGGGTAAATCAGACATATGTTAACATCAGCAACACCAACTTTGCTGCTGGACAGT  
CAGTGGTTCCTGTAATAGCGGGCAATTCCTCTCTCTGCCCTGTTAGTGGATGGGCTATATACAGTAAAGACAACAGTGTAAAGAATCGGTTCCAAGGGGGATGT  
GTTTGTGATAAGGGACCCATTCATATCATGCTCCCCCTTGAATGCAGAACCTTCTTCTTGAAGTCAAGGGGCCTTGCTAAATGACAAACATTCCAATGGAACCATTAA  
AGACAGGAGCCCATATCGAACCCTAATGAGCTGTCTATTGGTGAAGTTCCTCTCCATACAACACTCAAGATTTGAGTCAGTCGCTTGGTCAGCAAGTGGCTTGTGATG  
ATGGCATCAATTGGCTAACAATTGGAATTTCTGGCCCATACAATGGGGCAGTGGCTGTGTTAAAGTACAATGGCATAATAACAGACACTATCAAGAGTTGGAGAAAC  
AATATATTGAGAACACAAGAGTCTGAATGTGCATGTGTAATGGTTCCTTACCATAATGACCGATGGACCAAGTGATGGACAGGCCTCATACAAGATCTTCAGA  
ATAGAAAAGGGAAAGATAGTCAAATCAGTCGAAATGAATGCCCTAATTATTACTATGAGGAATGCTCCTGTTATCCTGATTCTAGTGAATCACATGTGTGTGCAGG  
GATAACTGGCATGGCTCGAATCGACCGTGGGTGTCTTTCAA-CAG-ATC-  
GGAAGAGCACACAGGATACATATGCAGTGGGGTTTTTCGGAGACAATCCACGCCCTAATGATAAGACAGGCAGTTGTGGTCCAGTATCGTCTAATGGAGCAAATGGA  
GTAAAAGGATTTTCATTCAAATACGGCAATGGTGTGGATAGGGGAGAACTAAAAGCATTAGTTCAAGAAAAGGTTTTGAGATGATTTGGGATCCGAATGGATGGAC  
TGGGACAGACAATAACTTCTCAATAAAGCAAGATATCGTAGGAATAAAGAGTGGTCAGGATATAGCGGGAGTTTTGTTGAGCATCCAGAACTAACAGGGCTGGATT  
GTATAAGACCTTGCTTCTGGGTGAACTAATCAGAGGGCGACCCGAAGAGAACAATCTGGACTAGCGGGAGCAGCATATCCTTTTGTGGTGTAAACAGTGACAC  
TGTGGGTTGGTCT

>HAP33\_0.00651703 | global\_haplotype frequency=0.006517

ATAATAACCATTGGTTCGGTCTGTATGACAATTGGAATGGCTAACTTAATATTACAAATTGGAAACATAATCTCAATATGGGTTAGCCACTCAATTCAACTTGGGAATC  
AAAGTCATATTGAAACATGCAATCAAAGCGTCATTACTTATGAAAACAACACTTGGGTAAATCAGACATATGTTAACATCAGCAACACCAACTTTGCTGCTGGACAGT  
CAGTGGTTCCTGTAATAGCGGGCAATTCCTCTCTCTGCCCTGTTAGTGGATGGGCTATATACAGTAAAGACAACAGTGTAAAGAATCGGTTCCAAGGGGGATGT  
GTTTGTGATAAGGGGACCCATTCATATCATGCTCCCCCTTGAATGCAGAACCTTCTTCTTGAAGTCAAGGGGCCTTGCTAAATGACAAACATTCCAATGGAACCATTAA  
AGACAGGAGCCCATATCGAACCCTAATGAGCTGTCTATTGGTGAAGTTCCTCTCCATACAACACTCAAGATTTGAGTCAGTCGCTTGGTCAGCAAGTGGCTTGTGATG  
ATGGCATCAATTGGCTAACAATTGGAATTTAGATCGAAGACAATGGGGCAGTGGCTGTGTTAAAGTACAATGGCATAATAACAGACACTATCAAGAGTTGGAGAAAC  
AATATATTGAGAACACAAGAGTCTGAATGTGCATGTGTAATGGTTCCTTACCATAATGACCGATGGACCAAGTGATGGACAGGCCTCATACAAGATCTTCAGA  
ATAGAAAAGGGAAAGATAGTCAAATCAGTCGAAATGAATGCCCTAATTATTACTATGAGGAATGCTCCTGTTATCCTGATTCTAGTGAATCACATGTGTGTGCAGG  
GATAACTGGCATGGCTCGAATCGACCGTGGGTGTCTTTCAACCAGAATCTGGAATATCAGATAGGATACATATGCAGTGGGGTTTTTCGGAGACAATCCACGCCCTA  
ATGATAAGACAGGCAGTTGTGGTCCAGTATCGTCTAATGGAGCAAATGGAGTAAAAGGATTTTCATTCAAATACGGCAATGGTGTGGATAGGGGAGAACTAAAAGC  
ATTAGTTCAAGAAAAGGTTTTGAGATGATTTGGGATCCGAATGGATGGACTGGGACAGACAATAACTTCTCAATAAAGCAAGATATCGTAGGAATAAAGAGTGGTC  
AGGATATAGCGGGAGTTTTGTTGAGCATCCAGAACTAACAGGGCTGGATTGTATAAGACCTTGCTTCTGGGTGAACTAATCAGAGGGCGACCCGAAGAGAACA  
ATCTGGACTAGCGGGAGCAGCATATCCTTTTGTGGTGTAAACAGTGACACTGTGGGTTGGTCT

>HAP34\_0.00626361 | global\_haplotype frequency=0.006264

ATAATAACCATTGGTTCGGTCTGTATGACAATTGGAATGGCTAACTTAATATTACAAATTGGAAACATAATCTCAATATGGGTTAGCCACTCAATTCAACTTGGGAATC  
AAAGTCATATTGAAACATGCAATCAAAGCGTCATTACTTATGAAAACAACACTTGGGTAAATCAGACATATGTTAACATCAGCAACACCAACTTTGCTGCTGGACAGT  
CAGTGGTTCCTGTAATAGCGGGCAATTCCTCTCTCTGCGCTCTTCCGATCTGGGCTATATACAGTAAAGACAACAGTGTAAAGAATCGGTTCCAAGGGGGATGT  
GTTTGTGATAAGGGACCCATTCATATCATGCTCCCCCGGAATGCAGAACCTTCTTCTTACTCAAGGGGCCTTGCTAAATGACAAACATTCCAATGGAACCATTA  
AAGACAGGAGCCCATATCGAACCTAATGAGCTGTCTATTGGTGAAGTTCCTCTCCATACAACTCAAGATTTGAGTCAGTCGCTTGGTCAGCAAGTGCTTGTGCAT  
GATGGCATCAATTGGCTAACAATTGGAATTTCTGGCCAGACAATGGGGCAGTGGCTGTGTTAAAGTACAATGGCATAATAACAGACACTATCAAGAGTTGGAGAAA  
CAATATATTGAGAACACAAGAGTCTGAATGTGCATGTGTAATGGTTCCTTACTTACCATAATGACCGATGGACCAAGTGATGGACAGGCCTCATAACAAGATCTTCAG  
AATAGAAAAGGGAAAAGATAGTCAAATCAGTCGAAATGAATGCCCTAATTACTATGAGGAATGCTCCTGTTATCCTGATTCTAGTGAAATCACATGTGTGTGCAG  
GGATAACTGGCATGGCTCGAATCGACCGTGGGTGTCTTTCAACCAGAATCTGGAATATCAGATAGGATACATATGCAGTGGGGTTTTTCGGAGACAATCCACGCCCT  
AATGATAAGACAGGCAGTTGTGGTCCAGTATCGTCTAATGGAGCAAATGGAGTAAAAGGATTTTCATTCAAATACGGCAATGGTGTGGATAGGGGAGAACTAAAAG  
CATTAGTTCAAGAAAAGTTTTGAGATGATTTGGGATCCGAATGGATGGACTGGGACAGACAATAACTTCTCAATAAAGCAAGATATCGTAGGAATAAAGAGTGGT  
CAGGATATAGCGGGAGTTTTGTTGAGCATCCAGAACTAACAGGGCTGGATTGTATAAGACCTTGCTTCTGGGTTGAACTAATCAGAGGGCGACCCGAAGAGAACAC  
AATCTGGACTAGCGGGAGCAGCATATCCTTTTGTGGTGTAAACAGTGACACTGTGGGTTGGTCT

>HAP35\_0.00619153 | global\_haplotype frequency=0.006192

ATAATAACCATTGGTTCGGTCTGTATGACAATTGGAATGGCTAACTTAATATTACAAATTGGAAACATAATCTCAATATGGGTTAGCCACTCAATTCAACTTGGGAATC  
AAAGTCATATTGAAACATGCAATCAAAGCGTCATTACTTATGAAAACAACACTTGGGTAAATCAGACATATGTTAACATCAGCAACACCAACTTTGCTGCTGGACAGT  
CAGTGGTTCCTGTAATAGCGGGCAATTCCTCTCTCTGCCCTGTTAGTGGATGGGCTATATACAGTAAAGAGATCGGAAGAGCACACGTTTCCAAGGGGGATGT  
GTTTGTGATAAGGGACCCATTCATATCATGCTCCCCCTTGGAAATGCAGAACCTTCTTCTTACTCAAGGGGCCTTGCTAAATGACAAACATTCCAATGGAACCATTAA  
AGACAGGAGCCCATATCGAACCTAATGAGCTGTCTATTGGTGAAGTTCCTCTCCATACAACTCAAGATTTGAGTCAGTCGCTTGGTCAGCAAGTGCTTGTGCATG  
ATGGCATCAATTGGCTAACAATTGGAATTTCTGGCCAGACAATGGGGCAGTGGCTGTGTTAAAGTACAATGGCATAATAACAGACACTATCAAGAGTTGGAGAAAC  
AATATATTGAGAACACAAGAGTCTGAATGTGCATGTGTAATGGTTCCTTACTTACCATAATGACCGATGGACCAAGTGATGGACAGGCCTCATAACAAGATCTTCAGA  
ATAGAAAAGGGAAAAGATAGTCAAATCAGTCGAAATGAATGCCCTAATTACTATGAGGAATGCTCCTGTTATCCTGATTCTAGTGAAATCACATGTGTGTGCAGG  
GATAACTGGCATGGCTCGAATCGACCGTGGGTGTCTTTCAACCAGAATCTGGAATATCAGATAGGATACATATGCAGTGGGGTTTTTCGGAGACAATCCACGCCCTA  
ATGATAAGACAGGCAGTTGTGGTCCAGTATCGTCTAATGGAGCAAATGGAGTAAAAGGATTTTCATTCAAATACGGCAATGGTGTGGATAGGGGAGAACTAAAAGC  
ATTAGTTCAAGAAAAGTTTTGAGATGATTTGGGATCCGAATGGATGGACTGGGACAGACAATAACTTCTCAATAAAGCAAGATATCGTAGGAATAAAGAGTGGTC  
AGGATATAGCGGGAGTTTTGTTGAGCATCCAGAACTAACAGGGCTGGATTGTATAAGACCTTGCTTCTGGGTTGAACTAATCAGAGGGCGACCCGAAGAGAACACA  
ATCTGGACTAGCGGGAGCAGCATATCCTTTTGTGGTGTAAACAGTGACACTGTGGGTTGGTCT

>HAP36\_0.0056785 | global\_haplotype frequency=0.005679

ATAATAACCATTGGTTCGGTCTGTATGACAATTGGAATGGCTAACTTAATATTACAAATTGGAAACATAATCTCAATATGGGTTAGCCACTCAATTCAACTTGGGAATC  
AAAGTCATATTGAAACATGCAATCAAAGCGTCATTACTTATGAAAACAACACTTGGGTAAATCAGACATATGTTAACATCAGCAACACCAACTTTGCTGCTGGACAGT  
CAGTGGTTCCTGTAATAGCGGGCAATTCCTCTCTCTGCCCTGTTAGTGGATGGGCTATATACAGTAAAGACAACAGTGTAAAGAATCGGTTCCAAGGGGGATGT  
GTTTGTGATAAGGGACCCATTCATATCATGCTCCCCCTTGAATGCAGAACCTTCTTCTTGAAGTCAAGGGGCCTTGCTAAATGACAAACATTCCAATGGAACCATTAA  
AGACAGGAGCCCATATCGAACCCTAATGAGCTGTCCTATTGGTGAAGTTCCTCTCCATACAACTCAAGATTTGAGTCAGTCGCTTGGTCAGCAAGTGGCTTGTGATG  
ATGGCATCAATTGGCTAACAATTGGAATTTCTGGCCAGACGATCGGGCAGTGGCTGTGTTAAAGTACAATGGCATAATAACAGACACTATCAAGAGTTGGAGAAAC  
AATATATTGAGAACAACAAGAGTCTGAATGTGCATGTGTAATGGTTCCTTGGCTTACCATAATGACCGATGGACCAAGTGTGACAGGCCTCATAACAAGATCTTCAGA  
ATAGAAAAGGGAAAGATAGTCAAATCAGTCGAAATGAATGCCCTAATTACTATGAGGAATGCTCCTGTTATCCTGATTCTAGTGAATCACATGTGTGTGCAGG  
GATAACTGGCATGGCTCGAATCGACCGTGGGTGTCTTTCAACCAGAATCTGGAATATCAGATAGGATACATATGCAGTGGGGTTTTTCGGAGACAATCCACGCCCTA  
ATGATAAGACAGGCAGTTGTGGTCCAGTATCGTCTAATGGAGCAAATGGAGTAAAGGATTTTCATTCAAATACGGCAATGGTGTGGATAGGGGAGAACTAAAAGC  
ATTAGTTCAAGAAAAGGTTTTGAGATGATTTGGGATCCGAATGGATGGACTGGGACAGACAATAACTTCTCAATAAAGCAAGATATCGTAGGAATAAAGAGTGGTC  
AGGATATAGCGGGAGTTTTGTTTTCAGCATCCAGAACTAACAGGGCTGGATTGTATAAGACCTTGCTTCTGGGTGAACTAATCAGAGGGCGACCCGAAGAGAACACA  
ATATCGACTAGCGGGAGCAGCATATCCTTTTGTGGTGTAAACAGTGACACTGTGGGTTGGTCT

>HAP37\_0.00560945 | global\_haplotype frequency=0.005609

ATAATAACCATTGGTTCGGTCTGTATGACAATTGGAATGGCTAACTTAATATTACAAATTGGAAACATAATCTCAATATGGGTTAGCCACTCAATTCAACTTGGGAATC  
AAAGTCATATTGAAACATGCAATCAAAGCGTCATTACTTATGAAAACAACACTTGGGTAAATCAGACATATGTTAACATCAGCAACACCAACTTTGCTGCTGGACAGT  
CAGTGGTTCCTGTAATAGCGGGCAATTCCTCTCTCTGCCCTCGGAAGAGGATGGGCTATATACAGTAAAGACAACAGTGTAAAGAATCGGTTCCAAGGGGGATGT  
GTTTGTGATAAGGGACCCATTCATATCATGCTCCCCCTTGAATGCAGAACCTTCTTCTTGAAGTCAAGGGGCCTTGCTAAATGACAAACATTCCAATGGAACCATTAA  
AGACAGGAGCCCATATCGAACCCTAATGAGCTGTCCTATTGGTGAAGTTCCTCTCCATACAACTCAAGATTTGAGTCAGTCGCTTGGTCAGCAAGTGGCTTGTGATG  
ATGGCATCAATTGGCTAACAATTGGAATTTCTGGCCAGACAATGGGGCAGTGGCTGTGTTAAAGTACAATGGCATAATAACAGACACTATCAAGAGTTGGAGAAAC  
AATATATTGAGAACAACAAGAGTCTGAATGTGCATGTGTAATGGTTCCTTGGCTTACCATAATGACCGATGGACCAAGTGTGACAGGCCTCATAACAAGATCTTCAGA  
ATAGAAAAGGGAAAGATAGTCAAATCAGTCGAAATGAATGCCCTAATTACTATGAGGAATGCTCCTGTTATCCTGATTCTAGTGAATCACATGTGTGTGCAGG  
GATAACTGGCATGGCTCGAATCGACCGTGGGTGTCTTTCAACCAGAATCTGGAATATCAGATAGGATACATATGCAGTGGGGTTTTTCGGAGACAATCCACGCCCTA  
ATGATAAGACAGGCAGTTGTGGTCCAGTATCGTCTAATGGAGCAAATGGAGTAAAGGATTTTCATTCAAATACGGCAATGGTGTGGATAGGGGAGAACTAAAAGC  
ATTAGTTCAAGAAAAGGTTTTGAGATGATTTGGGATCCGAATGGATGGACTGGGACAGACAATAACTTCTCAATAAAGCAAGATATCGTAGGAATAAAGAGTGGTC  
AGGATATAGCGGGAGTTTTGTTTTCAGCATCCAGAACTAACAGGGCTGGATTGTATAAGACCTTGCTTCTGGGTGAACTAATCAGAGGGCGACCCGAAGAGAACACA  
ATCTGGACTAGCGGGAGCAGCATATCCTTTTGTGGTGTAAACAGTGACACTGTGGGTTGGTCT

>HAP38\_0.00538554 | global\_haplotype frequency=0.005386

ATAATAACCATTGGTTCGGTCTGTATGACAATTGGAATGGCTAACTTAATATTACAAATTGGAAACATAATCTCAATATGGGTTAGCCACTCAATTCAACTTGGGAATC  
AAAGTCATATTGAAACATGCAATCAAAGCGTCATTACTTATGAAAACAACACTTGGGTAAATCAGACATATGTTAACATCAGCAACACCAACTTTGCTGCTGGACAGT  
CAGTGGTTCCTGTAATAGCGGGCAATTCCTCTCTCTGCCCTGTTAGTGGATGGGCTATATACAGTAAAGACAACAGTGTAAAGAATCGGTTCCAAGGGGGATGT  
GTTTGTGATAAGGGACCCATTCATATCATGCTCCCCCTTGAATGCAGAACCTTCTTCTTGAAGTCAAGGGGCCTTGCTAAATGACAAACATTCCAATGGAACCATTAA  
AGACAGGAGCCCATATCGAACCCTAATGAGCTGTCCTATTGGTGAAGTTCCTCTCCATACAACTCAAGATTTGAGTCAGTCGCTTGGTCAGCAAGTGGCTTGTGATG  
ATGGCATCAATTGGCTAACAATTGGAATTTCTGGCCAGACAATGGGGCAGTGGCTGTGTTAAAGTACAATGGCATAATAACAGACACTATCAAGAGTTGGAGAAAC  
AATATATTGAGAACAACAAGAGTCTGAATGTGCATGTGTAATGGTTCTTGGCTTACCATAATGACCGATGGACCAAGTGTGACAGGCCTCATAACAAGATCTTCAGA  
ATAGAAAAGGGAAAGATAGTCAAATCAGTCGAAATGAATGCCCTAATTATTACTATGAGGAATGCTCCTGTTATCCTGATTCTAGTAAATCACATGTGTGTGCAGG  
GATAACTGGCATGGCTCGAATCGACCGTGGGTGTCTTTCAACCAGAATCTGGAATATCAGATAGGATACATATGCCGAGGGGTTTTCCGAGACAATCCACGCCCTA  
ATGATAAGACAGGCAGTTGTGGTCCAGTATCGTCTAATGGAGCAAAATGGAGTAAAGGATTTTCATTCAAATACGGAAGTGGTGTGGATAGGGGAGAACTAAAAGC  
ATTAGTTCAAGAAAAGGTTTTGAGATGATTTGGGATCCGAATGGATGGACTGGGACAGACAATAACTTCTCAATAAAGCAAGATATCGTAGGAATAAAGAGTGGTC  
AGGATATAGCGGGAGTTTTGTTTCAGCATCCAGAACTAACAGGGCTGGATTGTATAAGACCTTGCTTCTGGGTTGAACTAATCAGAGGGCGACCCGAAGAGAACA  
ATCTGGACTAGCGGGAGCAGCATATCCTTTTGTGGTGTAAACAGTGACACTGTGGGTTGGTCT

>HAP39\_0.00537187 | global\_haplotype frequency=0.005372

ATAATAACCATTGGTTCGGTCTGTATGACAATTGGAATGGCTAACTTAATATTACAAATTGGAAACATAATCTCAATATGGGTTAGCCACTCAATTCAACTTGGGAATC  
AAAGTCATATTGAAACATGCAATCAAAGCGTCATTACTTATGAAAACAACACTTGGGTAAATCAGACATATGTTAACATCAGCAACACCAACTTTGCTGCTGGACAGT  
CAGTGGTTCCTGTAATAGCGGGCAATTCCTCTCTCTGCCCTGTTAGTGGATGGGCTATATACAGTAAAGACAACAGTGTAAAGAATCGGTTCCAAGGGGGATGT  
GTTTGTGATAAGGGACCCATTCATATCATGCTCCCCCTTGAATGCAGAACCTTCTTCTTGAAGTCAAGGGGCCTTGCTAAATGACAAACATTCCAATGGAACCATTAA  
AGACAGGAGCCCATATCGAACCCTAATGAGCTGTCCTATTGGTGAAGTTCCTCTCCATACAACTCAAGATTTGAGTCAGTCGCTTGGTCAGCAAGTGGCTTGTGATG  
ATGGCATCAATTGGCTAACAATTGGAATTTCTGGCCAGACAATGGGGCAGTGGCTGTGTTAAAGTACAATGGCATAATAACAGACACTATCAAGAGTTGGAGAAAC  
AATATATTGAGAACAACAAGAGTCTGAATGTGCATGTGTAATGGTTCTTGGCTTACCATAATGACCGATGGACCAAGTGTGACAGGCCTCATAACAAGATCTTCAGA  
ATAGAAAAGGGAAAGATAGTCAAATCAGTCGAAATGAATGCCCTAATTATTACTATGAGGAATGCTCCTGTTATCCTGATTCTAGTAAATCACATGTGTGTGCAGG  
GATAACTGGCATGGCTCGAATCGACCGTGGGTGTCTTTCAACCAGAATCTGGAATATCAGATAGGATACATATGCAGTGGGGTTTTCCGAGACAATCCACGCCCTA  
ATGATAAGACAGGCAGTTGTGGTCCAGTATCGTCTAATGGAGCAAAATGGAGTAAAGGATTTTCATTCAAATACGGAAGTGGTGTGGATAGGGGAGAACTAAAAGC  
ATTAGTTCAAGAAAAGGTTTTGAGATGATTTGGGATCCGAATGGATGGACTGGGACAGACAATAACTTCTCAATAAAGCAAGATATTGTAGGAATAAAGAGTGGTCA  
GGATATAGCGGGAGTTTTGTTTCAGCATCCAGAACTAACAGGGCTGGATTGTATAAGACCTTGCTTCTGGGTTGAACTAATCAGAGGGCGACCCGAAGAGAACA  
TCTGGACTAGCGGGAGCAGCATATCCTTTTGTGGTGTAAACAGGGAAGCTGTGGGTTGGTCT

>HAP40\_0.00452855 | global\_haplotype frequency=0.004529

ATAATAACCATTGGTTCGGTCTGTATGACAATTGGAATGGCTAACTTAATATTACAAATTGGAAACATAATCTCAATATGGGTTAGCCACTCAATTCAACTTGGGAATC  
AAAGTCATATTGAAACATGCAATCAAAGCGTCATTACTTATGAAAACAACACTTGGGTAAATCAGACATATGTTAACATCAGCAACACCAACTTTGCTGCTGGACAGT  
CAGTGGTTCCTGTAATAGCGGGCAATTCCTCTCTCTGCCCTGTTAGTGGATGGGCTATATACAGTAAAGACAACAGTGTAGAATCGGTTCCAAGGGGGATGT  
GTTTGCATAAGGGAACCATTTCATATCATGCTCCCCCTTGAATGCAGAACCTTCTTCTTACTCAAGGGGCCTTGCTAAATGACAAACATTCCAATGGAACCATTAA  
AGACAGGAGCCCATATCGAACCCTAATGAGCTGTCCTATTGGTGAAGTTCCTCTCCATACAACTCAAGATTTGAGTCAGTCGCTTGATCGGAAAGCACACGTCATG  
ATGGCATCAATTGGCTAACAATTGGAATTTCTGGCCCAGACAATGGGGCAGTGGCTGTGTTAAAGTACAATGGCATAATAACAGAGA-  
TCTCAAGAGTTGGAGAAACAATATATTGAGAACACAAGAGTCTGAATGTGCATGTGTAATGGTTCTTGCTTTACCATAATGACCGATGGACCAAGTGATGGACAGG  
CCTCATAAAGATCTTCAGAATAGAAAAGGGAAAGATAGTCAAATCAGTCGAAATGAATGCCCTAATTATTACTATGAGGAATGCTCCTGTTATCCTGATTCTAGTG  
AAATCAGATGTGTGTGCAGGGATAACTGGCATGGCTCGAATCGACCGTGGGTGTCTTTCAACCAGAATCTGGAATATCAGATAGGATACATATGCAGTGGGGTTTTTC  
GGAGACAATCCACGCCCTAATGATAAGACAGGCAGTTGTGGTCCAGTATCGTCTAATGGAGCAAATGGAGTAAAAGGATTTTCATTCAAATACGGCAATGGTGTGTTG  
GATAGGGAGAACTAAAAGCATTAGTTCAAGAAAAGTTTTGAGATGATTTGGGATCCGAATGGATGGACTGGGACAGACAATAACTTCTCAATAAAGCAAGATATCG  
TAGGAATAAAGAGTGGTCAGGATATAGCGGGAGTTTTGTTTCAGCATCCAGAACTAACAGGGCTGGATTGTATAAGACCTTGCTTCTGGGTTGAACTAATCAGAGG  
GCGACCCGAAGAGAACAATCTGGACTAGCGGGAGCAGCATATCCTTTTGTGGTGTAAACAGTGACACTGTGGGTTGGTCT

>HAP41\_0.0040768 | global\_haplotype frequency=0.004077

ATAATAACCATTGGTTCGGTCTGTATGACAATTGGAATGGCTAACTTAATATTACAAATTGGAAACATAATCTCAATATGGGTTAGCCACTCAATTCAACTTGGGAATC  
AAAGTCATATTGAAACATGCAATCAAAGCGTCATTACTTATGAAAACAACACTTGGGTAAATCAGACATATGTTAACATCAGCAACACCAACTTTGCTGCTGGACAGT  
CAGTGGTTCCTGTAATAGCGGGCAATTCCTCTCTCTGCCCTGTTAGTGGATGGGCTATATACAGTAAAGACAACAGTGTAGAATCGGTTCCAAGGGGGATGT  
GTTTGCATAAGGGAACCATTTCATATCATGCTCCCCCTTGAATGCAGAACCTTCTTCTTACTCAAGGGGCCTTGCTAAATGACAAACATTCCAATGGAACCATTAA  
AGACAGGAGCCCATATCGAACCCTAATGAGCTGTCCTATTGGTGAAGTTCCTCTCCATACAACTCAAGATTTGAGTCAGTCGCTTGGTCAGCAAGTGCTTGTTCATG  
ATGGCATCAATTGGCTAACAATTGGAATTTCTGGCCCAGACAATGGGGCAGTGGCTGTGTTAAAGTACAATGGCATAATAACAGACACTATCAAGAGTTGGAGAAAC  
AATATATTGAGAACACAAGAGTCTGAATGTGCATGTGTAATGGTTCTTGCTTTACCATAATGACCGATGGACCAAGTGATGGACAGGCCTCATAAAGATCTTCAGA  
ATAGAAAAGGGAAAGATAGTCAAATCAGTCGAAATGAATGCCCTAATTATTACTATGAGGAATGCTCCTGTTATCCTGATTCTAGTGAATCAGATGTGTGTGCAGG  
GATAACTGGCATGGCTCGAATCGACCGTGGGTGTCTTTCAACCAGAATCTGGAATATCAGATAGGATACATGTGCAGTGGGGTTTTTCGGAGACAATCCACGCCCTA  
ATGATAAGACAGGCAGTTGTGGTCCAGAATCGTCTAATGGAGCAAATGGAGTAAAAGGATTTTCATTCAAATACGGCAATGGTGTGTTGGATAGGGAGAACTAAAAGC  
ATTAGTTCAAGAAAAGTTTTGAGATGATTTGGGATCCGAATGGATGGACTGGGACAGACAATAACTTCTCAATAAAGCAAGATATCGTAGGAATAAAGAGTGGTC  
AGGATATAGCGGGAGTTTTGTTTCAGCATCCAGAACTAACAGGGCTGGATTGTATAAGACCTTGCTTCTGGGTTGAACTAATCAGAGGGCGACCCGAAGAGAACA  
ATCTGGACTAGCGGGAGCAGCATATCCTTTTGTGGTGTAAACAGTGACACTGTGGGTTGGTCT

>HAP42\_0.00394151 | global\_haplotype frequency=0.003942

ATAATAACCATTGGTTCGGTCTGTATGACAATTGGAATGGCTAACTTAATATTACAAATTGGAAACATAATCTCAATATGGGTTAGCCACTCAATTCAACTTGGGAATC  
AAAGTCATATTGAAACATGCAATCAAAGCGTCATTACTTATGAAAACAACACTTGGGTAAATCAGACATATGTTAACATCAGCAACACCAACTTTGCTGCTGGACAGT  
CAGTGGTTCCTGAAATTAGCGGGCAATTCCTCTCTCTGCCCTGTTAGTGGATGGGCTATATACAGTAAAGACAACAGTGTAAAGAATCGGTTCCAAGGGGGATGT  
GTTTGTGATAAGGGACCCATTCATATCATGCTCCCCCTTGAATGCAGAACCTTCTTCTTGAAGGCGCTTGTAAATGACAAACATTCCAATGGAACCATTAA  
AGACAGGAGCCCATATCGAACCTAATGAGCTGTCCTATTGGTGACGATCCCTCTCCATACAACACTCAAGATTTGAGTCAGTCGCTTGGTCAGCAAGTGCTTGTGATG  
ATGGCATCAATTGGCTAACAATTGGAATTTCTGGCAGATCCAATGGGGCAGTGGCTGTGTTAAAGTACAATGGCATAATAACAGACACTATCAAGAGTTGGAGAAAC  
AATATATTGAGAACACAAGAGTCTGAATGTGCATGTGTAATGGTTCTTGTCTTACCATAATGACCGATGGACCAAGTGATGGACAGGCCTCATAACAAGATCTTCAGA  
ATAGAAAAGGGAAAGATAGTCAAATCAGTCGAAATGAATGCCCTAATTACTATGAGGAATGCTCCTGTTATCCTGATTCTAGTGAAATCACATGTGTGTGCAGG  
GATAACTGGCATGGCTCGAATCGACCGTGGGTGTCTTTCAACCAGAATCTGGAATATCAGATAGGATACATATGCAGTGGGGTTTTCCGAGACAATCCACGCCCTA  
ATGATAAGACAGGCAGTTGTGGTCCAGTATCGTCTAATGGAGCAAAATGGAGTAAAGGATTTTCATTCAAATACGGCAATGGTGTGGATAGGGGAGAACTAAAAGC  
ATTAGTTCAAGAAAAGGTTTTGAGATGATTTGGGATCCGAATGGATGGACTGGGACAGACAATAACTTCTCAATAAAGCAAGATATCGTAGGAATAAAGAGTGGTC  
AGGATATAGCGGGAGTTTTGTTTCCAGCATCCAGAACTAACAGGGCTGGATTGTATAAGACCTTGCTTCTGGGTTGAACTAATCAGAGGGCGACCCGAAGAGAACA  
ATCTGGACTAGCGGGAGCAGCATATCCTTTTGTGGTGTAAACAGTGACACTGTGGGTTGGTCT

>HAP43\_0.00367928 | global\_haplotype frequency=0.003679

ATAATAACCATTGGTTCGGTCTGTATGACAATTGGAATGGCTAACTTAATATTACAAATTGGAAACATAATCTCAATATGGGTTAGCCACTCAATTCAACTTGGGAATC  
AAAGTCATATTGAAACATGCAATCAAAGCGTCATTACTTATGAAAACAACACTTGGGTAAATCAGAC--  
ATGTTAACATCAGCAACACCAACTTTGCTGCTGGACAGTCAGTGGTTCCTGAAATTAGCGGGCAATTCCTCTCTCTGCCCTGTTAGTGGATGGGCTATATACAGT  
AAAGACAACAGTGTAAAGAATCGGTTCCAAGGGGGATGTGTTTGTGATAAGGGAACCATTTCATATCATGCTCCCCCTTGAATGCAGAACCTTCTTCTTGAAGG  
GGCCTTGTAAATGACAAACATTCCAATGGAACCATTAAAGACAGGAGCCCATATCGAACCTAATGAGCTGTCCTATTGGTGAAGTTCCTCTCCATACAACACTCAA  
GATTTGAGTCAGTCGCTTGGTCAGCAAGTGCTTGTGATGATGGCATCAATTGGCTAACAATTGGAATTTCTGGCCCAGACAATGGGGCAGTGGCTGTGTTAAAGTA  
CAATGGCATAATAACAGACACTATCAAGAGTTGGAGAAACAATATATTGAGAACACAAGAGTCTGAATGTGCATGTGTAATGGTTCTTGTCTTACCATAATGACCGA  
TGGACCAAGTGATGGACAGGCCTCATAACAAGATCTTCAGAATAGAAAAGGGAAAGATAGTCAAATCAGTCGAAATGAATGCCCTAATTACTATGAGGAATGCT  
CCTGTTATCCTGATTCTAGTGAAATCACATGTGTGTGCAGGGATAACTGGCATGGCTCGAATCGACCGTGGGTGTCTTTCAACCAGAATCTGGAATATCAGATAGGA  
TACATATGCAGTGGGGTTTTCCGAGACAATCCACGCCCTAATGATAAGACAGGCAGTTGTGGTCCAGTATCGAGAAATGGAGCAAATGGAGTAAAGGATTTTCATT  
CAAATACGGCAATGGTGTGGATAGGGGAGAACTAAAAGCATTAGTTCAAGAAAAGGTTTTGAGATGATTTGGGATCCGAATGGATGGACTGGGACAGACAATAACT  
TCTCAATAAAGCAAGATATCGTAGGAATAAAGAGTGGTCAGGATATAGCGGGAGTTTTGTTTCCAGCATCCAGAACTAACAGGGCTGGATTGTATAAGACCTTGCTTC  
TGGGTTGAACTAATCAGAGGGCGACCCGAAGAGAACAATCTGGACTAGCGGGAGCAGCATATCCTTTTGTGGTGTAAACAGTGACACTGTGGGTTGGTCT

>HAP44\_0.00361988 | global\_haplotype frequency=0.003620

ATAATAACCATTGGTTCGGTCTGTATGACAATTGGAATGGCTAACTTAATATTACAAATTGGAAACATAATCTCAATATGGGTTAGCCACTCAATTCAACTTGGGAATC  
AAAGTCATATTGAAACATGCAATCAAAGCGTCATTACTTATGAAAACAACACTTGGGTAAATCAGACATATGTTAACATCAGCAACACCAACTTTGCTGCTGGACAGT  
CAGTGGTTCCTGTAATTAGCGGGCAATTCCTCTCTCTGCCCTGTTAGTGGATGGGCTATATACAGTAAAGACAACAGTGTAAAGAATCGGTTCCAAGGGGGATGT  
GTTTGTGATAAGGGACCCATTCATATCATGCTCCCCCTTGAATGCAGAACCTTCTTCTTGAAGTCAAGGGGCCTTGCTAAATGACAAACATTCCAATGGAACCATTAA  
AGACAGGAGCCCATATCGAACCTAATGAGCTGTCCTATTGGTGAAGTTCCTCTCCATACAACTCAAGATTTGAGTCAGTCGCTTGGTCAGCAAGTGCTTGTGATG  
ATGGCATCAATTGGCTAACAATTGGAATTTCTGGCCCAGACAATGGGGCAGTGGCTGTGTTAAAGTACAATGGCATAATAACAGACACTATCAAGAGTTGGAGAAAC  
AATATATTGAGAACACAAGAGTCTGAATGTGCATGTGTAATGGTTCCTTGTCTTACCATAATGACCGATGGACCAAGTGATGGACAGGCCTCATAAAGATCTTCAGA  
ATAGAAAAGGGAAAGATAGTCAAATCAGTCGAAATGAATGCCCTAATTACTATGAGGAATGCTCCTGTTATCCTGATTCTAGTAAATCACATGTGTGTGCAGG  
GATAACTGGCATGGCTCGAATCGACCGTGGGTGTCTTTCAACCAGAATCTGGAATATCAGATAGGATACATATGCAGTGGGGTTTTTCGGAGACAATCCACGCCCTA  
ATGATAAGACAGGCAGTTGTGGTCCAGTATCGTCTAATGGAGCAAATGGAGTAAAGGATTTTCATTCAAATACGGCAATGGTGTGGATAGGGGAGAACTAAAAGC  
ATTAGTTCAAGAAAAGGTTTTGAGATGATTTGGGATCCGAATGGATGGACTGGGACAGACAATAACTTCTCAATAAAGCAAGATATCGTAGGAATCAATTAGTGGTCA  
GGATATAGCGGGAGTTTTGTTTCAGCATCCAGAACTAACAGGGCTGGATTGTATAAGACCTTGCTTCTGGGTTGAACTGACTAGCGGGAGCAGCGAAGAGAACA  
TCTGGACTAGCGGGAGCAGCATATCCTTTTGTGGTGTAAACAGTGACACTGTGGGTTGGTCT

>HAP45\_0.00360904 | global\_haplotype frequency=0.003609

ATAATAACCATTGGTTCGGTCTGTATGACAATTGGAATGGCTAACTTAATATTACAAATTGGAAACATAATCTCAATATGGGTTAGCCACTCAATTCAACTTGGGAATC  
AAAGTCATATTGAAACATGCAATCAAAGCGTCATTACTTATGAAAACAACACTTGGGTAAATCAGACATATGTTAACATCAGCAACACCAACTTTGCTGCTGGACAGT  
CAGTGGTTCCTGTAATTAGCGGGCAATTCCTCTCTCTGTCTGTTAGTGGATGGGCTATATACAGTAAAGACAACAGTGTAAAGAATCGGTTCCAAGGGGGATGT  
GTTTGTGATAAGGGACCCATTCATCGGAAGCTCCCCCTTGAATGCAGAACCTTCTTCTTGAAGTCAAGGGGCCTTGCTAAATGACAAACATTCCAATGGAACCATTAA  
AAGACAGGAGCCCATATCGAACCTAATGAGCTGTCCTATTGGTGAAGTTCCTCTCCATACAACTCAAGATTTGAGTCAGTCGCTTGGTCAGCAAGTGCTTGTGATG  
GATGGCATCAATTGGCTAACAATTGGAATTTCTGGCCCAGACAATGGGGCAGTGGCTGTGTTAAAGTACAATGGCATAATAACAGACACTATCAAGAGTTGGAGAAA  
CAATATATTGAGAACACAAGAGTCTGAATGTGCATGTGTAATGGTTCCTTGTCTTACCATAATGACCGATGGACCAAGTGATGGACAGGCCTCATAAAGATCTTCAG  
AATAGAAAAGGGAAAGATAGTCAAATCAGTCGAAATGAATGCCCTAATTACTATGAGGAATGCTCCTGTTATCCTGATTCTAGTAAATCACATGTGTGTGCAG  
GGATAACTGGCATGGCTCGAATCGACCGTGGGTGTCTTTCAACCAGAATCTGGAATATCAGATAGGATACATATGCAGTGGGGTTTTTCGGAGACAATCCACGCCCT  
AATGATAAGACAGGCAGTTGTGGTCCAGTATCGTCTAATGGAGCAAATGGAGTAAAGGATTTTCATTCAAATACGGCAATGGTGTGGATAGGGGAGAACTAAAAG  
CATTAGTTCAAGAAAAGGTTTTGAGATGATTTGGGATCCGAATGGATGGACTGGGACAGACAATAACTTCTCAATAAAGCAAGATATCGTAGGAATAAAAGAGTGGT  
CAGGATATAGCGGGAGTTTTGTTTCAGCATCCAGAACTAACAGGGCTGGATTGTATAAGACCTTGCTTCTGGGTTGAACTAATCAGAGGGGCGACCCGAAGAGAACA  
AATCTGGACTAGCGGGAGCAGCATATCCTTTTGTGGTGTAAACAGTGACACTGTGGGTTGGTCT



>HAP46\_0.00336846 | global\_haplotype frequency=0.003368

ATAATAACCATTGGTTCGGTCTGTATGACAATTGGAATGGCTAACTTAATATTACAAATTGGAAACATAATCTCAATATGGGTTAGCCACTCAATTCAACTTGGGAATC  
AAAGTCATATTGAAACATGCAATCAAAGCGTCATTACTTATGAAAACAACACTTGGGTAAATCAGACATATGTTAACATCAGCAACACCAACTTTGCTGCTGGACAGT  
CAGTGGTTCCTGTAATTAGCGGGCAATTCCTCTCTCTGCCCTGTTAGTGGATGGGCTATATACAGTAAAGACAACAGTGTAAAGAATCGGTTCCAAGGGGGATGT  
GTTTGTGATAAGGGACCCATTCATATCATGCTCCCCCTTGAATGCAGAACCTTCTTCTTGAAGTCAAGGGGCCTTGCTAAATGACAAACATTCCAATGGAACCATTAA  
AGACAGGAGCCCATATCGAACCCTAATGAGCTGTCCTATTGGTGAAGTTCCTCTCCATACAACTCAAGATTTGAGTCAGTCGCTTGGTCAGCAAGTGCTTGTGATG  
ATGGCATCAATTGGCTAACAATTGGAATTTCTGGCCAGACAATGGGGCAGTGGCTGTGTTAAAGTACAATGGCATAATAACAGACACTATCAAGAGTTGGAGAAAC  
AATATATTGAGAACACAAGAGTCTGAATGTGCATGTGTAATGGTTCCTTCTTACCATAATGACCGATGGACCAAGTGATGGACAGGCCTCATAACAAGATCTTCAGA  
ATAGAAAAGGGAAAGATAGTCAAATCAGTCGAAATGAATGCCCTAATTACTATGAGGAATGCTCCTGTTATCCTGATTCTAGTGAAATCACATGTGTGTGCAGG  
GATAACTGGCATGGCTCGAATCGACCGTGGGTGTCTTTCAACCAGAATCTGGAATATCAGATAGGATACATATGCAGTGGGGTTTTTCGGAGACAATCCACGCCCTA  
ATGATAAGACAGGCAGTTGTGGTCCAGTATCGTCTAATGGAGCAAATGGAGTAAAGGATTTTCATTCAAATACGGCAATGGTGTGGATAGGGGAGAACTAAAAGC  
ATTAGTTCAAGAAAAGGTTTTGAGATGATTTGGGATCCGAATGGATGGACTGGGACAGACAATAACTTCTCAATAAAGCAAGATATTGTAGGAATAAAGAGTGGTCA  
GGATATAGCGGGAGTTTTGTTTCAGCATCCAGAACTAACAGGGCTGGATTGTATAAGACCTTGCTTCTGGGTTGAACTAA-  
TAGAGGGCGACCCGAAGAGAACAATCTGGACTAGCGGGAGCAGCATATCCTTTTGTGGTGTAAACAGTGACACTGTGGGTTGGTCT

>HAP47\_0.00332618 | global\_haplotype frequency=0.003326

ATAATAACCATTGGTTCGGTCTGTATGACAATTGGAATGGCTAACTTAATATTACAAATTGGAAACATAATCTCAATATGGGTTAGCCACTCAATTCAACTTGGGAATC  
AAAGTCATATTGAAACATGCAATCAAAGCGTCATTACTTATGAAAACAACACTTGGGTAAATCAGACATATGTTAACATCAGCAACACCAACTTTGCTGCTGGACAGT  
CAGTGGTTCCTGTAATTAGCGGGCAATTCCTCTCTCTGCCCTGTTAGTGGATGGGCTATATACAGTAAAGACAACAGTGTAAAGAATCGGTTCCAAGGGGGATGT  
GTTTGTGATAAGGGACCCATTCATATCATGCTCCCCCTTGAATGCAGAACCTTCTTCTTGAAGTCAAGGGGCCTTGCTAAATGACAAACATTCCAATGGAACCATTAA  
AGACAGGAGCCCATATCGAACCCTAATGAGCTGTCCTATTGGTGAAGTTCCTCTCCATACGACTTCCGATCTGGGTCAGTCGCTTGGTCAGCAAGTGCTTGTGAT  
GATGGCATCAATTGGCTAACAATTGGAATTTCTGGCCAGACAATGGGGCAGTGGCTGTGTTAAAGTACAATGGCATAATAACAGACACTATCAAGAGTTGGAGAAA  
CAATATATTGAGAACACAAGAGTCTGAATGTGCATGTGTAATGGTTCCTTCTTACCATAATGACCGATGGACCAAGTGATGGACAGGCCTCATAACAAGATCTTCAG  
AATAGAAAAGGGAAAGATAGTCAAATCAGTCGAAATGAATGCCCTAATTACTATGAGGAATGCTCCTGTTATCCTGATTCTAGTGAAATCACATGTGTGTGCAG  
GGATAACTGGCATGGCTCGAATCGACCGTGGGTGTCTTTCAACCAGAATCTGGAATATCAGATAGGATACATATGCAGTGGGGTTTTTCGGAGACAATCCACGCCCT  
AATGATAAGACAGGCAGTTGTGGTCCAGTATCGTCTAATGGAGCAAATGGAGTAAAGGATTTTCATTCAAATACGGAAAGTGGTGTGGATAGGGGAGAACTAAAAG  
CATTAGTTCAAGAAAAGGTTTTGAGATGATTTGGGATCCGAATGGATGGACTGGGACAGACAATAACTTCTCAATAAAGCAAGATATCGTAGGAATAAAGAGTGGT  
CAGGATATAGCGGGAGTTTTGTTTCAGCATCCAGAACTAACAGGGCTGGATTGTATAAGACCTTGCTTCTGGGTTGAACTAATCAGAGGGCGACCCGAAGAGAACAC  
AATCTGGACTAGCGGGAGCAGCATATCCTTTTGTGGTGTAAACAGTGACACTGTGGGTTGGTCT

>HAP48\_0.00326566 | global\_haplotype frequency=0.003266

ATAATAACCATTGGTTCCGGTCTGTATGACAATTGGAATGGCTAACTTAATATTACAAATTGGAAACATAATCTCAATATGGGTTAGCCACTCAATTCAACTTGGGAATC  
AAAGTCATATTGAAACATGCAATCAAAGCGTCATTACTTATGAAAACAACACTTGGGTAAATCAGAC--  
ATGTTAACATCAGCAACACCAACTTTGCTGCTGGACAGTCAGTGGTTCCCGTGAAATTAGCGGGCAATTCCTCTCTCTGCCCTGTTAGTGGATGGGCTATATACAGT  
AAAGACAACAGTGTAAGAATCGGTTCCAAGGGGGATGTGTTTGTGATAAGGGACCCATTCATATCATGCTCCCCCTTGGAAATGCAGAACCTTCTTCTTGACTCAAGG  
GGCCTTGCTAAATGACAAACATTCCAATGGAACCATTAAGACAGGAGCCCATATCGAACCTAATGAGCTGTCCTATTGGTGAAGTTCCTCTCCATACAACCTCAA  
GATTTGAGTCAGTCGCTTGGTCAGCAAGTGCTTGTGATGATGGCATCAATTGGCTAACAATTGGAATTTCTGGCCCAGACAATCGGGCAGTGGCTGTGTTAAAGTAC  
AATGGCATAATAACAGACACTATCAAGAGTTGGAGAAACAATATATTGAGAACACAAGAGTCTGAATGTGCATGTGTAATGGTTCTTGCTTTACCATAATGACCGAT  
GGACCAAGTGATGGACAGGCCCTCATACAAGATCTTCAGAATAGAAAAGGGAAAGATAGTCAAATCAGTCGAAATGAATGCCCTAATTACTATGAGGAATGCTC  
CTGTTATCCTGATTCTAGTGAAATCACATGTGTGTGCAGGGATAACTGGCATGGCTCGAATCGACCGTGGGTGTCTTTCAACCAGAATCTGGAATATCAGATAGGAT  
ACATATGCAGTGGGGTTTTTCGGAGACAATCCACGCCCAGATGATAAGACAGGCAGTTGTGGTCCAGTATCGTCTAATGGAGCAAATGGAGTAAAAGGATTTTCATT  
AAATACGGCAATGGTGTGGATAGGGAGAATAAAAGCATTAGTTCAAGAAAAGGTTTTGAGATGATTTGGGATCCGAATGGATGGACTGGGACAGACAATAACTT  
CTCAATAAAGCAAGATATCGTAGGAATAAAAGAGTGGTCAGGATATAGCGGGAGTTTTGTTTCAGCATCCAGAACTAACAGGGCTGGATTGTATAAGACCTTGCTTCT  
GGGTGAACTAATCAGAGGGCGACCCGAAAAGAACAATCTGGACTAGCGGGAGCAGCATATCCTTTTGTGGTGTAAACAGTGACACTGTGGGTTGGTCT

>HAP49\_0.00316247 | global\_haplotype frequency=0.003162

ATAATAACCATTGGTTCCGGTCTGTATGACAATTGGAATGGCTAACTTAATATTACAAATTGGAAACATAATCTCAATATGGGTTAGCCACTCAATTCAACTTGGGAATC  
AAAGTCATATTGAAACATGCAATCAAAGCGTCATTACTTATGAAAACAACACTTGGGTAAATCAGACATATGTTAACATCAGCAACACCAACTTTGCTGCTGGACAGT  
CAGTGGTTCCCGTGAAATTAGCGGGCAATTCCTCTCTCTGCCCTGTTAGTGGATGGGCTAGATGAAGTAAAGACAACAGTGTAAAGAATCGGTTCCAAGGGGGATGT  
GTTTGTGATAAGGGACCCATTCATATCATGCTCCCCCTTGGAAATGCAGAACCTTCTTCTTGACTCAAGGGGCCTTGCTAAATGACAAACATTCCAATGGAACCATTAA  
AGACAGGAGCCCATATCGAACCTAATGAGCTGTCCTATTGGTGAAGTTCCTCTCCATACAACCTCAAGATTTGAGTCAGTCGCTTGGTCAGCAAGTGCTTGTGATG  
ATGGCATCAATTGGCTAACAATTGGAATTTCTGGCCCAGACAATGGGGCAGTGGCTGTGTTAAAGTACAATGGCATAATAACAGACACTATCAAGAGTTGGAGAAAC  
AATATATTGAGAACACAAGAGTCTGAATGTGCATGTGTAATGGTTCTTGCTTTACCATAATGACCGATGGACCAAGTGATGGACAGGCCCTCATACAAGATCTTCAGA  
ATAGAAAAGGGAAAGATAGTCAAATCAGTCGAAATGAATGCCCTAATTACTATGAGGAATGCTCCTGTTATCCTGATTCTAGTGAATCACATGTGTGTGCAGG  
GATAACTGGCATGGCTCGAATCGACCGTGGGTGTCTTTCAACCAGAATCTGGAATATCAGATAGGATACATATGCAGTGGGGTTTTTCGGAGACAATCCACGCCCTA  
ATGATAAGACAGGCAGTTGTGGTAGATCATCGTCTAATGGAGCAAATGGAGTAAAAGGATTTTCATTCAAATACGGCAATGGTGTGGATAGGGAGAATAAAAGC  
ATTAGTTCAAGAAAAGGTTTTGAGATGATTTGGGATCCGAATGGATGGACTGGGACAGACAATAACTTCTCAATAAAGCAAGATATCGTAGGAATAAAAGAGTGGTC  
AGGATATAGCGGGAGTTTTGTTTCAGCATCCAGAACTAACAGGGCTGGATTGTATAAGACCTTGCTTCTGGGTGAACTAATCAGAGGGCGACCCGAAAGAGAACA  
ATCTGGACTAGCGGGAGCAGCATATCCTTTTGTGGTGTAAACAGTGACACTGTGGGTTGGTCT

>HAP50\_0.00312884 | global\_haplotype frequency=0.003129

ATAATAACCATTGGTTTCGGTCTGTATGACAATTGGAATGGCTAACTTAATATTACAAATTGGAAACATAATCTCAATATGGGTTAGCCACTCAATTCAACTTGGGAATC  
AAAGTCATATTGAAACATGCAATCAAAGCGTCATTACTTATGAAAACAACACTTGGGTAAATCAGACATATGTTAACATCAGCAACACCAACTTTGCTGCTGGACAGT  
CAGTGGTTCCCGTGAAATTAGCGGGCAATTCCTCTCTCTGCCCTGTTAGTGGATGGGCTATATACAGTAAAGACAACAGTGTAAAGAATCGGTTCCAAGGGGGATGT  
GTTTGTGATAAGGGGACCATTTCATATCATGCTCCCCCTTGAATGCAGAACCTTCTTCTTGAAGTCAAGGGGCCTTGCTAAATGACAAACATTCCAATGGAACCATTAA  
AGACAGGAGCCCATATCGAACCCTAATGAGCTGTCTTATTGGTGAAGTTCCCTCTCCATACAACTCAAGATTTGAGTCAGTCGCTTGGTCAGCAAGTGGCTTGTGATG  
ATGGCATCAATTGGCTAACAATTGGAATTTCTGGCCCAGACAATGGGGCAGTGGCTGTGTTAAAGTACAATGGCATAATAACAGACACTATCAAGAGTTGGAGAAAC  
AATATATTGAGAACACAAGAGTCTGAATGTGCATGTGTAATGGTTCTTGCTTTACCATAATGACCGATGGACCAAGTGATGGACAGGCCTCATAAAGATCTTCAGA  
ATAGAAAAGGGAAAGATAGTCAAATCAGTCGAAATGAATGCCCTAATTATTACTATGAGGAATGCTCCTGTTATCCTGATTCTAGTGAAATCACATGTGTGTGCAGG  
GATAACTGGCATGGCTCGAATCGACCGTGGGTGTCTTTCAACCAGAATCTGGAATATCAGATAGGATACATATGCAGTGGGA---  
TCGGAAAGAGCACACGCCCTAATGATAAGACAGGCAGTTGTGGTCCAGTATCGTCTAATGGAGCAAATGGAGTAAAAGGATTTTTCATTCAAATACGGCAATGGTGT  
TGGATAGGGAGAACTAAAAGCATTAGTTCAAGAAAAGTTTTGAGATGATTTGGGATCCGAATGGATGGACTGGGACAGACAATAACTTCTCAATAAAGCAAGATAT  
CGTAGGAATAAAGAGTGGTCAGGATATAGCGGGAGTTTTGTTTCAGCATCCAGAACTAACAGGGCTGGATTGTATAAGACCTTGCTTCTGGGTTGAACTAATCAGAG  
GGCGACCCGAAGAGAACAATCTGGACTAGCGGGAGCAGCATATCCTTTTGTGGTGTAAACAGTGACACTGTGGGTTGGTCT

>HAP51\_0.00291234 | global\_haplotype frequency=0.002912

ATAATAACCATTGGTTTCGGTCTGTATGACAATTGGAATGGCTAACTTAATATTACAAATTGGAAACATAATCTCAATATGGGTTAGCCACTCAATTCAACTTGGGAATC  
AAAGTCATATTGAAACATGCAATCAAAGCGTCATTACTTATGAAAACAACACTTGGGTAAATCAGACATATGTTAACATCAGCAACACCAACTTTGCTGCTGGACAGT  
CAGTGGTTCCCGTGAAATTAGCGGGCAATTCCTCTCTCTGCCCTGTTAGTGGATGGGCTATATACAGTAAAGACAACAGTGTAAAGAATCGGTTCCAAGGGGGATGT  
GTTTGTGATAAGGGACCATTTCATATCATGCTCCCCCTTGAATGCAGAACCTTCTTCTTGAAGTCAAGGGGCCTTGCTAAATGACAAACATTCCAATGGAACCATTAA  
AGACAGGAGCCCATATCGAACCCTAATGAGCTGTCTTATTGGTGAAGTTCCCTCTCCATACAACTCAAGATTTGAGTCAGTCGCTTGGTCAGCAAGTGGCTTGTGATG  
ATGGCATCAATTGGCTAACAATTGGAATTTCTGGCCCAGACAATGGGGCAGTGGCTGTGTTAAAGTACAATGGCATAATAACAGACACTATCAAGAGTTGGAGAAAC  
AATATATTGAGAACACAAGAGTCTGAATGTGCATGTGTAATGGTTCTTGCTTTACCATAATGACCGATGGACCAAGTGATGGACAGGCCTCATAAAGATCTTCAGA  
ATAGAAAAGGGAAAGATAGTCAAATCAGTCGAAATGAATGCCCTAATTATTACTATGAGGAATGCTCCTGTTATCCTGATTCTAGTGAAATCACATGTGTGTGCAGG  
GATAACTGGCATGGCTCGAATCGACCGTGGGTGTCTTTCAACCAGAATCTGGAATATCAGATAGGATACATATGCAGTGGGGTTTTTCGGAGACAATCCACGCCCTA  
ATGATAAGACAGGCAGTTGTGGTCCAGTATCGTCTAATGGAGCAAATGGAGTAAAAGGATTTTTCATTCAAATACGGCAACTCAATTTGGATAGGGAGAACTAAAAGC  
ATTAGTTCAAGAAAAGTTTTGAGATGATTTGGGATCCGAATGGATGGACTGGGACAGACAATAACTTCTCAATAAAGCAAGATATCGTAGGAATAAAGAGTGGTC  
AGGATATAGCGGGAGTTTTGTTTCAGCATCCAGAACTAACAGGGCTGGATTGTATAAGACCTTGCTTCTGGGTTGAACTAATCAGAGGGCGACCCGAAGAGAACA  
ATATCGACTAGCGGGAGCAGCATATCCTTTTGTGGTGTAAACAGTGACACTGTGGGTTGGTCT

>HAP52\_0.0028697 | global\_haplotype frequency=0.002870

ATAATAACCATTGGTTCCGGTCTGTATGACAATTGGAATGGCTAACTTAATATTACAAATTGGAAACATAATCTCAATATGGGTTAGCCACTCAATTCAACTTGGGAATC  
AAAGTCATATTGAAACATGCAATCAAAGCGTCATTACTTATGAAAACAACACTTGGGTAAATCAGACATATGTTAACATCAGCAACACCAACTTTGCTGCTGGACAGT  
CAGTGGTTCCCGTGAAATTAGCGGGCAATTCCTCTCTCTGCCCTGTTAGTGGATGGGCTATATACAGTAAAGACAACAGTGTAAAGAATCGGTTCCAAGGGGGATGT  
GTTTGTGATAAGGGCCCCATTCATATCATGCTCCCCCTTGAATGCAGAACCTTCTTCTTGAAGGCGCCTTGTAAATGACAAACATTCCAATGGAACGATGG  
AAGAGCGGAGCCCATATCGAACCCCTAATGAGCTGTCCTATTGGTGAAGTTCCTCTCCATAACAACCTCAAGATTTGAGTCAGTCGCTTGGTCAGCAAGTGCTTGTGAT  
GATGGCATCAATTGGCTAACAATTGGAATTTCTGGCCCAGACAATGGGGCAGTGGCTGTGTTAAAGTACAATGGCATAATAACAGACACTATCAAGAGTTGGAGAAA  
CAATATATTGAGAACACAAGAGTCTGAATGTGCATGTGTAATGGTTCTTGTCTTACCATAATGACCGATGGACCAAGTGATGGACAGGCCTCATAACAAGATCTTCAG  
AAGAGAAGAGCACACGTTAGTCAAATCAGTCGAAATGAATGCCCTAATTACTATGAGGAATGCTCCTGTTATCCTGATTCTAGTGAATCACATGTGTGTGCAG  
GGATAACTGGCATGGCTCGAATCGACCGTGGGTGTCTTTCAACCAGAATCTGGAATATCAGATAGGATACATATGCAGTGGGGTTTTTCGGAGACAATCCACGCCCT  
AATGATAAGACAGGCAGTTGTGGTCCAGTATCGTCTAATGGAGCAAATGGAGTAAAAGGATTTTCATTCAAATACGGCAATGGTGTGGATAGGGGAGAACTAAAAG  
CATTAGTTCAAGAAAAGTTTTGAGATGATTTGGGATCCGAATGGATGGACTGGGACAGACAATAACTTCTCAATAAAGCAAGATATCGTAGGAATAAAGAGTGGT  
CAGGATATAGCGGGAGTTTTGTTTCAGCATCCAGAATAACAGGGCTGGATTGTATAAGACCTTGCTTCTGGGTTGAACTAATCAGAGGGCGACCCGAAGAGAACAC  
AATCTGGACTAGCGGGAGCAGCATATCCTTTTTGTGGTGTAAACAGTGACACTGTGGGTTGGTCT

>HAP53\_0.00283738 | global\_haplotype frequency=0.002837

ATAATAACCATTGGTTCCGGTCTGTATGACAATTGGAATGGCTAACTTAATATTACAAATTGGAAACATAATCTCAATATGGGTTAGCCACTCAATTCAACTTGGGAATC  
AAAGTCATATTGAAACATGCAATCAAAGCGTCATTACTTATGAAAACAACACTTGGGTAAATCAGAC--  
ATGTTAACATCAGCAACACCAACTTTGCTGCTGGACAGTCAGTGGTTCCCGTGAAATTAGCGGGCAATTCCTCTCTCTGCCCTGTTAGTGGATGGGCTATATACAGT  
AAAGACAACAGTGTAAAGAATCGGTTCCAAGGGGGATGTGTTTGTGATAAGGGACCCATTCATATCATGCTCCCCCTTGAATGCAGAACCTTCTTCTTGAAGTCAAGG  
GGCCTTGCTAAATGACAAACATTCCAATGGAACCATTAAGACAGGAGCCCATATCGAACCCCTAATGAGCTGTCCTATTGGTGAAGTTCCTCTCCATAACAACCTCAA  
GATTTGAGTCAGTCGCTTGGTCAGCAAGTGCTTGTGATGATGGCATCAATTGGCTAACAATTGGAATTTCTGGCCCAGACAATGGGGCAGTGGCTGTGTTAAAGTA  
CAATGGCATAATAACAGACACTATCAAGAGTTGGAGAAACAATATATTGAGAACACAAGAGTCTGAATGTGCATGTGTAATGGTTCTTGTCTTACCATAATGACCGA  
TGGACCAAGTGATGGACAGGCCTCATAACAAGATCTTCAGAATAGAAAAGGGAAAGATAGT-  
AGATCGGTGCAAAATGAATGCCCTAATTACTATGAGGAATGCTCCTGTTATCCTGATTCTAGTGAATCACATGTGTGTGCAGGGATAACTGGCATGGCTCGAA  
TCGACCGTGGGTGTCTTTCAACCAGAATCTGGAATATCAGATAGGATACATATGCAGTGGGGTTTTTCGGAGACAATCCACGCCCTAATGATAAGACAGGCAGTTGT  
GGTCCAGTATCGTCTAATGGAGCAAATGGAGTAAAAGGATTTTCATTCAAATACGGCAATGGTGTGGATAGGGGAGAACTAAAAGCATTAGTTCAAGAAAAGGTTTT  
GAGATGATTTGGGATCCGAATGGATGGACTGGGACAGACAATAACTTCTCAATAAAGCAAGATATCGTAGGAATAAAGAGTGGTCAGGATATAGCGGGAGTTTTGT  
TCAGCATCCAGAATAACAGGGCTGGATTGTATAAGACCTTGCTTCTGGGTTGAACTAATCAGAGGGCGACCCGAAGAGAACAATCTGGACTAGCGGGAGCAGC  
ATATCCTTTTTGTGGTGTAAACAGTGACACTGTGGGTTGGTCT

>HAP54\_0.00283495 | global\_haplotype frequency=0.002835

ATAATAACCATTGGTTCGGTCTGTATGACAATTGGAATGGCTAACTTAATATTACAAATTGGAAACATAATCTCAATATGGGTTAGCCACTCAATTCAACTTGGGAATC  
AAAGTCATATTGAAACATGCAATCAAAGCGTCATTACTTATGAAAACAACACTTGGGTAAATCAGACATATGTTAACATCAGCAACACCAACTTTGCTGCTGGACAGT  
CAGTGGTTCCTGTAATTAGCGGGCAATTCCTCTCTCTGCCCTATTAGTGGATGGGCTATATACAGTAAAGACAACAGTGTAAAGAATCGGTTCCAAGGGGGATGT  
GTTTGTGATAAGGGACCCATTCATATCAAGATCCCCCTTGAATGCAGAACCTTCTTCTTGAAGTCAAGGGGCCTTGCTAAATGACAAACATTCCAATGGAACCATTAA  
AGACAGGAGCCCATATCGAACCCTAATGAGCTGTCCTATTGGTGAAGTTCCTCTCCATACAACTCAAGATTTGAGTCAGTCGCTTGGTCAGCAAGTGCTTGTGATG  
ATGGCATCAATTGGCTAACAATTGGAATTTCTGGCCAGACAATGGGGCAGTGGCTGTGTTAAAGTACAATGGCATAATAACAGACACTATCAAGAGTTGGAGAAAC  
AATATATTGAGAACACAAGAGTCTGAATGTGCATGTGTAATGGTTCCTTACCATAATGACCGATGGACCAAGTGATGGACAGGCCTCATAACAAGATCTTCAGA  
ATAGAAAAGGGAAAGATAGTCAAATCAGTCGAAATGAATGCCCTAATTACTATGAGGAATGCTCCTGTTATCCTGATTCTAGTAAATCACATGTGTGTGCAGG  
GATAACTGGCATGGCTCGAATCGACCGTGGGTGTCTTTCAACCAGAATCTGGAATATCAGATAGGATACATATGCAGTGGGGTTTTTCGGAGACAATCCACGCCCTA  
ATGATAAGACAGGCAGTTGTGGTCCAGTATCGTCTAATGGAGCAAAATGGAGTAAAGGATTTTCATTCAAATACGGCAATGGTGTGGATAGGGGAGAACTAAAAGC  
ATTAGTTCAAGAAAAGGTTTTGAGATGATTTGGGATCCGAATGGATGGACTGGGACAGACAATAACTTCTCAATAAAGCAAGATATCGTAGGAATAAAAGAGTGGTC  
AGGATATAGCGGGAGTTTTGTTTCAGCATCCAGAACTAACAGGGCTGGATTGTATAAGACCTTGCTTCTGGGTTGAACTAATCAGAGGGCGACCCGAAGAGAACA  
ATCTGGACTAGCGGGAGCAGCATATCCTTTTGTGGTGTAAACAGTGACACTGTGGGTTGGTCT

>HAP55\_0.00267218 | global\_haplotype frequency=0.002672

ATAATAACCATTGGTTCGGTCTGTATGACAATTGGAATGGCTAACTTAATATTACAAATTGGAAACATAATCTCAATATGGGTTAGCCACTCAATTCAACTTGGGAATC  
AAAGTCATATTGAAACATGCAATCAAAGCGTCATTACTTATGAAAACAACACTTGGGTAAATCAGACATATGTTAACATCAGCAACACCAACTTTGCTGCTGGACAGT  
CAGTGGTTCCTGTAATTAGCGGGCAATTCCTCTCTCTGCCCTGTTAGTGGATGGGCTATATACAGTAAAGACAACAGTGTAAAGAATCGGTTCCAAGGGGGATGT  
GTTTGTGATAAGGGGACCCATTCATATCATGCTCCCCCTTGAATGCAGAACCTTCTTCTTGAAGTCAAGGGGCCTTGCTAAATGACAAACATTCCAATGGAACCATTAA  
AGACAGGAGCCCATATCGAACCCTAATGAGCTGTCCTATTGGTGAAGTTCCTCTCCATACAACTCAAGATTTGAGTCAGTCGCTTGGTCAGCAAGTGCTTGTGATG  
ATGGCATCAATTGGCTAACAATTGGAATTTCTGGCCAGACGATCGGGCAGTGGCTGTGTTAAAGTACAATGGCATAATAACAGACACTATCAAGAGTTGGAGAAAC  
AATATATTGAGAACACAAGAGTCTGAATGTGCATGTGTAATGGTTCCTTACCATAATGACCGATGGACCAAGTGATGGACAGGCCTCATAACAAGATCTTCAGA  
ATAGAAAAGGGAAAGATAGTCAAATCAGTCGAAATGAATGCCCTAATTACTATGAGGAATGCTCCTGTTATCCTGATTCTAGTAAATCACATGTGTGTGCAGG  
GATAACTGGCATGGCTCGAATCGACCGTGGGTGTCTTTCAACCAGAATCTGGAATATCAGATAGGATACATATGCAGTGGGA---  
TCGGAAAGAGCACACGCCCTAATGATAAGACAGGCAGTTGTGGTCCAGTATCGTCTAATGGAGCAAATGGAGTAAAGGATTTTCATTCAAATACGGCAATGGTGT  
TGGATAGGGGAGAACTAAAAGCATTAGTTCAAGAAAAGTTTTGAGATGATTTGGGATCCGAATGGATGGACTGGGACAGACAATAACTTCTCAATAAAGCAAGATAT  
CGTAGGAATAAAAGAGTGGTCAGGATATAGCGGGAGTTTTGTTTCAGCATCCAGAACTAACAGGGCTGGATTGTATAAGACCTTGCTTCTGGGTTGAACTAATCAGAG  
GGCGACCCGAAGAGAACAATCTGGACTAGCGGGAGCAGCATATCCTTTTGTGGTGTAAACAGTGACACTGTGGGTTGGTCT

>HAP56\_0.00261281 | global\_haplotype frequency=0.002613

ATAATAACCATTGGTTCGGTCTGTATGACAATTGGAATGGCTAACTTAATATTACAAATTGGAAACATAATCTCAATATGGGTTAGCCACTCAATTCAACTTGGGAATC  
AAAGTCATATTGAAACATGCAATCAAAGCGTCATTACTTATGAAAACAACACTTGGGTAAATCAGACATATGTTAACATCAGCAACACCAACTTTGCTGCTGGACAGT  
CAGTGGTTCCTGTAATAGCGGGCAATTCCTCTCTCTGCCCTGTTAGTGGATGGGCTATATACAGTAAAGACAACAGTGTAAAGAATCGGTTCCAAGGGGGATGT  
GTTTGTGATAAGGGACCCATTCATATCATGCTCCAGCTTGAATGCAGAACCTTCTTCTTGAAGGCGCTTGTAAATGACAAACATTCCAATGGAACCATTAA  
AGACAGGAGCCCATATCGAACCCTAATGAGCTGTCCTATTGGTGAAGTTCCTCTCCATACAACTCAAGATTTGAGTCAGTCGCTTGGTCAGCAAGTGTGCTGTCATG  
ATGGCATCAATTGGCTAACAATTGGAATTTCTGGCCAGACAATGGGGCAGTGGCTGTGTTAAAGTACAATGGCATAATAACAGACACTATCAAGAGTTGGAGAAAC  
AATATATTGAGAACACAAGAGTCTGAATGTGCATGTGTAATGGTTCTTGTCTTACCATAATGACCGATGGACCAAGTGTGACAGGCCTCATAACAAGATCTTCAGA  
ATAGAAAAGGGAAAGATAGTCAAATCAGTCGAAATGAATGCCCTAATTACTATGAGGAATGCTCCTGTTATCCTGATTCTAGTAAATCACATGTGTGTGCAGG  
GATAACTGGCATGGCTCGAATCGACCGTGGGTGTCTTTCAACCAGAATCTGGAATATCAGATAGGATACATATGCAGTGGGGTTTTTCGGAGAGATTAGACGGGAATA  
ATGATAAGACAGGCAGTTGTGGTCCAGTATCGTCTAATGGAGCAAATGGAGTAAAGGATTTTCATTCAAATACGGCAATGGTGTGTTGGATAGGGGAGAACTAAAAGC  
ATTAGTTCAAGAAAAGGTTTTGAGATGATTTGGGATCCGAATGGATGGACTGGGACAGACAATAACTTCTCAATAAAGCAAGATATCGTAGGAATAAAAAGAGTGGTC  
AGGATATAGCGGGAGTTTTGTTTCAGCATCCAGAACTAACAGGGCTGGATTGTATAAGACCTTGCTTCTGGGTTGAACTAATCAGAGGGCGACCCGAAGAGAACACA  
ATCTGGACTAGCGGGAGCAGCATATCCTTTTGTGGTGTAAACAGTGACACTGTGGGTTGGTCT

>HAP57\_0.0024295 | global\_haplotype frequency=0.002429

ATAATAACCATTGGTTCGGTCTGTATGACAATTGGAATGGCTAACTTAATATTACAAATTGGAAACATAATCTCAATATGGGTTAGCCACTCAATTCAACTTGGGAATC  
AAAGTCATATTGAAACATGCAATCAAAGCGTCATTACTTATGAAAACAACACTTGGGTAAATCAGACATATGTTAACATCAGCAACACCAACTTTGCTGCTGGACAGT  
CAGTGGTTCCTGTAATAGCGGGCAATTCCTCTCTCTGCCCTGTTAGTGGATGGGCTATATACAGTAAAGACAACAGTGTAAAGAATCGGTTCCAAGGGGGATGT  
GTTTGTGATAAGGGACCCATTCATATCATGCTCCCCCTTGAATGCAGAACCTTCTTCTTGAAGGCGCTTGTAAATGACAAACATTCCAATGGAACCATTAA  
AGACAGGAGCCCATATCGAACCCTAATGAGCTGTCCTATTGGTGAAGTTCCTCTCCATACAACTCAAGATTTGAGTCAGTCGCTTGGTCAGCAAGTGTGCTGTCATG  
ATGGCATCAATTGGCTAACAATTGGAATTTCTGGCCAGACAATGGGGCAGTGGCTGTGTTAAAGTACAATGGCATAATAACAGACACTATCAAGAGTTGGAGAAAC  
AATATATTGAGAACACAAGAGTCTGAATGTGCATGTGTAATGGTTCTTGTCTTACCATAATGACCGATGGACCAAGTGTGACAGGCCTCATAACAAGATCTTCAGA  
ATAGAAAAGGGAAAGATAGTCAAATCAGTCGAAATGAATGCCCTAATTACTATGAGGAATGCTCCTGTTATCCTGATTCTAGTAAATCACATGTGTGTGCAGG  
GATACCTGGCATGGCTCGAATCGACCGTGGGTGTCTTTCAACCAGAATCTGGAATATCAGATAGGATACATATGCAGTGGGGTTTTTCGGAGACAATCCAGATCGGA  
ATGATAAGACAGGCAGTTGTGGTCCAGTATCGTCTAATGGAGCAAATGGAGTAAAGGATTTTCATTCAAATACGGCAATGGTGTGTTGGATAGGGGAGAACTAAAAGC  
ATTAGTTCAAGAAAAGGTTTTGAGATGATTTGGGATCCGAATGGATGGACTGGGACAGACAATAACTTCTCAATAAAGCAAGATATCGTAGGAATAAAAAGAGTGGTC  
AGGATATAGCGGGAGTTTTGTTTCAGCATCCAGAACTAACAGGGCTGGATTGTATAAGACCTTGCTTCTGGGTTGAACTAATCAGAGGGCGACCCGAAAAGAACACA  
ATCTGGACTAGCGGGAGCAGCATATCCTTTTGTGGTGTAAACAGTGACACTGTGGGTTGGTCT

>HAP58\_0.00240802 | global\_haplotype frequency=0.002408

ATAATAACCATTGGTTCGGTCTGTATGACAATTGGAATGGCTAACTTAATATTACAAATTGGAAACATAATCTCAATATGGGTTAGCCACTCAATTCAACTTGGGAATC  
AAAGTCATATTGAAACATGCAATCAAAGCGTCATTACTTATGAAAACAACACTTGGGTAAATCAGACATATGTTAACATCAGCAACACCAACTTTGCTGCTGGACAGT  
CAGTGGTTCCTGTAATTAGCGGGCAATTCCTCTCTCTGCCCTGTTAGTGGATGGGCTATATACAGTAAAGACAACAGTGTAAAGAATCGGTTCCAAGGGGGATGT  
GTTTGTGATAAGGGACCCATTCATATCATGCTCCCCCTTGAATGCAGAACCTTCTTCTTGAAGTCAAGGGGCCTTGCTAAATGACAAACATTCCAATGGAACGATGG  
AAGAGCGGAGCCCATATCGAACCCCTAATGAGCTGTCTTATTGGTGAAGTTCCTCTCCATACAACACTCAAGATTTGAGTCAGTCGCTTGGTCAGCAAGTGCTTGTGAT  
GATGGCATCAATTGGCTAACAATTGGAATTTCTGGCCAGACGATCGGGCAGTGGCTGTGTTAAAGTACAATGGCATAATAACAGACACTATCAAGAGTTGGAGAAA  
CAATATATTGAGAACAACAAGAGTCTGAATGTGCATGTGTAATGGTTCCTTACCATAATGACCGATGGACCAAGTGATGGACAGGCCTCATAACAAGATCTTCAG  
AATAGAAAAGGGAAAGATAGTCAAATCAGTCGAAATGAATGCCCTAATTACTATGAGGAATGCTCCTGTTATCCTGATTCTAGTGAATCACATGTGTGTGCAG  
GGATAACTGGCATGGCTCGAATCGACCGTGGGTGTCTTTCAACCAGAATCTGGAATATCAGATAGGATACATATGCAGTGGGAGATCGGAAGAGAATCCACGCCCT  
AATGATAAGACAGGCAGTTGTGGTCCAGTATCGTCTAATGGAGCAAATGGAGTAAAAGGATTTTCATTCAAATACGGCAATGGTGTGGATAGGGGAGAACTAAAAG  
CATTAGTTCAAGAAAAGGTTTTGAGATGATTTGGGATCCGAATGGATGGACTGGGACAGACAATAACTTCTCAATAAAGCAAGATATCGTAGGAATAAAGAGTGGT  
CAGGATATAGCGGGAGTTTTGTTGAGCATCCAGAATAACAGGGCTGGATTGTATAAGACCTTGCTTCTGGGTTGAACTAATCAGAGGGGCGACCCGAAGAGAACAC  
AATCTGGACTAGCGGGAGCAGCATATCCTTTTGTGGTGTAAACAGTGACACTGTGGGTTGGTCT

>HAP59\_0.00236867 | global\_haplotype frequency=0.002369

ATAATAACCATTGGTTCGGTCTGTATGACAATTGGAATGGCTAACTTAATATTACAAATTGGAAACATAATCTCAATATGGGTTAGCCACTCAATTCAACTTGGGAATC  
AAAGTCATATTGAAACATGCAATCAAAGCGTCATTACTTATGAAAACAACACTTGGGTAAATCAGACATATGTTAACATCAGCAACACCAACTTTGCTGCTGGACAGT  
CAGTGGTTCCTGTAATTAGCGGGCAATTCCTCTCTCTGCCCTGTTAGTGGATGGGCTATATACAGTAAAGACAACAGTGTAAAGAATCGGTTCCAAGGGGGATGT  
GTTTGTGATAAGGGACCCATTCATATCATGCTCCCCCTTGAATGCAGAACCTTCTTCTTGAAGTCAAGGGGCCTTGCTAAATGACAAACATTCCAATGGAACCATTAA  
AGACAGGAGCCCATATCGAACCCCTAATGAGCTGTCTTATTGGTGAAGTTCCTCTCCATACAACACTCAAGATTTGAGTCAGTCGCTTGGTCAGCAAGTGCTTGTGATG  
ATGGCATCAATTGGCTAACAATTGGAATTTCTGGCCAGACAATGGGGCAGTGGCTGTGTTAAAG-  
AGATCGGAAGAGCACCAGACACTATCAAGAGTTGGAGAAACAATATATTGAGAACAACAAGAGTCTGAATGTGCATGTGTAATGGTTCCTTACCATAATGACC  
GATGGACCAAGTGATGGACAGGCCTCATAACAAGATCTTCAGAATAGAAAAGGGAAAGATAGTCAAATCAGTCGAAATGAATGCCCTAATTACTATGAGGAATG  
CTCCTGTTATCCTGATTCTAGTGAATCACATGTGTGTGCAGGGATAACTGGCATGGCTCGAATCGACCGTGGGTGTCTTTCAACCAGAATCTGGAATATCAGATAG  
GATACATATGCAGTGGGGTTTTCGGAGACAATCCACGCCCTAATGATAAGACAGGCAGTTGTGGTCCAGTATCGTCTAATGGAGCAAATGGAGTAAAAGGATTTTCA  
TTCAAATACGGCAATGGTGTGGATAGGGGAGAACTAAAAGCATTAGTTCAAGAAAAGGTTTTGAGATGATTTGGGATCCGAATGGATGGACTGGGACAGACAATAA  
CTTCTCAATAAAGCAAGATATCGTAGGAATAAAGAGTGGTCAGGATATAGCGGGAGTTTTGTTGAGCATCCAGAATAACAGGGCTGGATTGTATAAGACCTTGCT  
TCTGGGTTGAACTAATCAGAGGGGCGACCCGAAGAGAACAACAATCTGGACTAGCGGGAGCAGCATATCCTTTTGTGGTGTAAACAGTGACACTGTGGGTTGGTCT

>HAP60\_0.00228412 | global\_haplotype frequency=0.002284

ATAATAACCATTGGTTTCGGTCTGTATGACAATTGGAATGGCTAACTTAATATTACAAATTGGAAACATAATCTCAATATGGGTTAGCCACTCAATTCAACTTGGGAATC  
AAAGTCATATTGAAACATGCAATCAAAGCGTCATTACTTATGAAAACAACACTTGGGTAAATCAGACATATGTTAACATCAGCAACACCAACTTTGCTGCTGGACAGT  
CAGTGGTTCCCGTGAAATTAGCGGGCAATTCCTCTCTCTGCCCTGTTAGTGGATGGGCTATATACAGTAAAGACAACAGTGTAAAGAATCGGTTCCAAGGGGGATGT  
GTTTGTGATAAGGGGACCATTTCATATCAGAATCCCCCTTGAATGCAGAACCTTCTTCTTGAAGGCGCTTGTAAATGACAAACATTCCAATGGAACCATTAA  
AGACAGGAGCCCATATCGAACCCTAATGAGCTGTCCTATTGGTGAAGTTCCTCTCCATACAGATCGGAATTTGAGTCAGTCGCTTGGTCAGCAAGTGCTTGTGATG  
ATGGCATCAATTGGCTAACAATTGGAATTTCTGGCCCAGACAATGGGGCAGTGGCTGTGTTAAAGTACAATGGCATAATAACAGACACTATCAAGAGTTGGAGAAAC  
AATATATTGAGAACACAAGAGTCTGAATGTGCATGTGTAATGGTTCCTTGTCTTACCATAATGACCGATGGACCAAGTGATGGACAGGCCTCATAACAAGATCTTCAGA  
ATAGAAAAGGGAAAGATAGTCAAATCAGTCGAAATGAATGCCCTAATTACTATGAGGAATGCTCCTGTTATCCTGATTCTAGTGAAATCACATGTGTGTGCAGG  
GATAACTGGCATGGCTCGAATCGACCGTGGGTGTCTTTCAACCAGAATCTGGAATATCAGATAGGATACATATGCAGTGGGGTTTTTCGGAGACAATCCACGCCCTA  
ATGATAAGACAGGCAGTTGTGGTCCAGTATCGTCTAATGGAGCAAAATGGAGTAAAGGATTTTCATTCAAATACGGCAATGGTGTGTTGGATAGGGGAGAACTAAAAGC  
ATTAGTTCAAGAAAAGGTTTTGAGATGATTTGGGATCCGAATGGATGGACTGGGACAGACAATAACTTCTCAATAAAGCAAGATATCGTAGGAATAAAAGAGTGGTC  
AGGATATAGCGGGAGTTTTGTTTCAGCATCCAGAACTAACAGGGCTGGATTGTATAAGACCTTGCTTCTGGGTTGAACTAATCAGAGGGCGACCCGAAGAGAACACA  
ATCTGGACTAGCGGGAGCAGCATATCCTTTTGTGGTGTAACAGTGACACTGTGGGTTGGTCT

>HAP61\_0.00226484 | global\_haplotype frequency=0.002265

ATAATAACCATTGGTTTCGGTCTGTATGACAATTGGAATGGCTAACTTAATATTACAAATTGGAAACATAATCTCAATATGGGTTAGCCACTCAATTCAACTTGGGAATC  
AAAGTCATATTGAAACATGCAATCAAAGCGTCATTACTTATGAAAACAACACTTGGGTAAATCAGACATATGTTAACATCAGCAACACCAACTTTGCTGCTGGACAGT  
CAGTGGTTCCCGTGAAATTAGCGGGCAATTCCTCTCTCTGCCCTGTTAGTGGATGGGCTATATACAGTAAAGACAACAGTGTAAAGAATCGGTTCCAAGGGGGATGT  
GTTTGTGATAAGGGACCCATTTCATATCATGCTCCCCCTTGAATGCAGAACCTTCTTCTTGAAGGCGCTTGTAAATGACAAACATTCCAATGGAACCATTAA  
AGACAGGAGCCCATATCGAACCCTAATGAGCTGTCCTATTGGTGAAGTTCCTCTCCATACCGCTCCCGATTTCAGTCAGTCGCTTGGTCAGCAAGTGCTTGTGAT  
GATGGCATCAATTGGCTAACAATTGGAATTTCTGGCCCAGGCAATGGGGCAGTGGCTGTGTTAAAGTACAATGGCATAATAACAGACACTATCAAGAGTTGGAGAAA  
CAATATATTGAGAACACAAGAGTCTGAATGTGCATGTGTAATGGTTCCTTGTCTTACCATAATGACCGATGGACCAAGTGATGGACAGGCCTCATAACAAGATCTTCAG  
AATAGAAAAGGGAAAGATAGTCAAATCAGTCGAAATGAATGCCCTAATTACTATGAGGAATGCTCCTGTTATCCTGATTCTAGTGAAATCACATGTGTGTGCAG  
GGATAACTGGCATGGCTCGAATCGACCGTGGGTGTCTTTCAACCAGAATCTGGAATATCAGATAGGATACATATGCAGTGGGGTTTTTCGGAGACAATCCACGCCCT  
AATGATAAGACAGGCAGTTGTGGTCCAGTATCGTCTAATGGAGAAAATGGAGTAAAGGATTTTCATTCAAATACGGAAATGGTTTTTGGATAGGGGAAAAAAAAAAGA  
ATTAGTTCAAGAAAAGGTTTTGAGATGATTTGGGATCCGAATGGATGGACTGGGACAGACAATAACTTCTCAATAAAGCAAGATATCGTAGGAATAAAAGAGTGGTC  
AGGATATAGCGGGAGTTTTGTTTCAGCATCCAGAACTAACAGGGCTGGATTGTATAAGACCTTGCTTCTGGGTTGAACTAATCAGAGGGCGACCCGAAGAGAACACA  
ATCTGGACTAGCGGGAGCAGCATATCCTTTTGTGGTGTAACAGTGACACTGTGGGTTGGTCT



>HAP62\_0.00224706 | global\_haplotype frequency=0.002247

ATAATAACCATTGGTTTCGGTCTGTATGACAATTGGAATGGCTAACTTAATATTACAAATTGGAAACATAATCTCAATATGGGTTAGCCACTCAATTCAACTTGGGAATC  
AAAGTCATATTGAAACATGCAATCAAAGCGTCATTACTTATGAAAACAACACTTGGGTAAATCAGACATATGTTAACATCAGCAACACCAACTTTGCTGCTGGACAGT  
CAGTGGTTCCCGTGAAATTAGCGGGCAATTCCTCTCTCTGCCCTGTTAGTGGATGGGCTATATACAGTAAAGACAACAGTGTAAAGAATCGGTTCCAAGGGGGATGT  
GTTTGTGATAAAGGGACCCATTCATATCATGCTCCCCCTTGAATGCAGAACCTTCTTCTTGAAGGCGCCTTGCTAAATGACAAACATTCCAATGGAACCATTAA  
AGACAGGAGCGCTCTTCCGATCTTAATGAGCTGTCCTATTGGTGAAGTTCCTCTCCATACAACTCAAGATTTGAGTCAGTCGCTTGGTCAGCAAGTGTGCTTGTGTCATG  
ATGGCATCAATTGGCTAACAATTGGAATTTCTGGCCAGACAATGGGGCAGTGGCTGTGTTAAAGTACAATGGCATAATAACAGACACTATCAAGAGTTGGAGAAAC  
AATATATTGAGAACACAAGAGTCTGAATGTGCATGTGTAATGGTTCTTGTCTTACCATAATGACCGATGGACCAAGTGTGACAGGCCTCATAACAAGATCTTCAGA  
ATAGAAAAGGGAAAGATAGTCAAATCAGTCGAAATGAATGCCCTAATTACTATGAGGAATGCTCCTGTTATCCTGATTCTAGTAAATCACATGTGTGTGCAGG  
GATAACTGGCATGGCTCGAATCGACCGTGGGTGTCTTTCAACCAGAATCTGGAATATCAGATAGGATACATATGCAGTGGGGTTTTTCGGAGACAATCCACGCCCTA  
ATGATAAGACAGGCAGTTGTGGTCCAGTATCGAGAAATGGAGCAAATGGAGTAAAGGATTTTCATTCAAATACGGCAATGGTGTGTTGGATAGGGAGAACTAAAAGC  
ATTAGTTCAAGAAAAGGTTTTGAGATGATTTGGGATCCGAATGGATGGACTGGGACAGACAATAACTTCTCAATAAAGCAAGATATCGTAGGAATAAAAGAGTGGTC  
AGGATATAGCGGGAGTTTTGTTGAGCATCCAGAACTAACAGGGCTGGATTGTATAAGACCTTGCTTCTGGGTTGAACTAATCAGAGGGCGACCCGAAGAGAACACA  
ATCTGGACTAGCGGGAGCAGCATATCCTTTTGTGGTGTAAACAGTGACACTGTGGGTTGGTCT

>HAP63\_0.00224077 | global\_haplotype frequency=0.002241

ATAATAACCATTGGTTTCGGTCTGTATGACAATTGGAATGGCTAACTTAATATTACAAATTGGAAACATAATCTCAATATGGGTTAGCCACTCAATTCAACTTGGGAATC  
AAAGTCATATTGAAACATGCAATCAAAGCGTCATTACTTATGAAAACAACACTTGGGTAAATCAGACATATGTTAACATCAGCAACACCAACTTTGCTGCTGGGCAGT  
CAGTGGTTCCCGTGAAATTAGCGGGCAATTCCTCTCTCTGCCCTGTTAGTGGATGGGCTATATACAGTAAAGACAACAGTGTAAAGAATCGGTTCCAAGGGGGATGT  
GTTTGTGATAAAGGGACCCATTCATATCATGCTCCCCCTTGAATGCAGAACCTTCTTCTTGAAGGCGCCTTGCTAAATGACAAACATTCCAATGGAACCATTAA  
AGACAGGAGCCATATCGAACCCTAATGAGCTGTCCTATTGGTGAAGTTCCTCTCCATAAGATCGGAATTTGAGTCAGTCGCTTGGTCAGCAAGTGTGCTTGTGTCATG  
ATGGCATCAATTGGCTAACAATTGGAATTTCTGGCCAGACAATGGGGCAGTGGCTGTGTTAAAGTACAATGGCATAATAACAGACACTATCAAGAGTTGGAGAAAC  
AATATATTGAGAACACAAGAGTCTGAATGTGCATGTGTAATGGTTCTTGTCTTACCATAATGACCGATGGACCAAGTGTGACAGGCCTCATAACAAGATCTTCAGA  
ATAGAAAAGGGAAAGATAGTCAAATCAGTCGAAATGAATGCCCTAATTACTATGAGGAATGCTCCTGTTATCCTGATTCTAGTAAATCACATGTGTGTGCAGG  
GATAACTGGCATGGCTCGAATCGACCGTGGGTGTCTTTCAACCAGAATCTGGAATATCAGATAGGATACATATGCAGTGGGGTTTTTCGGAGACAATCCACGCCCTA  
ATGATAAGACAGGCAGTTGTGGTCCAGTATCGTCTAATGGAGCAAATGGAGTAAAGGATTTTCATTCAAATACGGCAATGGTGTGTTGGATAGGGAGAACTAAAAGC  
ATTAGTTCAAGAAAAGGTTTTGAGATGATTTGGGATCCGAATGGATGGACTGGGACAGACAATAACTTCTCAATAAAGCAAGATATCGTAGGAATAAAAGAGTGGTC  
AGGATATAGCGGGAGTTTTGTTGAGCATCCAGAACTAACAGGGCTGGATTGTATAAGACCTTGCTTCTGGGTTGAACTAATCAGAGGGCGACCCGAAGAGAACACA  
ATCTGGACTAGCGGGAGCAGCATATCCTTTTGTGGTGTAAACAGTGACACTGTGGGTTGGTCT

>HAP64\_0.00220166 | global\_haplotype frequency=0.002202

ATAATAACCATTGGTTTCGGTCTGTATGACAATTGGAATGGCTAACTTAATATTACAAATTGGAAACATAATCTCAATATGGGTTAGCCACTCAATTCAACTTGGGAATC  
AAAGTCATATTGAAACATGCAATCAAAGCGTCATTACTTATGAAAACAACACTTGGGTAAATCAGACATATGTTAACATCAGCAACACCAACTTTGCTGCTGGACAGT  
CAGTGGTTCCCGTGAAATTAGCGGGCAATTCCTCTCTCTGCCCTGTTAGTGGATGGGCTATATACAGTAAAGACAACAGTGTAAAGAATCGGTTCCAAGGGGGATGT  
GTTTGTGATAAAGGGAACCATTTCATATCATGCTCCCCCTTGAATGCAGAACCTTCTTCTTGAAGGCGCCTTGCTAAATGACAAACATTCCAATGGAACCATTAA  
AGACAGGAGCCCATATCGAACCCTAATGAGCTGTCCTATTGGTGAAGTTCCTCTCCATACAACTCAAGATTTGAGTCAGTCGCTTGGTCAGCAAGTGGCTTGTGTCATG  
ATGGCATCAATTGGCTAACAATTGGAATTTCTGGCCAGACGATGGGGCAGTGGCTGTGTTAAAGTACAATGGCATAATAACAGACACTATCAAGAGTTGGAGAAAC  
AATATATTGAGAACAACAAGAGTCTGAATGTGCATGTGTAATGGTTCTTGGCTTACCATAATGACCGATGGACCAAGTGTGACAGGCCTCATAACAAGATCTTCAGA  
ATAGAAAAGGGAAAGATAGTCAAATCAGTCGAAATGAATGCCCTAATTACTATGAGGAATGCTCCTGTTATCCTGATTCTAGTAAATCACATGTGTGTGCAGG  
GATAACTGGCATGGCTCGAATAGATCGGAAGAGTCTTCAACCAGAATCTGGAATATCAGATAGGATACATATGCAGTGGGGTTTTTCGGAGACAATCCACGCCCTAA  
TGATAAGACAGGCAGTTGTGGTCCAGTATCGTCTAATGGAGCAAATGGAGTAAAAGGATTTTCATTCAAATACGGAAATGGTGTGGATAGGGAGAACTAAAAGCA  
TTAGTTCAAGAAAAGTTTTGAGATGATTTGGGATCCGAATGGATGGACTGGGACAGACAATAACTTCTCAATAAAGCAAGATATCGTAGGAATAAAGAGTGGTCA  
GGATATAGCGGGAGTTTTGTTTCAGCATCCAGAACTAACAGGGCTGGATTGTATAAGACCTTGCTTCTGGGTTGAACTGATCGGAGGGCGACCCGAGGAGAGCACA  
GTCTGGACTGGCGGGAGCAGCATATCCTTTTGTGGTGTAAACAGTGACACTGTGGGTTGGTCT

>HAP65\_0.00197692 | global\_haplotype frequency=0.001977

ATAATAACCATTGGTTTCGGTCTGTATGACAATTGGAATGGCTAACTTAATATTACAAATTGGAAACATAATCTCAATATGGGTTAGCCACTCAATTCAACTTGGGAATC  
AAAGTCATATTGAAACATGCAATCAAAGCGTCATTACTTATGAAAACAACACTTGGGTAAATCAGACATATGTTAACATCAGCAACACCAACTTTGCTGCTGGACAGT  
CAGTGGTTCCCGTGAAATTAGCGGGCAATTCCTCTCTCTGCCCTGTTAGTGGATGGGCTATATACAGTAAAGACAACAGTGTAAAGAATCGGTTCCAAGGGGGATGT  
GTTTGTGATAAAGGACCATTTCATATCATGCTCCCCCTTGAATGCAGAACCTTCTTCTTGAAGGCGCCTTGCTAAATGACAAACATTCCAATGGAACCATTAA  
AGACAGGAGCCCATATCGAACCCTAATGAGCTGTCCTATTGGTGAAGTTCCTCTCCATACAACTCAAGATTTGAGTCAGTCGCTTGGTCAGCAAGTGGCTTGTGTCATG  
ATGGCATCAATTGGCTAACAATTGGAATTTCTGGCCAGACAATGGGGCAGTGGCTGTGTTAAAGTACAATGGCATAATAACAGACACTATCAAGAGTTGGAGAAAC  
AATATATTGAGAACAACAAGAGTCTGAATGTGCATGTGTAATGGTTCTTGGCTTACCATAATGACCGATGGACCAAGTGTGACAGGCCTCATAACAAGATCTTCAGA  
ATAGAAAAGGGAAAGATAGTCAAATCAGTCGAAATGAATGCCCTAATTACTATGAGGAATGCTCCTGTTATCCTGATTCTAGTAAATCACATGTGTGTGCAGG  
GATAACTGGCATGGCTCGAATCGACCGTGGGTGTCTTCAACCAGAATCTGGAATATCAGATAGGATACATGTGCAGTGGGGTTTTTCGGAGACAATCCACGCCCTA  
ATGATAAGACAGGCAGTTGTGGTCCAGAATCGTCTAATGGAGCAAATGGAGTAAAAGGATTTTCATTCAAATACGGCAATGGTGTGGATAGGGAGAACTAAAAGC  
ATTAGTTCAAGAAAAGTTTTGAGATGATTTGGGATCCGAATGGATGGACTGGGACAGACAATAACTTCTCAATAAAGCAAGATATCGTAGGAATAAAGAGTGGTCA  
AGGATATAGCGGGAGTTTTGTTTCAGCATCCAGAACTAACAGGGCTGGATTGTATAAGACCTTGCTTCTGGGTTGAACTAATCAGAGGGCGACCCGAAGAGAACACA  
ATCTGGACTAGCGGGAGCAGCATATCCTTTTGTGGTGTAAACAGTGACACTGTGGGTTGGTCT

>HAP66\_0.00194011 | global\_haplotype frequency=0.001940

ATAATAACCATTGGTTCCGGTCTGTATGACAATTGGAATGGCTAACTTAATATTACAAATTGGAAACATAATCTCAATATGGGTTAGCCACTCAATTCAACTTGGGAATC  
AAAGTCATATTGAAACATGCAATCAAAGCGTCATTACTTATGAAAACAACACTTGGGTAAATCAGACATATGTTAACATCAGCAACACCAACTTTGCTGCTGGACAGT  
CAGTGGTTCCCGTGAAATTAGCGGGCAATTCCTCTCTCTGCCCTGTTAGTGGATGGGCTATATACAGTAAAGACAACAGTGTAAAGAATCGGTTCCAAGGGGGATGT  
GTTTGTGATAAAGGACCCATTCATATCATGCTCCCCCTTGAATGCAGAACCTTCTTCTTGAAGGAGGCTTGTAAATGACAAACATTCCAATGGAACCATTAA  
AGACAGGAGCCCATATCGAACCCTAATGAGCTGTCCTATTGGTGACGCTCCCGATCTACTCAACTCAAGATTTGAGTCAGTCGCTTGGTCAGCAAGTGCTTGTGATG  
ATGGCATCAATTGGCTAACAATTGGAATTTCTGGCCAGACAATGGGGCAGTGGCTGTGTTAAAGTACAATGGCATAATAACAGACACTATCAAGAGTTGGAGAAAC  
AATATATTGAGAACACAAGAGTCTGAATGTGCATGTGTAATGGTTCTTGTCTTACCATAATGACCGATGGACCAAGTGATGGACAGGCCTCATAACAAGATCTTCAGA  
ATAGAAAAGGGAAAGATAGTCAAATCAGTCGAAATGAATGCCCTAATTACTATGAGGAATGCTCCTGTTATCCTGATTCTAGTGAAATCACATGTGTGTGCAGG  
GATAACTGGCATGGCTCGAATAGATCGGAAGAGTCTTCAACCAGAATCTGGAATATCAGATAGGATACATATGCAGTGGGGTTTTTCGGAGACAATCCACGCCCTAA  
TGATAAGACAGGCAGTTGTGGTCCAGTATCGTCTAATGGAGCAAATGGAGTAAAAGGATTTTCATTCAAATACGGCAATGGTGTGGATAGGGAGAACTAAAAGCA  
TTAGTTCAAGAAAAGTTTTGAGATGATTTGGGATCCGAATGGATGGACTGGGACAGACAATAACTTCTCAATAAAGCAAGATATCGTAGGAATAAAAGAGTGGTCA  
GGATATAGCGGGAGTTTTGTTCCAGCATCCAGAACTAACAGGGCTGGATTGTATAAGACCTTGTCTTGGGTTGAACTAA-  
TAGAGGGCGACCCGAAGAGAACAATCTGGACTAGCGGGAGCAGCATATCCTTTTGTGGTGTAAACAGTGACACTGTGGGTTGGTCT

>HAP67\_0.00182948 | global\_haplotype frequency=0.001829

ATAATAACCATTGGTTCCGGTCTGTATGACAATTGGAATGGCTAACTTAATATTACAAATTGGAAACATAATCTCAATATGGGTTAGCCACTCAATTCAACTTGGGAATC  
AAAGTCATATTGAAACATGCAATCAAAGCGTCATTACTTATGAAAACAACACTTGGGTAAATCAGACATATGTTAACATCAGCAACACCAACTTTGCTGCTGGACAGT  
CAGTGGTTCCCGTGAAATTAGCGGGCAATTCCTCTCTCTGCCCTGTTAGTGGATGGGCTATATACAGTAAAGACAACAGTGTAAAGAATCGGTTCCAAGGGGGATGT  
GTTTGTGATAAAGGACCCATTCATATCATGCTCCCCCTTGAATGCAGAACCTTCTTCTTGAAGGAGGCTTGTAAATGACAAACATTCCAATGGAACCATTAA  
AGACAGGAGCCCATATCGAACCCTAATGAGCTGTCCTATTGGTGAAGTTCCCTCTCCATACAACACTCAAGATTTGAGTCAGTCGCTTGGTCAGCAAGTGCTTGTGATG  
ATGGCATCAATTGGCTAACAATTGGAATTTCTGGCCATACAATGGGGCAGTGGCTGTGTTAAAGTACAATGGCATAATAACAGACACTATCAAGAGTTGGAGAAAC  
AATATATTGAGAACACAAGAGTCTGAATGTGCATGTGTAATGGTTCTTGTCTTACCATAATGACCGATGGACCAAGTGATGGACAGGCCTCATAACAAGATCTTCAGA  
ATAGAAAAGGGAAAGATAGTCAAATCAGTCGAAATGAATGCCCTAATTACTATGAGGAATGCTCCTGTTATCCTGATTCTAGTGAAATCACATGTGTGTGCAGG  
GATAACTGGCATGGCTCGAATCGACCGTGGGTGTCTTCAACCAGAATCTGGAATATCAGATAGGATACATATGCAGTGGGGTTTTTCGGAGACAATCCACGCCCTA  
ATGATAAGACAGGCAGTTGTGGTCCAGTATCGTCTAATGGAGCAAATGGAGTAAAAGGATTTTCATTCAAATACGGCAATGGTGTGGATAGGGAGAACTAAAAGC  
ATTAGTTCAAGAAAAGTTTTGAGATGATTTGGGATCCGAATGGATGGACTGGGACAGACAATAACTTCTCAATAAAGCAAGATATCGTAGGAATAAAAGAGTGGTCA  
AGAATATAGCGGGAGTTTTTCCAGCATCAAAAATAACAGGGCTGGTTTTTAAAAGCCCTTGTTTTTGGGTTAACTAATAAGAGGGCGACCCGAAGAGAACAACA  
TCTGGACTAGCGGGAGCAGCATATCCTTTTGTGGTGTAAACAGTGACACTGTGGGTTGGTCT

>HAP68\_0.00182129 | global\_haplotype frequency=0.001821

ATAATAACCATTGGTTCGGTCTGTATGACAATTGGAATGGCTAACTTAATATTACAAATTGGAAACATAATCTCAATATGGGTTAGCCACTCAATTCAACTTGGGAATC  
AAAGTCATATTGAAACATGCAATCAAAGCGTCATTACTTATGAAAACAACACTTGGGTAAATCAGACATATGTTAACATCAGCAACACCAACTTTGCTGCTGGACAGT  
CAGTGGTTCCTCGTAAATTAGCGGGCAATTCCTCTCTCTGCCCTGTTAGTGGATGGGCTATATACAGTAAAGACAACAGTGTAAAGAATCGGTTCCAAGGGGGATGT  
GTTTGTGATAAGGGACCCATTCATATCATGCTCCCCCTTGAATGCAGAACCTTCTTCTTACTCAAGGGGCCTTGCTAAATGACAAACATTCCAATGGAACCATTAA  
AGACAGGAGCCCATATCGAACCCTAATGAGCTGTCCTATTGGTGAAGTTCCTCTCCATACAACTCAAGATTTGAGTCAGTCGCTTGGTCAGCAAGTGTGCTGTCATG  
ATGGCATCAATTGGCTAACAATTGGAATTTCTGGCCAGACAATGGGGCAGTGGCTGTGTTAAAGTACAATGGCATAATAACAGACACTATCAAGAGTTGGAGAAAC  
AATATATTGAGAACACAAGAGTCTGAATGTGCATGTGTAATGGTTCCTTACTTACCATAATGACCGATGGACCAAGTGTGACAGGCCTCATAAAGATCTTCAGA  
ATAGAAAAGGGAAAGATAGTCAAATCAGTCGAAATGAATGCCCTAATTATTACTATGAGGAATGCTCCTGTTATCCTGATTCTAGTGAATCACATGTGTGTGCAGG  
GATAACTGGCATGGCTCGAATCGACCGTGGGTGTCTTTCAACCAGAATCTGGAATATCAGATAGGATACATATGCAGTGGGGTTTTCGGAGACAATCCACGCCCTA  
ATGATAAGACAGGCAGTTGTGGTCCAGTATCGTCTAATGGAGCAAATGGAGTAAAAGGATTTTTCAATCAAATACGGCAATGGTGTGGATAGGGAGAACTAAAAGC  
ATTAGTTCAAGAAAAGTTTTGAGATGATTTGGGATCCGAATGGATGGACTGGGACAGACAATAACTTCTCAATAAAGCAAGATATCGTAGGAAAAAAGAGTGGTC  
AGGATATAGGGGGAGTTTTGTTTCAGCATCAAGAACTAACAGGGCTGGATTTTAAAAGCCCTTGTCTGGTTTAACTAATAAGAGGGCGACCCGAAGAGAACACAA  
TCTGGACTAGCGGGAGCAGCATATCCTTTTGTGGTGTAAACAGTGACACTGTGGGTTGGTCT

>HAP69\_0.0018072 | global\_haplotype frequency=0.001807

ATAATAACCATTGGTTCGGTCTGTATGACAATTGGAATGGCTAACTTAATATTACAAATTGGAAACATAATCTCAATATGGGTTAGCCACTCAATTCAACTTGGGAATC  
AAAGTCATATTGAAACATGCAATCAAAGCGTCATTACTTATGAAAACAACACTTGGGTAAATCAGACATATGTTAACATCAGCAACACCAACTTTGCTGCTGGACAGT  
CAGTGGTTCCTCGTAAATTAGCGGGCAATTCCTCTCTCTGCCCTGTTAGTGGATGGGCTATATACAGTAAAGACAACAGTGTAAAGAATCGGTTCCAAGGGGGATGT  
GTTTGTGATAAGGGACCCATTCATATCATGCTCCCCCTTGAATGCAGAACCTTCTTCTTACTCAAGGGGCCTTGCTAAATGACAAACATTCCAATGGAACCATTAA  
AGACAGGAGCCCATATCGAACCCTAATGAGCTGTCCTATTGGTGAAGTTCCTCTCCATACAACTCAAGATTTGAGTCAGTCGCTTGGTCAGCAAGTGTGCTGTCATG  
ATGGCATCAATTGGCTAACAATTGGAATTTCTGGCCAGACAATGGGGCAGTGGCTGTGTTAAAGTACAATGGCATAATAACAGACACTATCAAGAGTTGGAGAAAC  
AATATATTGAGAACACAAGAGTCTGAATGTGCATGTGTAATGGTTCCTTACTTACCATAATGACCGATGGACCAAGTGTGACAGGCCTCATAAAGATCTTCAGA  
ATAGAAAAGGGAAAGATAGTCAAATCAGTCGAAATGAATGCCCTAATTATTACTATGAGGAATGCTCCTGTTATCCTGATTCTAGTGAATCACATGTGTGTGCAGG  
GATAACTGGGATCTCTCGAATCGACCGTGGGTGTCTTTCAACCAGAATCTGGAATATCAGATAGGATACATATGCAGTGGGGTTTTCGGAGACAATCCACGCCCTAA  
TGATAAGACAGGCAGTTGTGGTCCAGTATCGAGAAATGGAGCAAATGGAGTAAAAGGATTTTTCAATCAAATACGGCAATGGTGTGGATAGGGAGAACTAAAAGCA  
TTAGTTCAAGAAAAGTTTTGAGATGATTTGGGATCCGAATGGATGGACTGGGACAGACAATAACTTCTCAATAAAGCAAGATATCGTAGGAATAAAGAGTGGTCA  
GGATATAGCGGGAGTTTTGTTTCAGCATCCAGAACTAACAGGGCTGGATTTGATAAGACCTTGTCTGGGTTGAACTAATCAGAGGGCGACCCGAAGAGAACACAA  
TCTGGACTAGCGGGAGCAGCATATCCTTTTGTGGTGTAAACAGTGACACTGTGGGTTGGTCT

>HAP70\_0.0017355 | global\_haplotype frequency=0.001736

ATAATAACCATTGGTTCCGGTCTGTATGACAATTGGAATGGCTAACTTAATATTACAAATTGGAAACATAATCTCAATATGGGTTAGCCACTCAATTCAACTTGGGAATC  
AAAGTCATATTGAAACATGCAATCAAAGCGTCATTACTTATGAAAACAACACTTGGGTAAATCAGACATATGTTAACATCAGCAACACCAACTTTGCTGCTGGACAGT  
CAGTGGTTCCCGTGAAATTAGCGGGCAATTCCTCTCTCTGCCCTGTTAGTGGATGGGCTATATACAGTAAAGACAACAGTGTAAAGAATCGGTTCCAAGAGCGATGT  
GTTTGTGATAAGGGAACCATTTCATATCATGCTCCCCCTTGAATGCAGAACCTTCTTCTTGAAGGAGGCGCTTGTAAATGACAAACATTCCAATGGAACCATTAA  
AGACAGGAGCCCATATCGAACCTAATGAGCTGTCCTATTGGTGAAGTTCCTCTCCATACAACTCAAGATTTGAGTCAGTCGCTTGGTCAGCAAGTGTCTTGTGATG  
ATGGCATCAATTGGCTAACAATTGGAATTTCTGGCCAGACAATGGGGCAGTGGCTGTGTTAAAGTACAATGGCATAATAACAGACACTATCAAGAGTTGGAGAAAC  
AATATATTGAGAACACAAGAGTCTGAATGTGCATGTGTAATGGTTCCTTGTCTTACCATAATGACCGATGGACCAAGTGTGACAGGCCTCATAACAAGATCTTCAGA  
ATAGAAAAGGGAAAGATAGTCAAATCAGTCGAAATGAATGCCCTAATTACTATGAGGAATGCTCCTGTTATCCTGATTCTAGTGAATCACATGTGTGTGCAGG  
GATAACTGGCATGGCTCGAATCGACCGTGGGTGTCTTTCAACCAGAATCTGGAATATCAGATAGGATACATGTGCAGTGGGGTTTTCCGAGACAATCCACGCCCTA  
ATGATAAGACAGGCAGTTGTGGTCCAGAATCGTCTAATGGAGCAAATGGAGTAAAGGATTTTCATTCAAATACGGCAATGGTGTGGATAGGGGAGAACTAAAAGC  
ATTAGTTCAAGAAAAGGTTTTGAGATGATTTGGGATCCGAATGGATGGACTGGGACAGACAATAACTTCTCAATAAAGCAAGATATCGTAGGAATAAAGAGTGGTC  
AGGATATAGCGGGAGTTTTGTTGAGCATCCAGAACTAACAGGGCTGGATTGTATAAGACCTTGCTTCTGGGTTGAACTAATCAGAGGGCGACCCGAAGAGAACA  
ATCTGGACTAGCGGGAGCAGCATATCCTTTTGTGGTGTAAACAGTGACACTGTGGGTTGGTCT

>HAP71\_0.00170098 | global\_haplotype frequency=0.001701

ATAATAACCATTGGTTCCGGTCTGTATGACAATTGGAATGGCTAACTTAATATTACAAATTGGAAACATAATCTCAATATGGGTTAGCCACTCAATTCAACTTGGGAATC  
AAAGTCATATTGAAACATGCAATCAAAGCGTCATTACTTATGAAAACAACACTTGGGTAAATCAGACATATGTTAACATCAGCAACACCAACTTTGCTGCTGGACAGT  
CAGTGGTTCCCGTGAAATTAGCGGGCAATTCCTCTCTCTGCCCTGTTAGTGGATGGGCTATATACAGTAAAGACAACAGTGTAAAGAATCGGTTCCAAGGGGGATGT  
GTTTGTGATAAGGGACCCATTTCATATCATGCTCCCCCTTGAATGCAGAACCTTCTTCTTGAAGGAGGCGCTTGTAAATGACAAACATTCCAATGGAACCATTAA  
AGACAGGAGCCCATATCGAACCTAATGAGCTGTCCTATTGGTGAAGTTCCTCTCCATACAACTCAAGATTTGAGTCAGTCGCTTGGTCAGCAAGTGTCTTGTGATG  
ATGGCATCAATTGGCTAACAATTGGAATTTCTGGCCAGACAATGGGGCAGTGGCTGTGTTAAAGTACAATGGCATAATAACAGACACTATCAAGAGTTGGAGAAAC  
AATATATTGAGAACACAAGAGTCTGAATGTGCATGTGTAATGGTTCCTTGTCTTACCATAATGACCGATGGACCAAGTGTGACAGGCCTCATAACAAGATCTTCAGA  
ATAGAAAAGGGAAAGATAGTCAAATCAGTCGAAATGAATGCCCTAATTACTATGAGGAATGCTCCTGTTATCCTGATTCTAGTGAATCACATGTGTGTGCAGG  
GATAACTGGCATGGCTCGAATCGACCGTGGGTGTCTTTCAA-CAG-ATC-  
GGAAGAGCACACAGGATACATATGCAGTGGGGTTTTCCGAGACAATCCACGCCCTAATGATAAGACAGGCAGTTGTGGTCCAGTATCGTCTAATGGAGCAAATGGA  
GTAAAAGGATTTTCATTCAAATACGGCAATGGTGTGGATAGGGGAGAACTAAAAGCATTAGTTCAAGAAAAGGTTTTGAGATGATTTGGGATCCGAATGGATGGAC  
TGGGACAGACAATAACTTCTCAATAAAGCAAGATATCGTAGGAATAAAGAGTGGTCAGGATATAGCGGGAGTTTTGTTGAGCATCCAGAACTAACAGGGCTGGATT  
GTATAAGACCTTGCTTCTGGGTTGAACTAATCAGAGGGCGACCCGAAGAGAACAATCTGGACTAGCGGGAGCAGCATATCCTTTTGTGGTGTAAACAGTGACAC  
TGTGGGTTGGTCT

>HAP72\_0.0016466 | global\_haplotype frequency=0.001647

ATAATAACCATTGGTTCGGTCTGTATGACAATTGGAATGGCTAACTTAATATTACAAATTGGAAACATAATCTCAATATGGGTTAGCCACTCAATTCAACTTGGGAATC  
AAAGTCATATTGAAACATGCAATCAAAGCGTCATTACTTATGAAAACAACACTTGGGTAAATCAGACATATGTTAACATCAGCAACACCAACTTTGCTGCTGGACAGT  
CAGTGGTTCCTGTAATAGCGGGCAATTCCTCTCTCTGCCCTGTTAGTGGATGGGCTATATACAGTAAAGACAACAGTGTAAAGAACCGTTCCAAGGGGGATGT  
GTTTGTGATAAGGGACCCATTCATATCATGCTCCCCCTTGAATGCAGAACCTTCTTCTTGAAGGAGGCTTAAATGACGAACATTCCAATGGAACCATTAA  
AGACAGGAGCCCATATCGAACCCTAATGAGCTGTCTATTGGTGAAGTTCCCTCTCCATACAACTCAAGATTTGAGACAGTCGCTTGGTCAGCAAGTGTCTGTCATG  
ATGGCATCAATTGGCTAACAATTGGAATTTCTGGCCCAGACAATGGGGCAGTGGCTGTGTTAAAGTACAATGGCATAATAACAGACACTATCAAGAGTTGGAGAAAC  
AATATATTGAGAACAAGAGTCTGAATGTGCATGTGTAATGGTTCTTGCTTTACCATAATGACCGATGGACCAAGTGATGGACAGGCCTCATAAAGATCTTCAGA  
ATAGAAAAGGGAAAGATAGTCAAATCAGTCGAAATGAATGCCCTAATTACTATGAGGAATGCTCCTGTTATCCTGATTCTAGTGAATCACATGTGTGTGCAGG  
GATAACTGGCATGGCTCGAATCGACCGTGGGTGTCTTTCAACCAGAATCTGGAATATCAGATAGGATACATATGCAGTGGGGTTTTTCGGAGACAATCCACGCCCTA  
ATGATAAGACAGGCAGTTGTGGTCCAGTATCGTCTAATGGAGCAAATGGAGTAAAGGATTTTCATTCAAATACGGCAATGGTGTGGATAGGGGAGAACTAAAAGC  
ATTAGTTCAAGAAAAGGTTTTGAGATGATTTGGGATCCGAATGGATGGACTGGGACAGACAATAACTTCTCAATAAAGCAAGATATCGTAGGAATAAAGAGTGGTC  
AGGATATAGCGGGAGTTTTGTTGAGCATCCAGAACTAACAGGGCTGGATTGTATAAGACCTTGCTTCTGGGTTGAACTAATCAGAGGGCGACCCGAAGAGAACA  
ATCTGGACTAGCGGGAGCAGCATATCCTTTTGTGGTGTAACAGTGACACTGTGGGTTGGTCT

>HAP73\_0.00159924 | global\_haplotype frequency=0.001599

ATAATAACCATTGGTTCGGTCTGTATGACAATTGGAATGGCTAACTTAATATTACAAATTGGAAACATAATCTCAATATGGGTTAGCCACTCAATTCAACTTGGGAATC  
AAAGTCATATTGAAACATGCAATCAAAGCGTCATTACTTATGAAAACAACACTTGGGTAAATCAGACATATGTTAACATCAGCAACACCAACTTTGCTGCTGGACAGT  
CAGTGGTTCCTGTAATAGCGGGCAATTCCTCTCTCTGCCCTGTTAGTGGATGGGCTATATACAGTAAAGACAACAGTGTAAAGAACCGTTCCAAGGGGCGATGT  
GTTTGTGATAAGGGACCCATTCATATCATGCTCCCCCTTGAATGCAGAACCTTCTTCTTGAAGGAGGCTTAAATGACAAACATTCCAATGGAACCATTAA  
AGACAGGAGCCCATATCGAACCCTAATGAGCTGTCTATTGGTGAAGTTCCCTCTCCATACAACTCAAGATTTGAGTCAGTCGCTTGGTCAGCAAGTGTCTGTCATG  
ATGGCATCAATTGGCTAACAATTGGAATTTCTGGCCCAGACAATGGGGCAGTGGCTGTGTTAAAGTACAATGGCATAATAACAGACACTATCAAGAGTTGGAGAAAC  
AATATATTGAGAACAAGAGTCTGAATGTGCATGTGTAATGGTTCTTGCTTTACCATAATGACCGATGGACCAAGTGATGGACAGGCCTCATAAAGATCTTCAGA  
ATAGAAAAGGGAAAGATAGTCAAATCAGTCGAAATGAATGCCCTAATTACTATGAGGAATGCTCCTGTTATCCTGATTCTAGTGAATCACATGTGTGTGCAGG  
GATAACTGGCATGGCTCGAATCGACCGTGGGTGTCTTTCAACCAGAATCTGGAATATCAGATAGGATACATATGCAGTGGGGTTTTTCGGAGACAATCCACGCCAG  
ATGATAAGACAGGCAGTTGTGGTCCAGTATCGTCTAATGGAGCAAATGGAGTAAAGGATTTTCATTCAAATACGGCAATGGTGTGGATAGGGGAGAACTAAAAGC  
ATTAGTTAAAGAAAAGGTTTTGAGATGATTTGGAATCAAATGGATGGACTGGGAAAGAAAATAACTTCTAAAAAAGAAAGATATCGTAGGAATAAAGAGTGGTCA  
GGATATAGCGGGAGTTTTGTTGAGCATCCAGAACTAACAGGGCTGGATTGTATAAGACCTTGCTTCTGGGTTGAACTAATCAGAGGGCGACCCGAAAAGAACA  
TCTGGACTAGCGGGAGCAGCATATCCTTTTGTGGTGTAACAGTGACACTGTGGGTTGGTCT

>HAP74\_0.0015634 | global\_haplotype frequency=0.001563

ATAATAACCATTGGTTCGGTCTGTATGACAATTGGAATGGCTAACTTAATATTACAAATTGGAAACATAATCTCAATATGGGTTAGCCACTCAATTCAACTTGGGAATC  
AAAGTCATATTGAAACATGCAATCAAAGCGTCATTACTTATGAAAACAACACTTGGGTAAATCAGACATATGTAAACATCAGCAACACCAACTTTGCTGCTGGACAGT  
CAGTGGTTCCTGTAATTAGCGGGCAATTCCTCTCTCTGCCCTGTTAGTGGATGGGCTATATACAGTAAAGACAACAGTGTAAAGAATCGGTTCCAAGGGGGATGT  
GTTTGTGATAAGGGAACCATTTCATATCATGCTCCCCCTTGGAAATGCAGAACCTTCTTCTTGAAGGAGGCTTGTAAATGACAAACATTCCAATGGAACCATTAA  
AGACAGGAGCCCATATCGAACCCTAATGAGCTGTCCTATTGGTGAAGTTCCCTCTCCATACAACTCAAGATTTGAGTCAGTCGCTTGGTCAGCAAGTGCTTGTGATG  
ATGGCATCAATTGGCTAACAATTGGAATTTCTGGCCCAGACAATCGGGCAGTGGCTGTGTTAAAGTACAATGGCATAATAACAGACACTATCAAGAGTTGGAGAAAC  
AATATATTGAGAACACAAGAGTCTGAATGTGCATGTGTAATGGTTCTTGCTTTACCATAATGACCGATGGACCAAGTGATGGACAGGCCTCATAACAAGATCTTCAGA  
ATAGAAAAGGGAAAGATAGTCAAATCAGTCGAAATGAATGCCCTAATTACTATGAGGAATGCTCCTGTTATCCTGATTCTAGTCAAATCACATGTGTGTGCAGG  
GATAACTGGCATGGCTCGAATCGACCGTGGGTGTCTTTCAACCAGAATCTGGAATATCAGATAGGATACATATGCAGTGGGGTTTTTCGGAGAGATTAGACGGAATA  
ATGATAAGACAGGCAGTTGTGGTCCAGTATCGTCTAATGGAGCAAATGGAGTAAAGGATTTTCATTCAAATACGGCAATGGTGTGGATAGGGGAGAACTAAAAGC  
ATTAGTTCAAGAAAAGGTTTTGAGATGATTTGGGATCCGAATGGATGGACTGGGACAGACAATAACTTCTCAATAAAGCAAGATATCGTAGGAATAAAGAGTGGTC  
AGGATATAGCGGGAGTTTTGTTGAGCATCCAGAACTAACAGGGCTGGATTGTATAAGACCTTGCTTCTGGGTTGAACTAATCAGAGGGCGACCCGAAGAGAACACA  
ATCTGGACTAGCGGGAGCAGCATATCCTTTTGTGGTGTAAACAGTGACACTGTGGGTTGGTCT
